# Supplementary material
Source: PubMed Central journal article supplement (PMC8516465)
Supplement: jci-131-144801-s055.pdf [file jci-131-144801-s055.pdf]

## **Sparcl1 promotes nonalcoholic steatohepatitis progression in mice through upregulation of CCL2**

### **Methods**

**Reagents.** Cenicriviroc was purchased from Adooq Bioscience (catalog A13643). CLI-095, JSH-23 and SB225002 were purchased from MedChemExpress (catalog HY-11109, HY-13982 and HY-16711). Recombinant mouse Sparcl1 protein were purchased from R&D (catalog 4547-SL). Enzyme-Linked Immunosorbent Assays (ELISA) kits for measuring plasma levels of human Sparcl1, human CCL2, mouse Sparcl1, mouse HMGB1, and mouse insulin were purchased from R&D (catalog DY2728), Anogen (catalog EL10009), Raybiotech (catalog ELM-SPARCL1-1), IBL International (catalog ST51011), and CrystalChem (catalog 90080), respectively.

**Histology analysis, immunostaining, TUNEL staining and Sirius red.** For H&E staining, liver tissues were fixed in 10% neutral-buffered formalin, embedded in paraffin, and cut into 5  $\mu$ m sections. Paraffin embedded tissue sections were subjected to de-paraffinization and rehydration, and then were immersed in 95 °C antigen retrieval buffer (10mM sodium citrate, 0.05% Tween 20, pH6.0) for 30 min. Cells were fixed with 10% buffered formalin for 10 min at room temperature and permeabilized with 0.02% Triton X-100 for 5 min. Tissue sections or cells were blocked with 1% normal donkey serum for 30 min. F4/80 (catalog ab6640, Abcam) and Ly6G staining (catalog 25377, Abcam) were conducted on indicated liver paraffin sections to analyze macrophage accumulation and neutrophils infiltration. Hepatocyte death was determined by TUNEL staining of liver

sections with TUNEL Assay Kit (catalog ab206386, Abcam) according to the manufacturer's instruction. Nuclei were stained with DAPI. Immunostaining was visualized with CaseViewer. For Sirius red staining, paraformaldehyde-fixed samples were embedded in paraffin, cut into 5  $\mu\text{m}$ -thick sections and stained with Sirius Red (saturated picric acid containing 0.1% DirectRed 80 and 0.1% FastGreen FCF; Sigma-Aldrich) according to standard procedures. Sirius Red stained sections were analyzed in a blinded manner by two pathologists. Fibrosis contents were assessed by quantitating histological collagen staining with Image J software in fifteen independent photos per mouse, taking care to avoid major vessels and liver capsule.

***Triglyceride quantification.*** Liver tissues were harvested and homogenized in 5% NP-40 solution and heated up to 100 °C and then cooled down to room temperature. The tissue homogenates were centrifuged and the supernatants were processed for measuring triglyceride and cholesterol contents using commercial kits (catalog K622, BioVision, Milpitas, USA).

***Hepatic hydroxyproline measurement.*** Liver tissues were homogenized in distilled water (100ml/10mg tissue). 100ml of 10 mol/L concentrated NaOH was added to each 100 ml samples and hydrolyzed at 120°C for 1 hour. Supernatants were cooled on ice and neutralized with 10M concentrated HCl, followed by 10,000g centrifugation for 5 min. The supernatants were then collected without lipid content. Hepatic hydroxyproline was measured with Hydroxyproline Assay Kit (Catalog ab222941, Abcam, USA) according to the manufacturer's instruction.

**RNA isolation and quantitative real-time PCR.** Total RNA was isolated from cell lysates or mouse liver tissues using the standard TRIzol method according to the manufacturer's instructions (Invitrogen). First-strand cDNA was synthesized from each RNA sample using the Reverse Transcription System (Promega). Oligo dT was used to prime cDNA synthesis. To analyze gene expression, quantitative real-time PCR (qRT-PCR) was performed using an SYBR Green Premix Ex Taq (Takara Biotechnology) on LightCycler 480 (Roche, Basel, Switzerland). Relative quantification analysis of gene expression data was calculated according to the  $2^{-\Delta\Delta Ct}$  method. The results of relative expression were normalized to mRNA levels of housekeeping gene Rplp0. The primer sequences for qRT-PCR are listed in Supplemental Table 4.

**Immunoprecipitation and mass spectrometry.** The standard immunoprecipitation (IP) purification procedure has been described in our previous study (1). In brief, Hepa1-6 cells transfected with adenovirus expressing Flag-tagged Sparcl1 or empty vector (control) were lysed in lysis buffer (50 mmol/L Tris-HCl [pH 7.5], 150 mmol/L NaCl, 0.5% Nonidet-P40) with gentle rocking at 4°C for 30 min. The cell clumps were removed via high-speed centrifugation. The supernatant was filtered through a 0.45µm filter membrane and subjected to IP with 50 mL of anti-Mouse IgG beads at 4°C for 4 hour. The samples were centrifuged to remove the beads and then subjected to IP with 50 mL of anti-Flag M2 beads (Catalog M8823, Sigma-Aldrich, USA) overnight at 4°C. Beads containing immune complexes were washed with 1 mL ice-cold lysis buffer. The immune complexes were eluted with 100 mL 3X Flag peptide. The precipitated proteins were subjected to SDS-PAGE and visualized by Coomassie brilliant

blue staining. Proteins were digested in gel with trypsin. Tryptic peptides were extracted from the gel pieces and vacuum centrifuged to dryness. The peptides were then analyzed by an EASY-nLC 1000 system connected to an Orbitrap Fusion mass spectrometer (ThermoFisher Scientific, Waltham, MA, USA). The raw spectra data were processed by Thermo Proteome Discoverer 2.1 and MS/MS spectra data were searched against the Uniprot mouse database by Mascot (v.2.4; Matrix Science, London, U.K.).

**Western blots.** Proteins from tissues or cells were harvested using radioimmunoprecipitation buffer containing Tris-HCl (50 mmol/L), NaCl (150 mmol/L), MgCl<sub>2</sub> (5 mmol/L), EDTA (2 mmol/L), NaF (1 mmol/L), 1% NP40 and 0.1% SDS. Cytoplasmic and nuclear protein fractions were prepared with the NE-PER Nuclear and Cytoplasmic Extraction Kit (Thermo Fisher Scientific) according to the manufacturer's instructions. The protein concentrations were quantified using commercial kits from Thermo Fisher Scientific. All protein samples were equally subjected to 10% SDS polyacrylamide gels, transferred to polyvinylidene difluoride membranes by electrophoresis, incubated with primary and secondary antibodies, and finally visualized by a chemiluminescence detection kit (Millipore). The following primary antibodies were purchased: anti-phospho-P65 at 1:2000 (catalog 3033, Cell Signaling Technology), anti-total P65 at 1:2000 (catalog 8242, Cell Signaling Technology), anti-phospho-Akt at 1:3000 (S473) (catalog 4060, Cell Signaling Technology), anti-total Akt at 1:2000 (catalog 4691, Cell Signaling Technology), anti-histone H3 at 1:5000 (catalog 4499, Cell Signaling Technology), and anti-GAPDH antibody at 1:8000 (catalog KC5G5, Kangchen Technology), anti- $\alpha$  tubulin at 1:3000

(catalog ab7291, Abcam), anti-Flag at 1:5000 (catalog F1804, Sigma-Aldrich), anti-HA at 1:2000 (catalog 3724S, Cell Signaling Technology).

***Plasmid construction and luciferase reporter assays.*** Flag- or HA-tagged full-length mouse Sparcl1 and TLR4 were obtained by PCR amplification of the cDNA from mouse liver and cloned into pCMV vector with HindIII/BamHI restriction sites. pNF- $\kappa$ B-luciferase reporter plasmid containing multiple NF- $\kappa$ B/P65 binding sites was purchased from Beyotime company (catalog D2206, Shanghai, China). For the luciferase reporter assays, transfection experiments were performed on Hepa1-6 or RAW264.7 cells at 70-80% confluence using Lipofectamine 3000 (Invitrogen) and luciferase activity was measured using the Dual Luciferase Reporter Assay System (Promega). All of cell lines were purchased from Cell Bank of Typical Culture Preservation Committee, Chinese Academy of Sciences, Shanghai (Shanghai, China).

***Chromatin immunoprecipitation assays.*** ChIP experiments in Hepa1-6 cells were performed using commercial kits following the manufacturer's protocols (MilliporeSigma). In brief, cells were treated with recombinant Sparcl1 protein or PBS for 4 hours. Then, cells were fixed with 1% formaldehyde and harvested in SDS lysis buffer. DNA was sheared to fragments of 200-1000 bp using sonication. Chromatin was incubated and precipitated with antibodies against P65 (catalog 8242, Cell Signaling Technology) or IgG (catalog ab172730, Abcam). After removing with protein G agarose, the DNA was purified and subjected to quantitative real-time PCR. The primer sequence was used to amplify the distal regulatory region of CCL2 promoter as previously described (2).

***Sparcl1 neutralizing antibody.*** The hybridoma cell lines secreting mouse mAb against mouse Sparcl1 were generated according to the standard hybridoma technique (3). The mouse mAbs were purified by Protein A affinity chromatograph, and its purity was measured by high-pressure liquid chromatography. The Mouse IgG ELISA Kit (Bethyl Laboratories) was used to measure the concentration of the obtained antibody, according to the manufacturer's instructions. A Biacore T100 instrument was used to analyze the kinetic parameters of the antibody. The purified antibody was diluted in saline and injected intravenously into NASH mice (5 mg/kg) twice per week for 4 weeks.

## Supplementary Figures 1-16

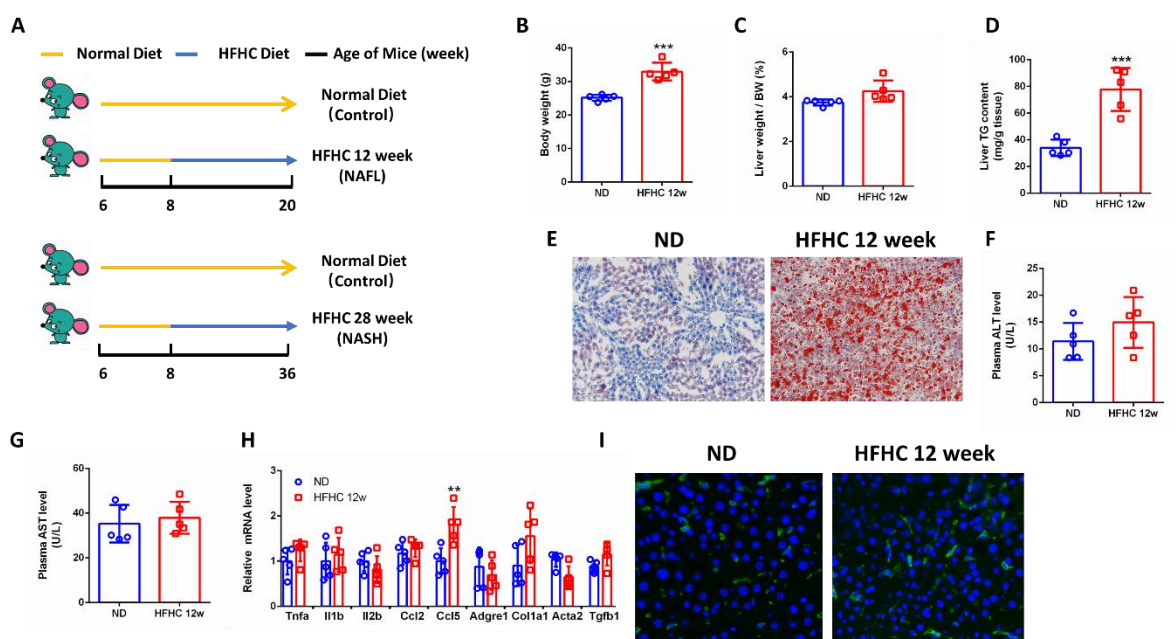

Supplementary Figure 1

**Supplementary Figure 1. Metabolic phenotypes of NAFL mice.** C57BL/6 mice were fed a normal diet (ND) or HFHC-diet for 12 or 28 weeks, starting at 8 week of age.  $n=5$  per group. The results of mice fed a HFHC-diet for 12 weeks were shown in Supplementary Figure 1. The results of mice fed a HFHC-diet for 28 weeks were shown in Supplementary Figure 2.

(A) Scheme for the experimental strategy. (B) Body weight. (C) Liver/body weight ratio. (D) Liver triglyceride contents. (E) Oil Red O staining of liver sections. (F-G) Plasma ALT (F) and AST (G) levels. (H) Relative mRNA levels of hepatic genes involved in inflammation and fibrosis. (I) F4/80 staining of liver sections. Data are represented as mean  $\pm$  SEM. \*\*  $P < 0.01$ , \*\*\*  $P < 0.001$ . 2-tailed Student's t test (B-D, F-H). (E, I) Original magnification,  $\times 200$ .

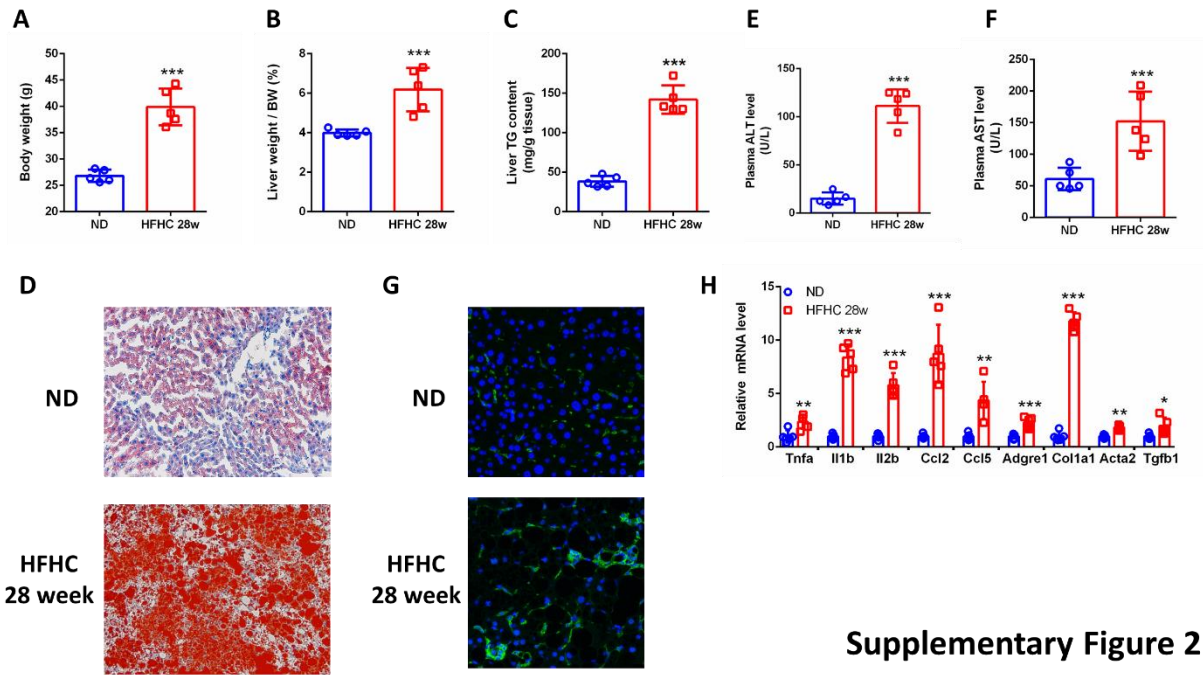

**Supplementary Figure 2**

**Supplementary Figure 2. Metabolic phenotypes of NASH mice.** C57BL/6 mice were fed a normal diet (ND) or HFHC-diet for 28 weeks, starting at 8 week of age. n=5 per group. (A) Body weight. (B) Liver/body weight ratio. (C) Liver triglyceride contents. (D) Oil Red O staining of liver sections. (E-F) Plasma ALT (E) and AST (F) levels. (G) F4/80 staining of liver sections. (H) Relative mRNA levels of hepatic genes involved in inflammation and fibrosis. Data are represented as mean  $\pm$  SEM. \*  $P < 0.05$ , \*\*  $P < 0.01$ , \*\*\*  $P < 0.001$ . 2-tailed Student's t test (A-C, E-F, H). (D, G) Original magnification,  $\times 200$ .



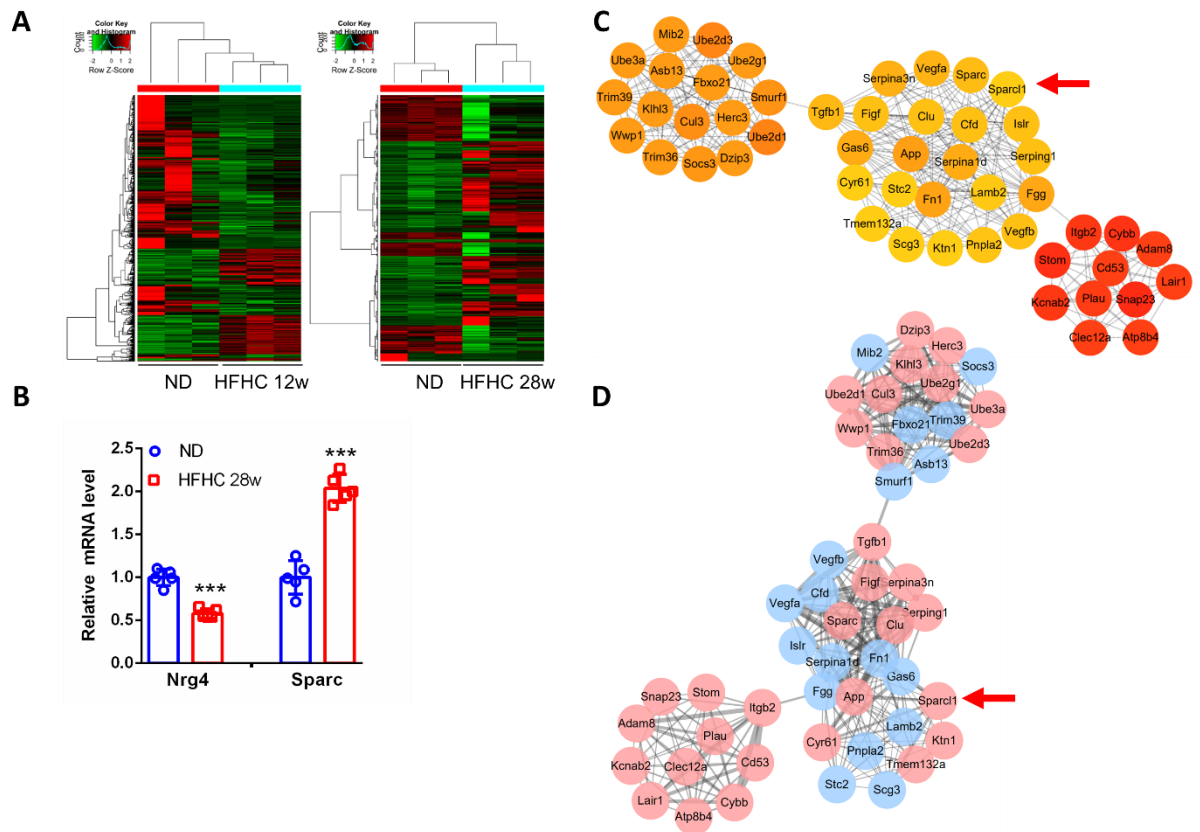

Supplementary Figure 3

**Supplementary Figure 3. RNA-sequencing analysis of the livers from two groups of mice.** (A) Heat map of genes in the eWAT from mouse models of NAFL (HFHC diet for 12 weeks) or NASH (HFHC diet for 28 weeks) with their controls (normal diet), respectively. (B) Relative mRNA levels of Nrg4 and Sparc in eWAT of mice fed a normal diet or HFHC diet for 28 weeks. (C) Hub genes analyzed by the cytoHubba plugin in Cytoscape. (D) Correlation between Sparc1 and the DEGs as illustrated by MCODE based on the PPI network. Data are represented as mean  $\pm$  SEM. \*\*\*  $P < 0.001$ . 2-tailed Student's t test (B).

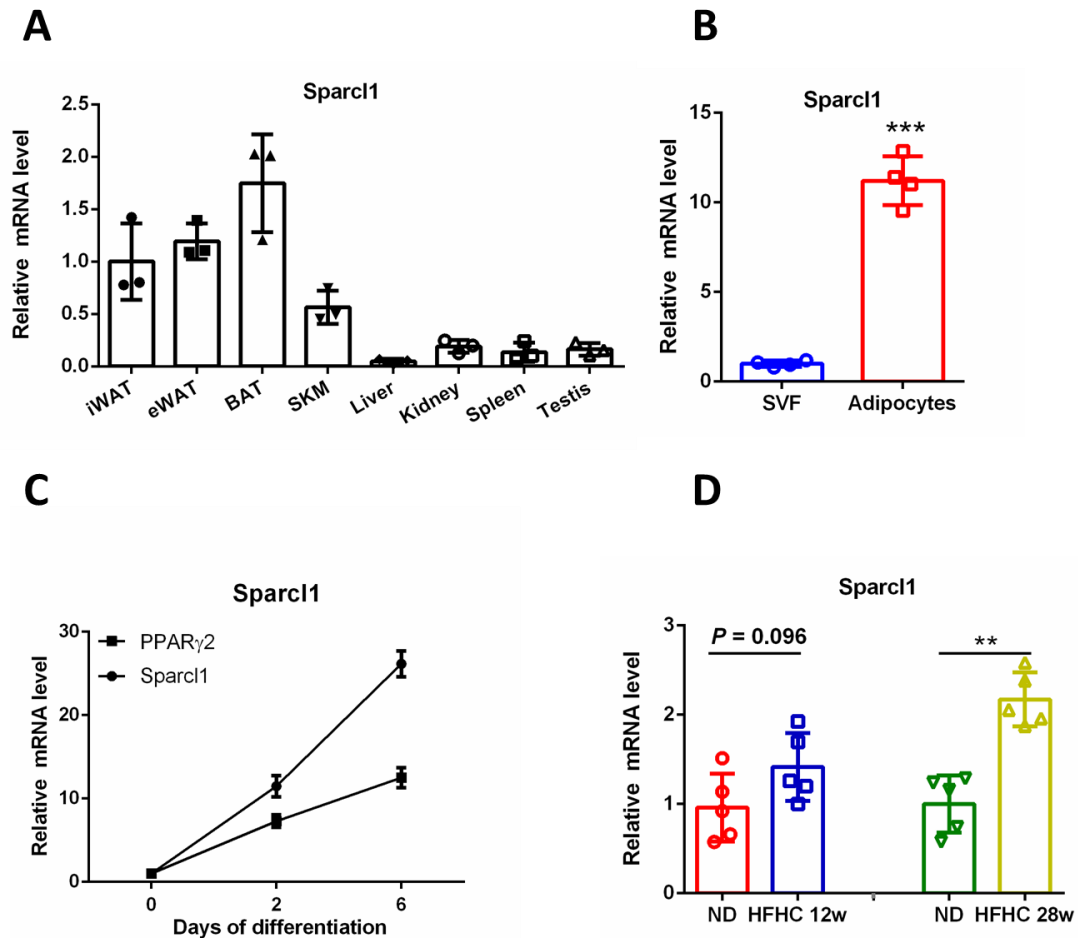

**Supplementary Figure 4**

**Supplementary Figure 4. Sparcl1 expression analysis.** (A) Relative mRNA levels of Sparcl1 in various tissues from 10-week-old C57BL/6 male mice. n=3. (B) Relative mRNA levels of Sparcl1 in stromal vascular fractions (SVF) and mature adipocytes from 10-week-old C57BL/6 male mice. n=4. (C) Sparcl1 expression in 3T3-L1 cells during differentiation. n=4. (D) Relative mRNA levels of Sparcl1 in the livers from mice fed with normal diet or HFHC diet for 12 weeks or 28 weeks. n=5 per group. \*\*  $P < 0.01$ , \*\*\*  $P < 0.001$ . 1-way ANOVA (A,C). 2-tailed Student's t test (B, D).

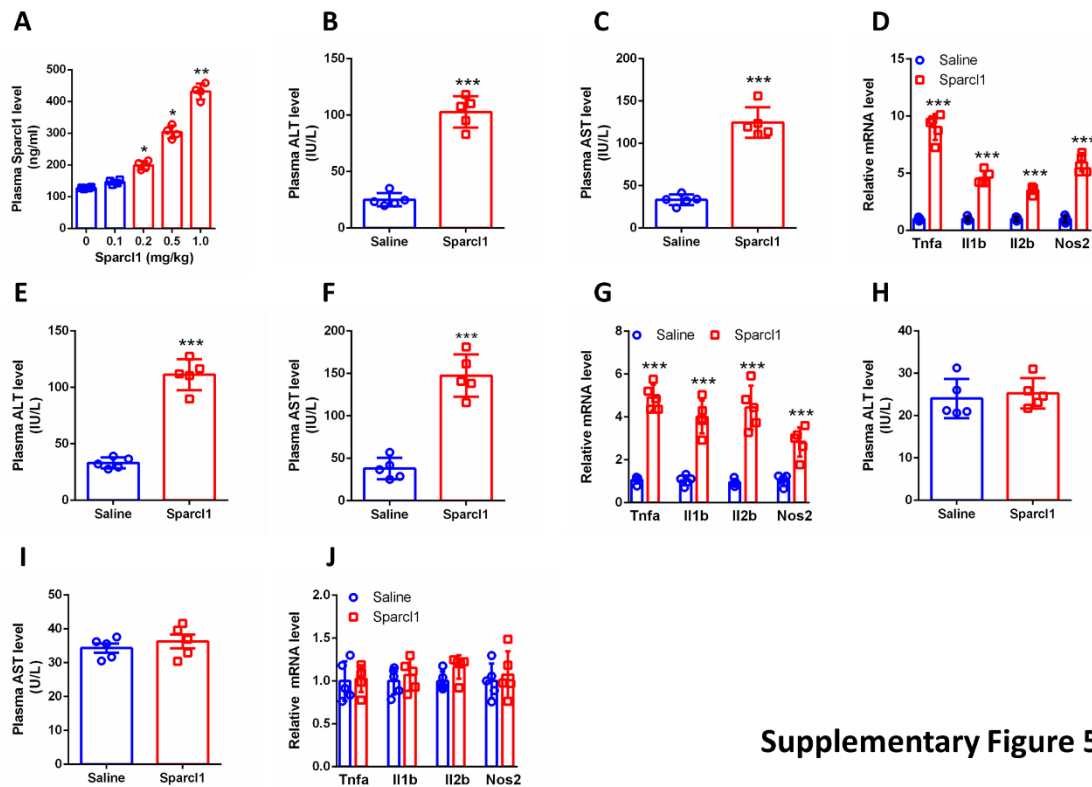

**Supplementary Figure 5**

**Supplementary Figure 5. Acute treatment of recombinant Sparcl1 protein in mice.** (A) Plasma Sparcl1 levels in C57BL/6 male mice injected with different dose of Sparcl1 as indicated. n=4 per group. (B-D) C57BL/6 male mice were fed a HFHC-diet for 12 weeks and then treated with a single dose of recombinant Sparcl1 protein (0.2 mg/kg) or vehicle control (saline) for 8 hr. n=5 per group. (B-C) Plasma ALT (B) and AST (C) levels. (D) Relative mRNA levels of inflammatory genes in the livers. (E-G) C57BL/6 male mice were fed a HFD diet for 12 weeks and then treated with a single dose of recombinant Sparcl1 protein (0.2 mg/kg) or vehicle control (saline) for 8 hr. n=5 per group. (E-F) Plasma ALT (E) and AST (F) levels. (G) Relative mRNA levels of inflammatory genes in the livers. (H-J) C57BL/6 male mice were treated with a single dose of recombinant Sparcl1 protein (0.2mg/kg) or vehicle control (saline) for 8 hr. n=5 per group. (H-I) Plasma ALT (H) and AST (I) levels. (J) Relative mRNA levels of inflammatory genes in the livers. Data are represented as mean  $\pm$  SEM. \*  $P < 0.05$ , \*\*  $P < 0.01$ , \*\*\*  $P < 0.001$ . 1-way ANOVA (A). 2-tailed Student's t test (B-J).

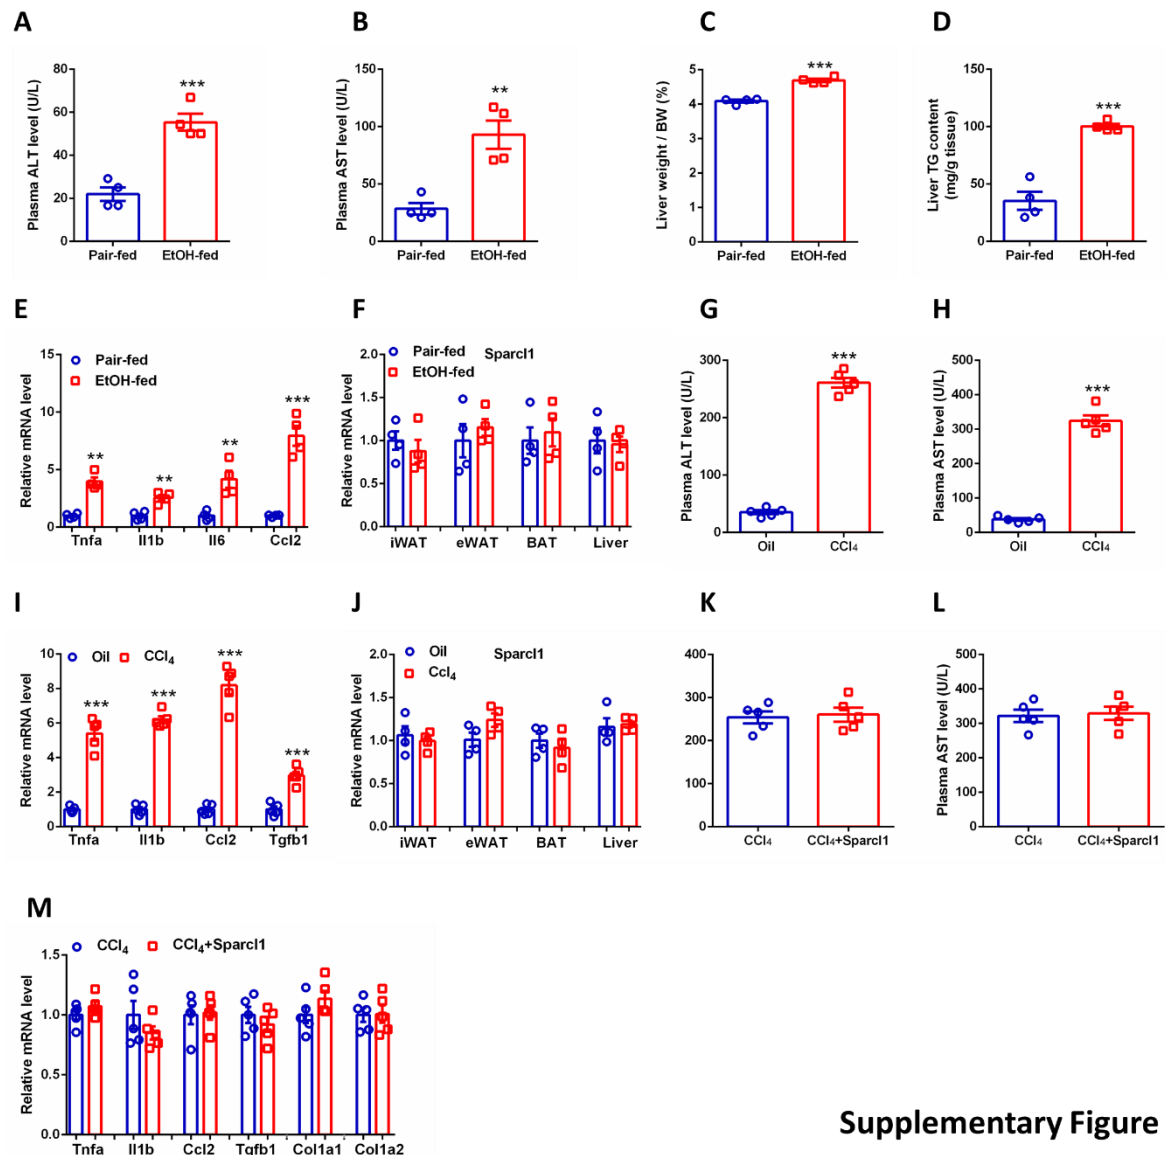

Supplementary Figure 6

**Supplementary Figure 6. Sparcl1 treatment has little effect in the ethanol feeding mice or CCl<sub>4</sub>-treated mice.** (A-F) Mouse model of chronic-plus-binge ethanol feeding was generated according to the NIAAA (National Institute on Alcohol Abuse and Alcoholism) procedure as described previously (4). n=4 per group. (A-B) Plasma ALT (A) and AST (B) levels. (C) Liver/body weight ratio. (D) Liver triglyceride contents. (E) Relative mRNA levels of inflammatory genes in the livers. (F) Relative mRNA levels of Sparcl1 in the iWAT, eWAT, BAT and liver. (G-J) C57BL/6 male mice were intraperitoneal administered with CCl<sub>4</sub> (1 ml/kg, 1:4 v/v

in corn oil) twice a week for 6 weeks. Mice were sacrificed 2 days after the last Ccl<sub>4</sub> injection. n=5 per group. (G-H) Plasma ALT (G) and AST (H) levels. (I) Relative mRNA levels of inflammatory genes in the livers. (J) Relative mRNA levels of Sparcl1 in the iWAT, eWAT, BAT and liver. (K-M) C57BL/6 male mice were administered with CCl<sub>4</sub> for 6 weeks and then treated with a single dose of recombinant Sparcl1 protein (0.2mg/kg) or vehicle control (saline) for 8 hr. n=5 per group. (K-L) Plasma ALT (K) and AST (L) levels. (M) Relative mRNA levels of genes involved in liver inflammation and fibrosis. Data are represented as mean ± SEM. \*\*  $P < 0.01$ , \*\*\*  $P < 0.001$ , 2-tailed Student's t test (A-M).

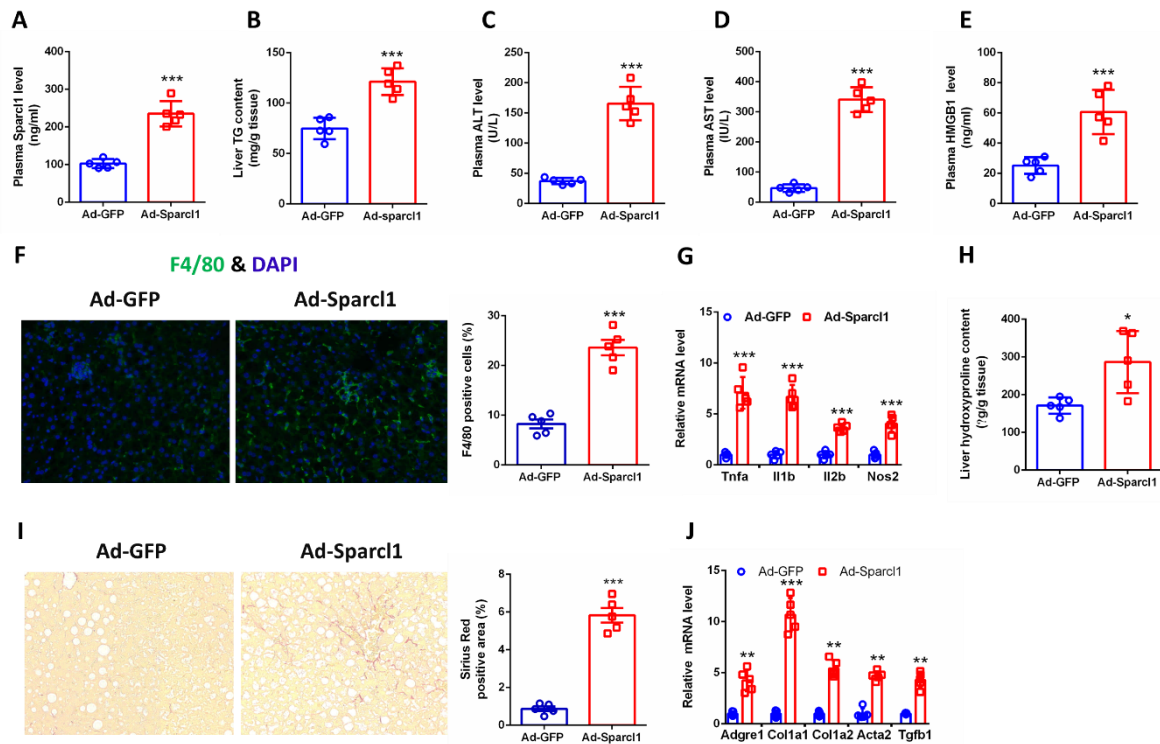

**Supplementary Figure 7**

**Supplementary Figure 7. Effects of adenovirus-mediated overexpression of Sparcl1 in mice.** C57BL/6 mice were fed a HFHC-diet for 12 weeks, starting at 8 week of age. Then,  $4 \times 10^9$  pfu of Ad-GFP or Ad-Sparcl1 was injected bilaterally s.c. into the inguinal fat pads of mice. n=5 per group. (A) Plasma Sparcl1 levels. (B) Hepatic triglyceride contents. (C-E) Plasma levels of ALT (C), AST (D), and HMGB1 (E). (F) F4/80 staining of liver sections and quantification of the F4/80 images. (G) Relative mRNA levels of hepatic inflammatory genes. (H) Liver hydroxyproline content. (I) Sirius red staining of liver sections and quantification of the images. (J) Relative mRNA levels of genes involved in liver fibrosis. Data are represented as mean  $\pm$  SEM. \*  $P < 0.05$ , \*\*  $P < 0.01$ , \*\*\*  $P < 0.001$ . 2-tailed Student's t test (A-J). (F, I) Original magnification,  $\times 200$ .

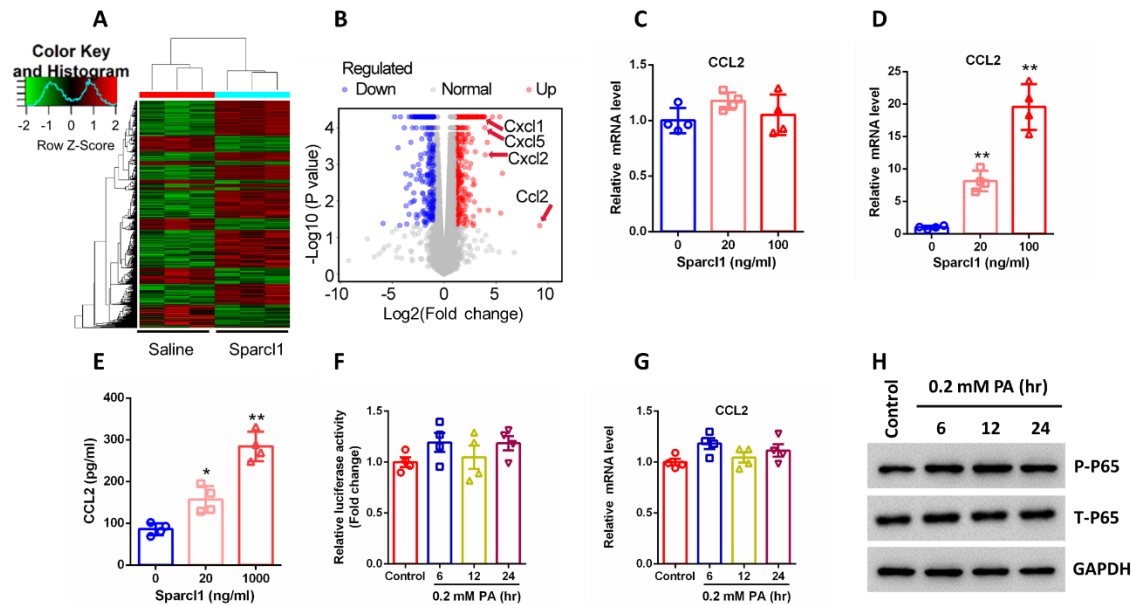

Supplementary Figure 8

**Supplementary Figure 8. Analysis of CCL2 expression and inflammatory response by Sparcl1 treatment.** (A) Heat map of genes in the livers of HFHC-diet-fed mice chronically treated with recombinant Sparcl1 protein or vehicle control (saline) as described in Figure 3A. (B) Volcano plot of gene expression analysis of livers from Sparcl1- or saline-treated mice. (C) Relative mRNA levels of CCL2 in Hepa1-6 cells exposure to different dose of Sparcl1 protein for 12 hr. n=4 per group. (D) Relative mRNA levels of CCL2 in Hepa1-6 cells. Cells were pre-incubated with palmitate (0.2 mM) for 12 hr, and then treated with Sparcl1 protein for another 12 hr. n=4 per group. (E) CCL2 concentrations in the medium of Hepa1-6 cells. Cells were pre-incubated with palmitate (0.2 mM) for 12 hr, and then treated with Sparcl1 protein for another 24 hr. n=4 per group. (F) Relative luciferase activity in Hepa1-6 cells transfected with pNF- $\kappa$ B-luciferase reporter plasmid. Cells were incubated with palmitate (0.2mM) or vehicle control (BSA) for different hours. n=4 per group. (G) Relative mRNA levels of CCL2 in Hepa1-6 cells treated with palmitate or vehicle control. n=4 per group. (H) Western blot showing the expression of phosphorylated P65 in hepa1-

6 cells treated with palmitate or vehicle control. Data are represented as mean  $\pm$  SEM. \*  $P < 0.05$ , \*\*  $P < 0.01$ . (A-B):  $n=3$  per group. 1-way ANOVA (C-G).



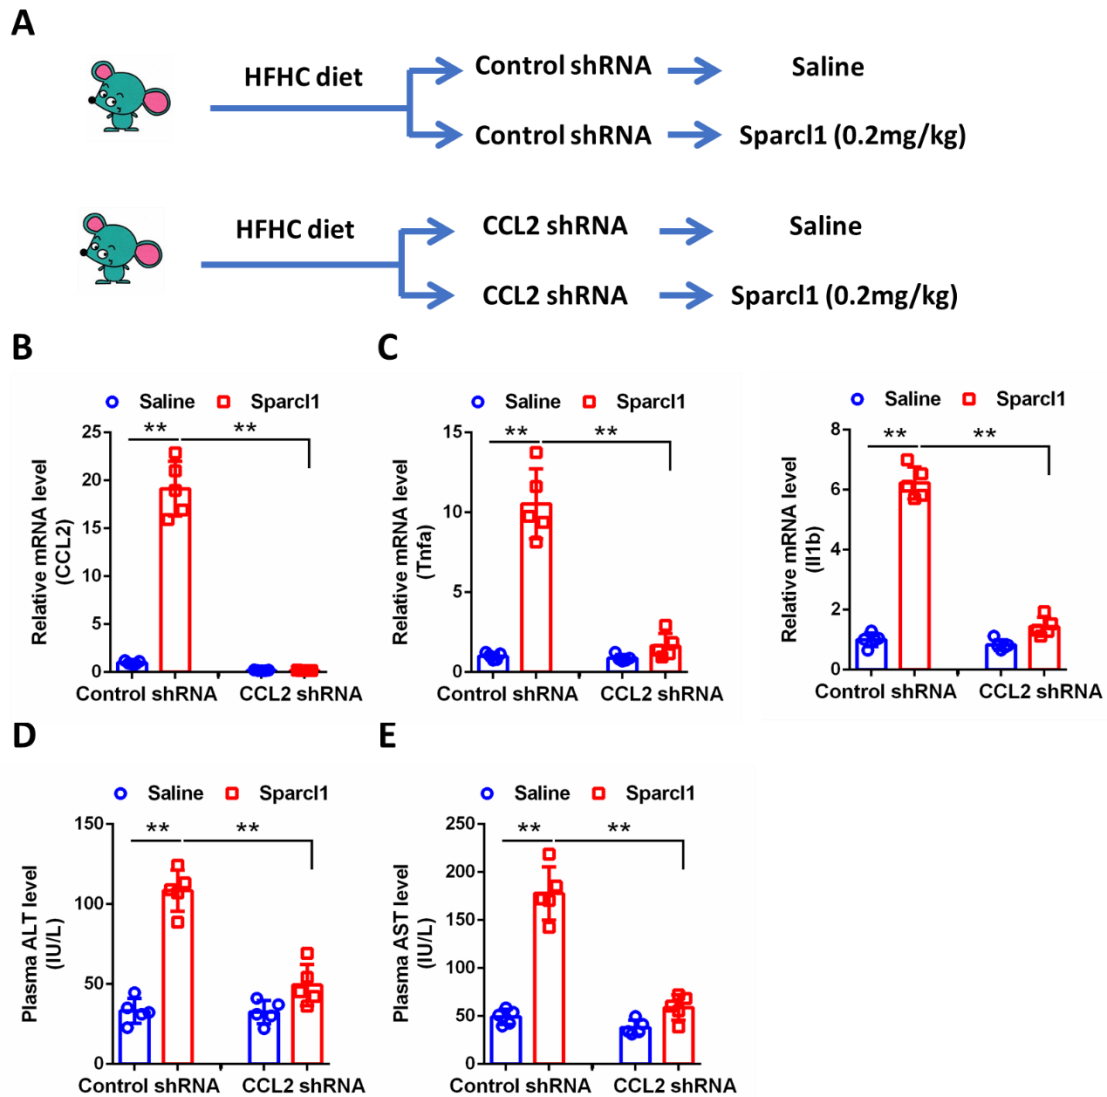

### Supplementary Figure 9

**Supplementary Figure 9. Knockdown of CCL2 attenuated the role of Sparcl1 treatment.** C57BL/6 mice were fed a HFHC-diet for 12 weeks, starting at 8 week of age. n=5 per group. Then, mice were administered with  $2 \times 10^9$  pfu of CCL2 shRNA adenovirus or control shRNA adenovirus by tail vein injection, respectively. 10 days later, mice were treated with a single dose of Sparcl1 (0.2mg/kg) or vehicle control. (A) Scheme for the experimental strategy. (B) Relative mRNA levels of CCL2 in the liver. (C) Relative mRNA levels of inflammatory genes in the liver (TNF $\alpha$  and IL1 $\beta$ ). (D-E) Plasma levels of ALT (D) and AST (E). Data are represented as mean  $\pm$  SEM. \*\*  $P < 0.01$ . 1-way ANOVA (B-E).

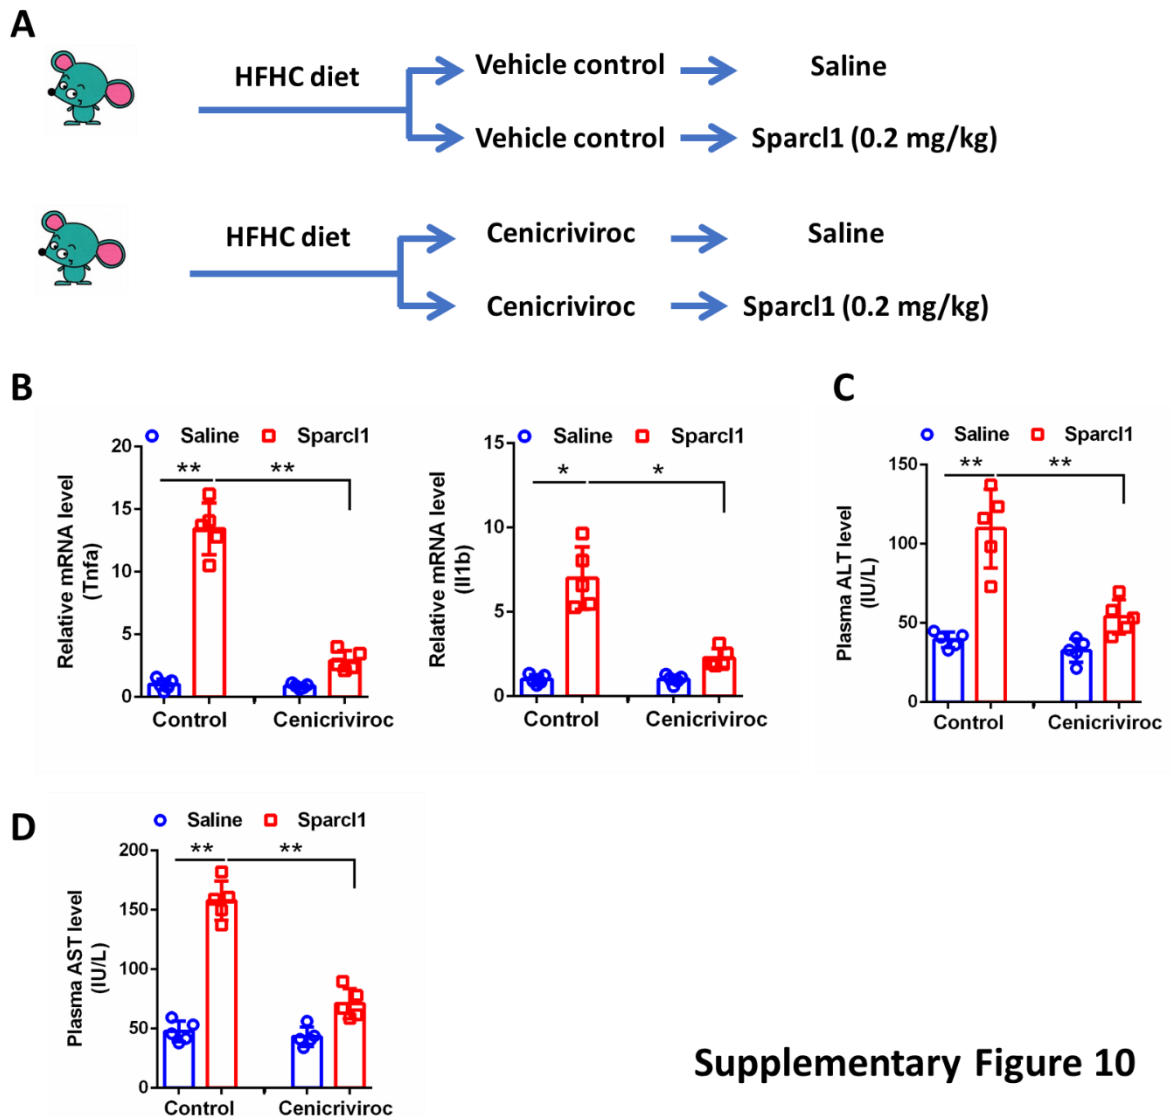

**Supplementary Figure 10**

**Supplementary Figure 10. Cenicriviroc treatment attenuated the role of Sparcl1.** C57BL/6 mice were fed a HFHC-diet for 12 weeks, starting at 8 week of age. Then, mice were daily administered with cenicriviroc (30 mg/kg) or vehicle control by intraperitoneal injections. 6 days later, mice were treated with a single dose of Sparcl1 (0.2 mg/kg) or vehicle control. n=5 per group. (A) Scheme for the experimental strategy. (B) Relative mRNA levels of inflammatory genes in the liver (TNF $\alpha$  and IL1 $\beta$ ). (C-D) Plasma levels of ALT (C) and AST (D). Data are represented as mean  $\pm$  SEM. \*  $P < 0.05$ , \*\*  $P < 0.01$ . 1-way ANOVA (B-D).

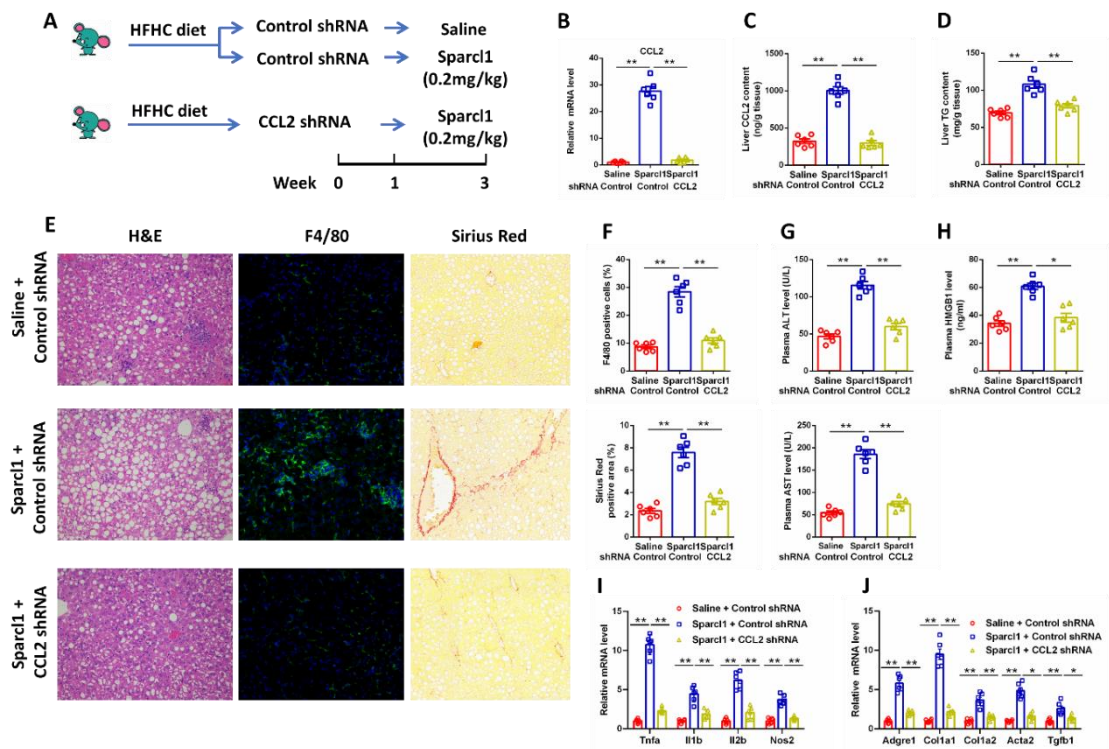

**Supplementary Figure 11. Knockdown of CCL2 ameliorated the pathogenic roles of chronic Sparcl1 treatment.** C57BL/6 mice were fed a HFHC-diet for 12 weeks, starting at 8 week of age. Then, mice were administered with  $2 \times 10^{11}$  pfu of CCL2 AAV-shRNA or control AAV-shRNA by tail vein injection, respectively. One week later, mice were intraperitoneal injected with saline or recombinant Sparcl1 protein (0.2mg/kg) every other day for another 3 weeks. n=6 per group. (A) Scheme for the experimental strategy. (B) Relative mRNA levels of CCL2 in the livers. (C) Plasma CCL2 concentrations. (D) Hepatic triglyceride contents. (E) H&E staining, F4/80 and Sirius red staining of liver sections. (F) Quantification of the F4/80 and Sirius red images. (G) Plasma ALT and AST levels. (H) Plasma HMGB1 levels. (I-J) Relative mRNA levels of hepatic genes involved in inflammation (I) and fibrosis (J). Data are represented as mean  $\pm$  SEM. \*  $P < 0.05$ , \*\*  $P < 0.01$ . 1-way ANOVA (B-D, F-J). (E) Original magnification,  $\times 200$ .

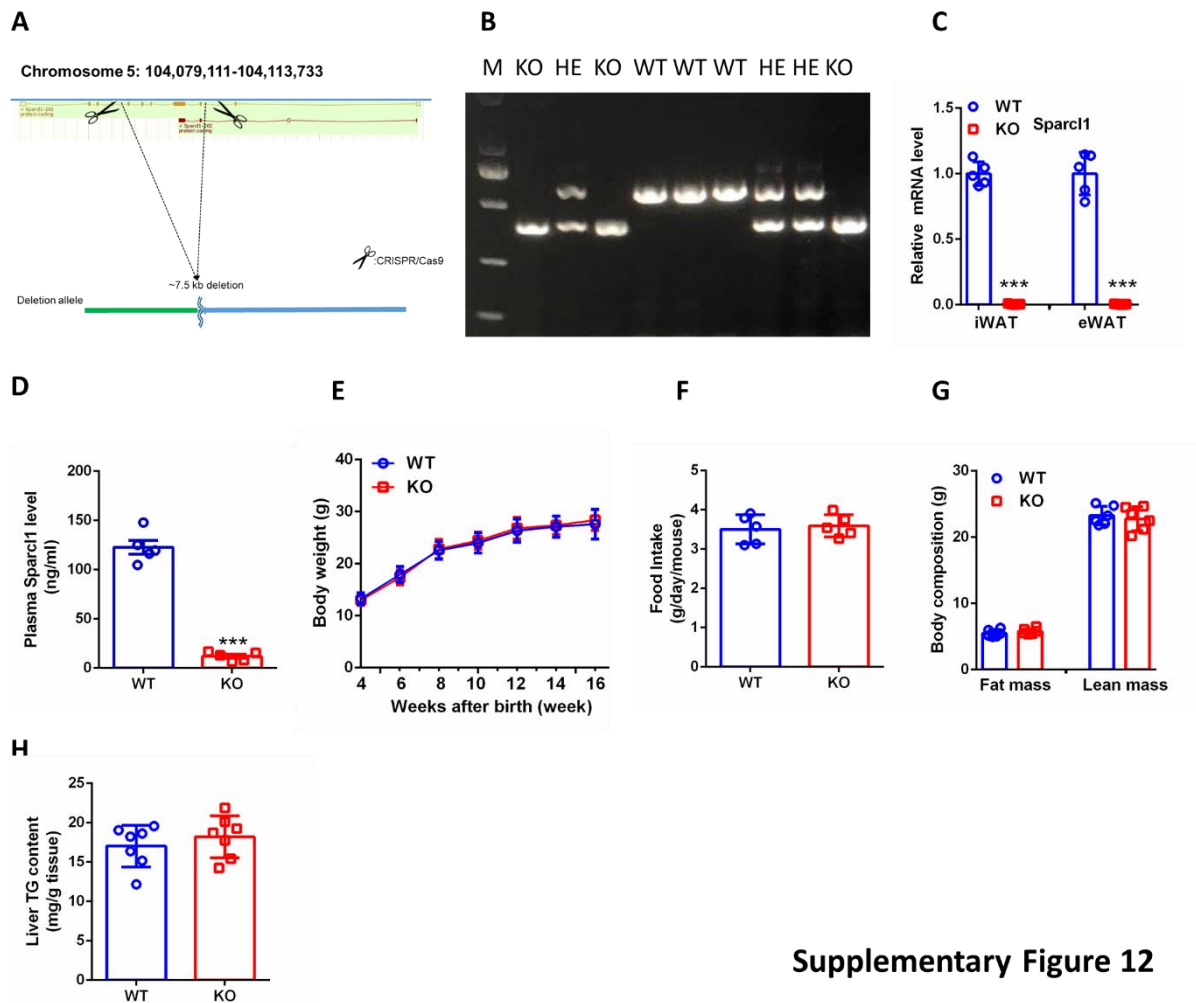

**Supplementary Figure 12**

**Supplementary Figure 12. Metabolic phenotypes of Sparcl1 wild-type and knockout mice under normal diet.** (A) Generation of Sparcl1 knockout mice by the CRISPR/Cas9 system. (B) Genotyping of wild-type (WT), heterozygous (HE) and knockout (KO) mice by PCR. M: DNA marker. (C) Relative mRNA levels of Sparcl1 in the iWAT and eWAT from WT and KO mice. n=5 per group. (D) Plasma Sparcl1 levels from WT and KO mice. n=5 per group. (E-H) Body weights (E), food intake (F), body composition (G), and hepatic triglyceride contents (H) in WT and KO mice. n=5-7 per group. Data are represented as mean  $\pm$  SEM. \*\*\*  $P < 0.001$ . 2-tailed Student's t test (C-H).

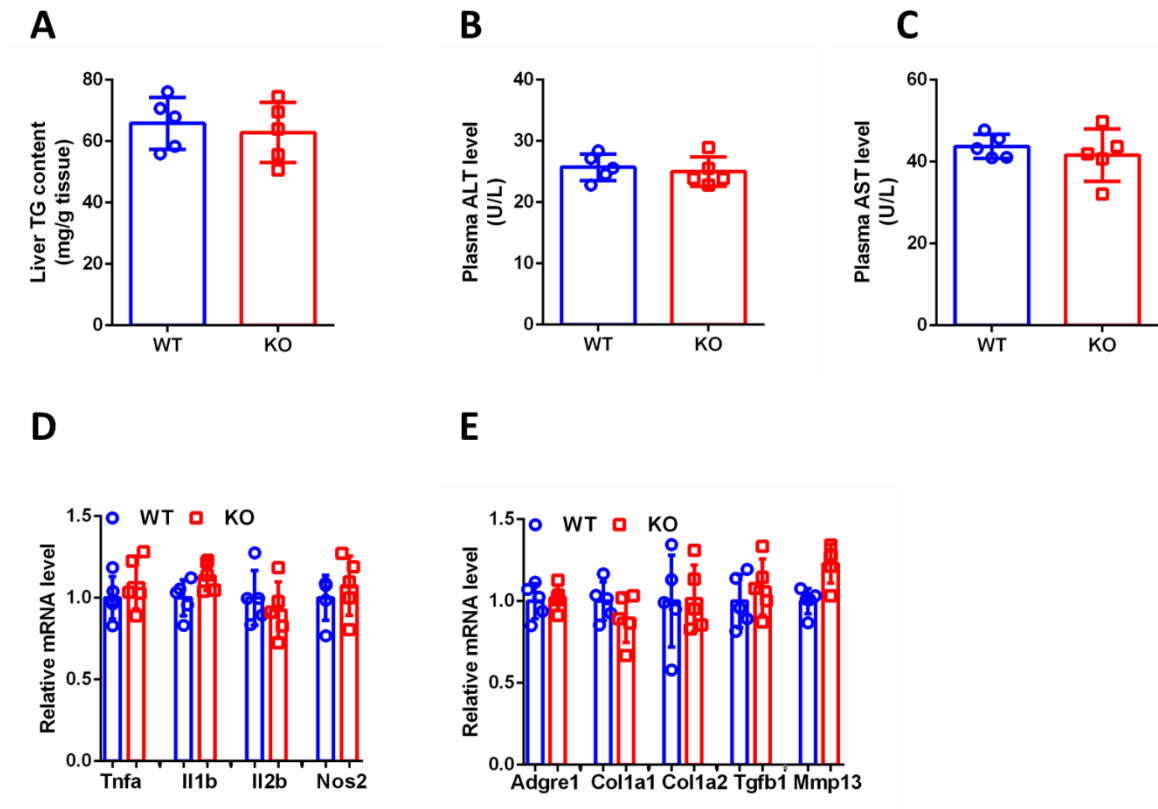

**Supplementary Figure 13**

**Supplementary Figure 13. Metabolic phenotypes of Sparcl1 wild-type and knockout mice under HFHC-diet for 12 weeks.** Sparcl1 WT and KO male mice were fed a HFHC-diet for 12 weeks, starting at 8 week of age. n=5 per group. (A-C) Hepatic triglyceride contents (A), plasma ALT (B) and AST (C) levels in WT and KO mice. (D-E) Relative mRNA levels of genes involved in inflammation (D) and fibrosis (E) in the livers of WT and KO mice. Data are represented as mean  $\pm$  SEM. 2-tailed Student's t test (A-E).

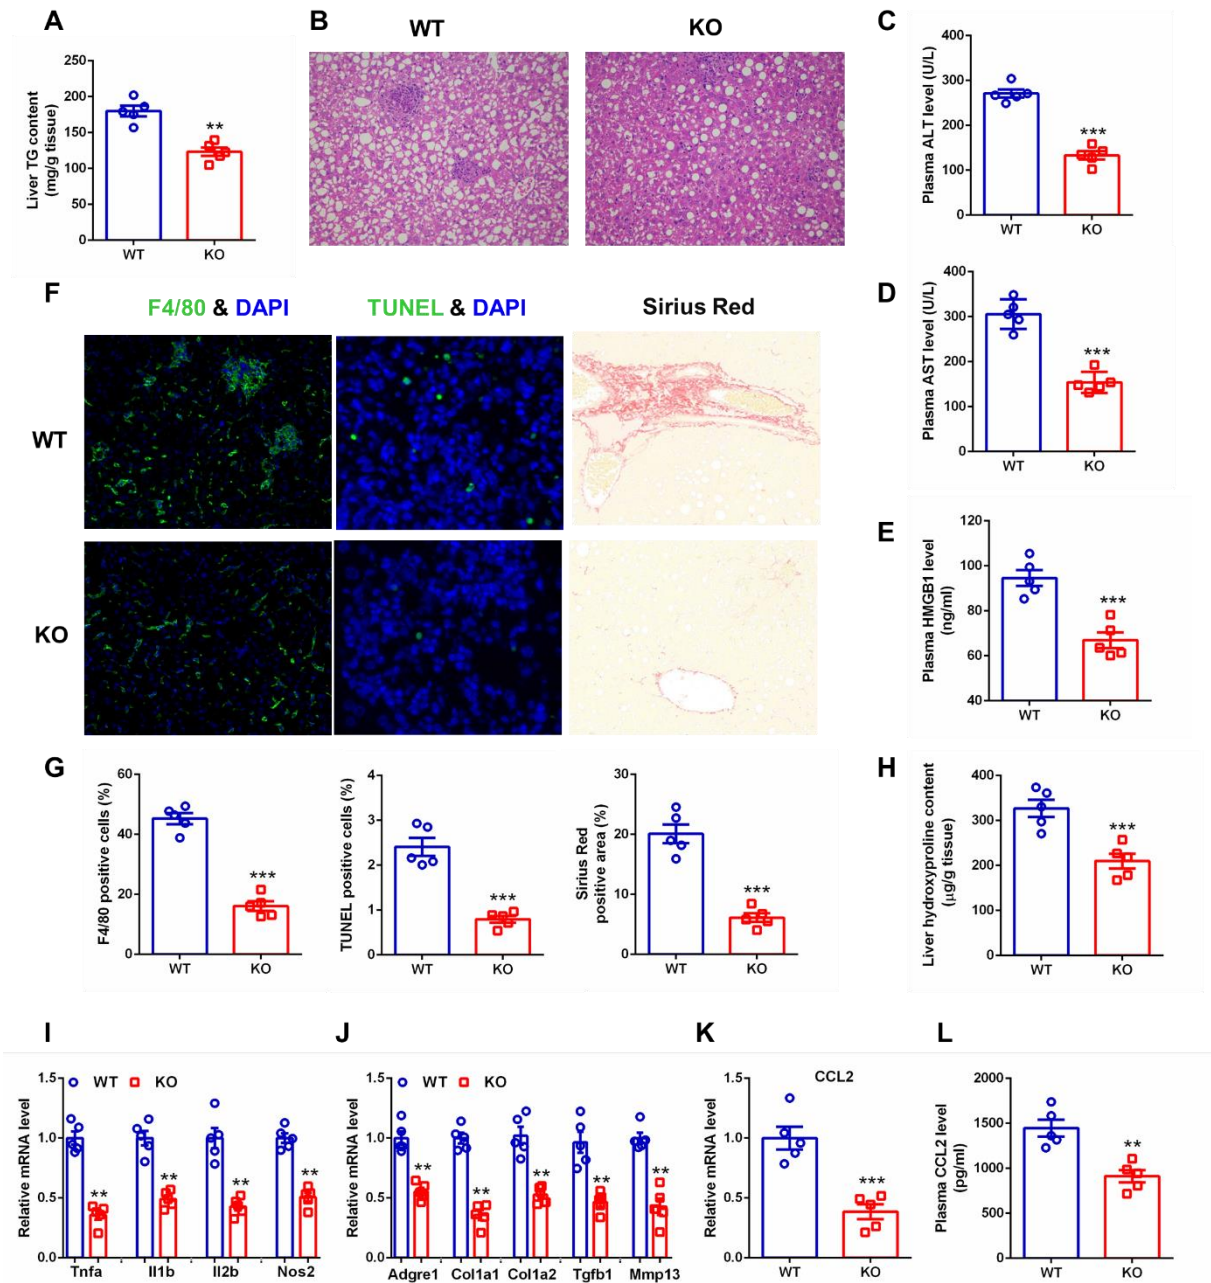

Supplementary Figure 14

**Supplementary Figure 14. Metabolic phenotypes of Sparcl1 wild-type and knockout mice under HFHC-diet for 36 weeks.** Sparcl1 wild-type (WT) and knockout (KO) male mice were fed HFHC-diet for 36 weeks, starting at 8 week of age. n=5 per group. (A) Liver triglyceride contents. (B) H&E staining of liver sections. (C-E) Plasma levels of ALT (C), AST (D) and HMGB1 (E). (F) F4/80, TUNEL, and Sirius red staining of liver sections. (G) Quantification of the F4/80, TUNEL and Sirius red staining images. (H) Liver

hydroxyproline content. (I-J) Relative mRNA levels of genes involved in liver inflammation (I) and fibrosis (J). (K) Relative mRNA levels of CCL2 in the livers from two groups of mice. (L) plasma concentrations of CCL2 from two groups of mice. Data are represented as mean  $\pm$  SEM. \*\*  $P < 0.01$ , \*\*\*  $P < 0.001$ , 2-tailed Student's t test (A, C-E, G-L). (B, F) Original magnification,  $\times 200$ .

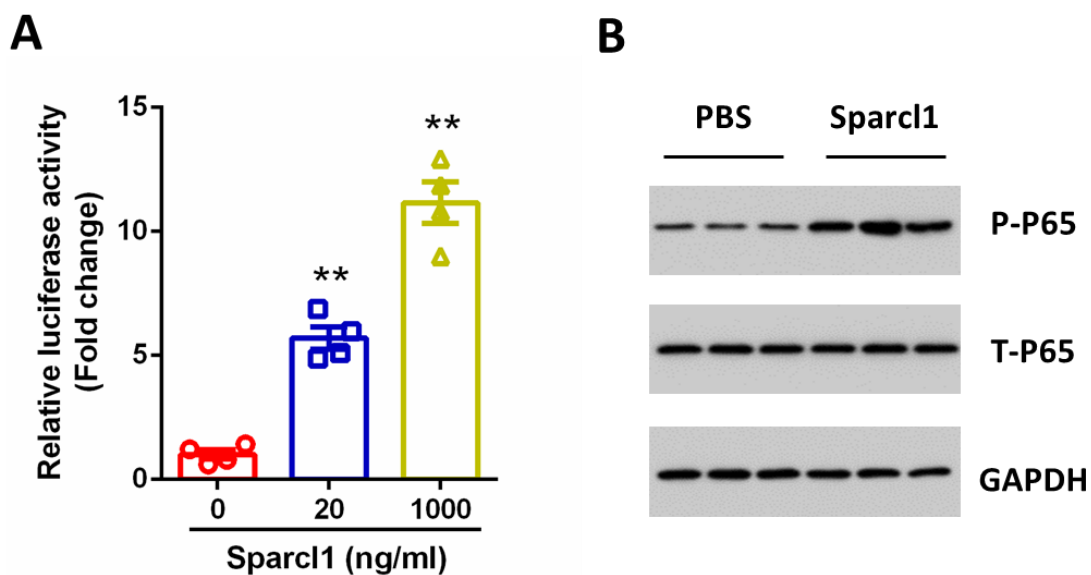

### Supplementary Figure 15

**Supplementary Figure 15. Inflammatory response induced by Sparcl1 treatment in RAW264.7 cells.** (A) Relative luciferase activity in RAW264.7 macrophage cells transfected with pNF- $\kappa$ B-luciferase reporter plasmid. Cells were incubated with Sparcl1 or vehicle control (PBS) for 24 hours. n=4 per group. (B) Western blot showing phosphorylated P65 in RAW264.7 macrophage cells treated with Sparcl1 or vehicle control (PBS). Data are represented as mean  $\pm$  SEM. \*\*  $P < 0.01$ , 1-way ANOVA (A).

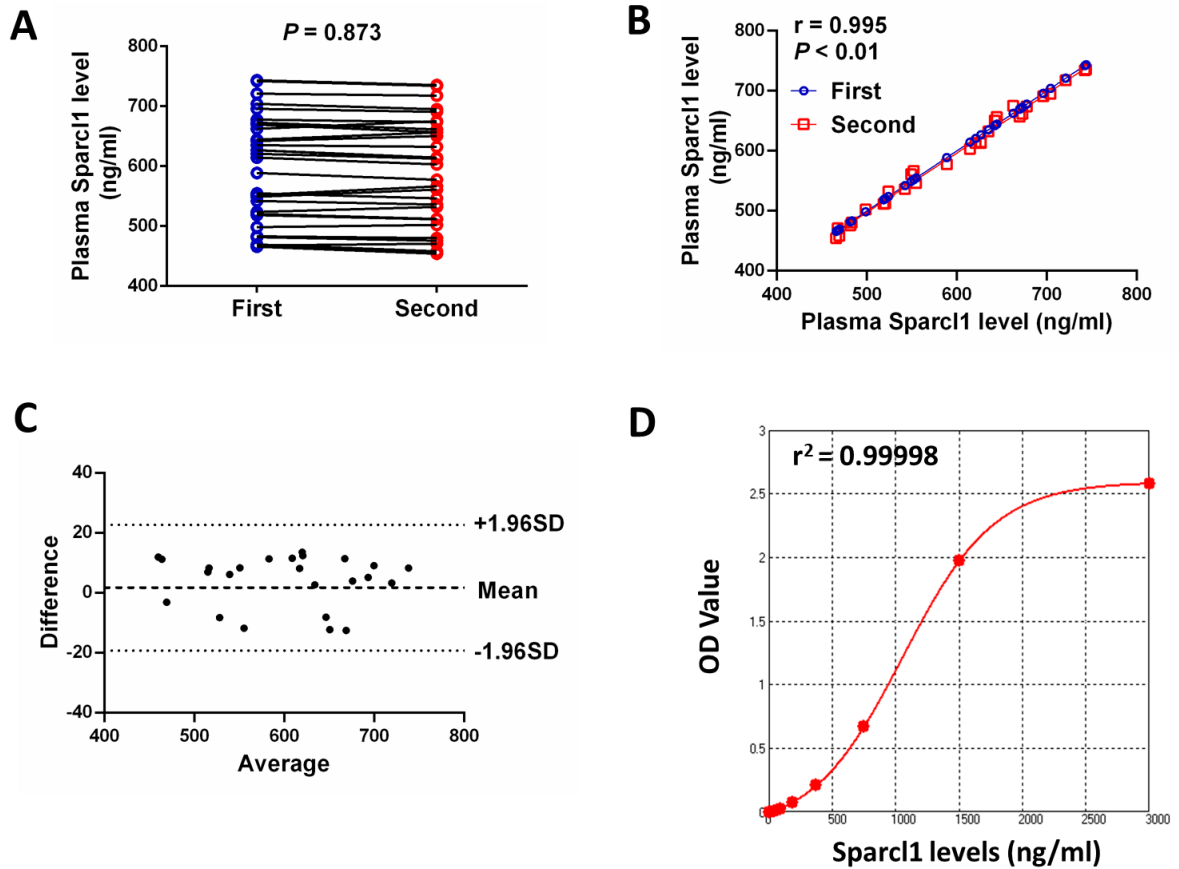

**Supplementary Figure 16**

**Supplementary Figure 16. ELISA assays of plasma Sparcl1 concentrations in humans.** Thirty plasma samples were randomly selected from healthy volunteers to measure Sparcl1 levels twice. The time interval between the two ELISA assays is more than 18 months. (A) Plasma Sparcl1 levels of the first and second assays were analyzed by Student's t test. (B) Spearman correlation analysis of the first and second assays. (C) Bland-Altman analysis of the first and second assays. (D) The standard curve of ELISA analysis.



**Supplementary Table 1.** RNA-Seq analysis showed the dysregulated genes in the eWAT of NAFL mice (NAFL vs Control) and NASH mice (NASH vs Control).

**392 genes were dysregulated in the eWAT of both mouse models.**

| Gene name  | log2 (fold change) | P value | Gene name | log2 (fold change) | P value | Gene name | log2 (fold change) | P value |
|------------|--------------------|---------|-----------|--------------------|---------|-----------|--------------------|---------|
| Actc1      | 6.75421            | 0.00005 | Ehd3      | 1.33155            | 0.00025 | Vnn3      | -0.86794           | 0.01920 |
| Tph2       | 6.22562            | 0.00005 | Polr3g    | 1.32312            | 0.00450 | Rbp4      | -0.89178           | 0.00735 |
| Ttn        | 6.17360            | 0.00005 | Ctsl      | 1.32180            | 0.00020 | Actn3     | -0.89302           | 0.02875 |
| Myl2       | 6.11599            | 0.00005 | Mmrn1     | 1.31698            | 0.00860 | Pcsk5     | -0.89862           | 0.00820 |
| Myoz2      | 5.58051            | 0.00005 | Pdk4      | 1.30800            | 0.00005 | Nupr1     | -0.90227           | 0.00630 |
| Ubd        | 5.40639            | 0.00005 | Duoxa1    | 1.30254            | 0.02440 | Fam210b   | -0.91156           | 0.02540 |
| Grem1      | 5.33672            | 0.02755 | Abcg3     | 1.29177            | 0.01840 | Coq10a    | -0.91481           | 0.01730 |
| Slc5a7     | 5.18457            | 0.00005 | Cap2      | 1.28299            | 0.04390 | Vit       | -0.92231           | 0.02715 |
| Lrrc2      | 4.86746            | 0.00045 | Serpinf1  | 1.28251            | 0.00025 | Syde2     | -0.92314           | 0.00870 |
| Pex5l      | 4.85667            | 0.00005 | Nedd4l    | 1.28143            | 0.00010 | Cox8b     | -0.92601           | 0.02410 |
| Ank3       | 4.68146            | 0.00005 | Lpgat1    | 1.27565            | 0.00045 | Hlf       | -0.93522           | 0.02740 |
| Csrp3      | 4.66841            | 0.00005 | Snx7      | 1.27282            | 0.00330 | Macrocl1  | -0.96515           | 0.01230 |
| Atp6v0d2   | 4.35000            | 0.00005 | Mme       | 1.26248            | 0.00025 | Tmem38a   | -0.96668           | 0.04730 |
| Lipf       | 4.21641            | 0.00005 | Palld     | 1.25857            | 0.00050 | Aldh2     | -0.97435           | 0.02150 |
| Lmod2      | 4.12413            | 0.00005 | Lcp2      | 1.25721            | 0.01195 | Drap1     | -0.97465           | 0.00520 |
| Smpx       | 3.99658            | 0.01425 | Tuba1a    | 1.22440            | 0.02680 | Pkhd11l   | -0.98472           | 0.02355 |
| Gpnmb      | 3.88689            | 0.00005 | Slc7a2    | 1.22092            | 0.02570 | Osr1      | -0.99535           | 0.00570 |
| Trdn       | 3.74491            | 0.00005 | Pkia      | 1.21221            | 0.00160 | Wt1       | -0.99601           | 0.03560 |
| Xirp2      | 3.51203            | 0.00005 | Pde4d     | 1.19970            | 0.01405 | Zfp462    | -1.00980           | 0.04080 |
| Ppp1r3a    | 3.48877            | 0.00005 | Paqr9     | 1.19420            | 0.00055 | Dido1     | -1.01945           | 0.00210 |
| Kcnj14     | 3.45995            | 0.00005 | Serpib9   | 1.19301            | 0.00035 | Gdf10     | -1.03041           | 0.00270 |
| Rnf128     | 3.42156            | 0.00005 | Mdfic     | 1.18980            | 0.00020 | Gstt1     | -1.03272           | 0.00240 |
| S100a8     | 3.31546            | 0.00005 | Ret       | 1.18603            | 0.00080 | Ppl       | -1.06460           | 0.00555 |
| Atp1a4     | 3.30654            | 0.00005 | Jph1      | 1.18349            | 0.01045 | Upk1b     | -1.07772           | 0.01690 |
| Sel1l3     | 3.17623            | 0.00095 | Robo1     | 1.18184            | 0.03275 | Vwa1      | -1.08309           | 0.00465 |
| Gtse1      | 3.13560            | 0.00015 | Mef2c     | 1.18090            | 0.00085 | Eln       | -1.09518           | 0.00590 |
| Tfr2       | 3.02731            | 0.00005 | Gbp4      | 1.16784            | 0.03530 | Rhbdd2    | -1.10020           | 0.00740 |
| Shroom2    | 2.98629            | 0.00010 | Cd44      | 1.16653            | 0.00105 | Nbl1      | -1.10227           | 0.00215 |
| Oxtr       | 2.95219            | 0.00005 | Dclk1     | 1.16251            | 0.00435 | Cd209d    | -1.10791           | 0.00665 |
| Mrc2       | 2.91749            | 0.00005 | Uhrf1     | 1.16182            | 0.02875 | Sox7      | -1.13613           | 0.00270 |
| Fam83d     | 2.91268            | 0.00005 | Pfkfb4    | 1.16080            | 0.01045 | Dnah3     | -1.14863           | 0.01960 |
| D3Bwg0562e | 2.89534            | 0.00015 | Col4a5    | 1.15955            | 0.02065 | Ebf2      | -1.15209           | 0.00105 |
| Mstn       | 2.88841            | 0.00855 | Slamf9    | 1.15674            | 0.02125 | Meis1     | -1.15422           | 0.03400 |
| Cadm1      | 2.86181            | 0.00005 | Trp53i11  | 1.15342            | 0.00825 | Podxl     | -1.15656           | 0.00040 |
| Itgax      | 2.81031            | 0.00005 | Nos1      | 1.15019            | 0.01905 | Rnaset2a  | -1.15790           | 0.02180 |
| Mypn       | 2.74714            | 0.00035 | Alcam     | 1.13517            | 0.00935 | Tmem120a  | -1.16825           | 0.00025 |

|               |         |         |           |         |         |         |          |         |
|---------------|---------|---------|-----------|---------|---------|---------|----------|---------|
| Clca1         | 2.72504 | 0.00025 | Nsdhl     | 1.13294 | 0.00060 | Itga3   | -1.16830 | 0.00835 |
| Camk2b        | 2.69670 | 0.00395 | Sash3     | 1.09608 | 0.01425 | Agpat6  | -1.17268 | 0.00045 |
| Sorbs2        | 2.68888 | 0.00005 | Ugt3a2    | 1.09592 | 0.03295 | Mylk4   | -1.17730 | 0.02275 |
| Spc25         | 2.59689 | 0.00005 | Enah      | 1.08911 | 0.02215 | Thbs1   | -1.17841 | 0.00035 |
| Dock8         | 2.56796 | 0.00005 | ApInr     | 1.08383 | 0.01545 | Pdk2    | -1.19746 | 0.00050 |
| Scd2          | 2.55774 | 0.00005 | Phf16     | 1.08037 | 0.00910 | Klhl2   | -1.20213 | 0.00015 |
| Kif2c         | 2.55494 | 0.00015 | Hmgcs1    | 1.05960 | 0.00095 | Chac1   | -1.20232 | 0.00300 |
| Crisp2        | 2.54819 | 0.00215 | Dck       | 1.05270 | 0.02220 | Rnf144b | -1.21100 | 0.00025 |
| Actn2         | 2.49379 | 0.00035 | Mal2      | 1.04782 | 0.03375 | Apln    | -1.23107 | 0.00600 |
| Dclk3         | 2.44742 | 0.00005 | Ephx1     | 1.04186 | 0.00115 | Prodh   | -1.23897 | 0.00785 |
| Txlnb         | 2.40947 | 0.00020 | Adamts5   | 1.03553 | 0.00080 | Col4a6  | -1.24338 | 0.03775 |
| Tnc           | 2.40946 | 0.00005 | Nexn      | 1.03045 | 0.00740 | Vmp1    | -1.25415 | 0.00120 |
| Art1          | 2.40136 | 0.00560 | March7    | 1.02511 | 0.02905 | Slc27a1 | -1.28465 | 0.00015 |
| Specc1        | 2.34646 | 0.00005 | Fam111a   | 1.01240 | 0.01325 | Chdh    | -1.30547 | 0.00025 |
| Sez6l         | 2.28107 | 0.00025 | Maoa      | 1.01194 | 0.00190 | Rasd1   | -1.31284 | 0.00075 |
| Fgf13         | 2.24289 | 0.00005 | Cd52      | 0.99796 | 0.01065 | Lrrn4   | -1.31786 | 0.00815 |
| Tfpi2         | 2.21637 | 0.00005 | Tnfrsf21  | 0.98995 | 0.00810 | Bcat2   | -1.34113 | 0.00060 |
| Saa3          | 2.20788 | 0.00005 | Klhl13    | 0.98525 | 0.01415 | Spock2  | -1.34913 | 0.00245 |
| Marc1         | 2.20116 | 0.00005 | Gadd45a   | 0.97189 | 0.03705 | Sbsn    | -1.36238 | 0.00180 |
| Cela1         | 2.19726 | 0.00005 | Col6a5    | 0.96822 | 0.00955 | Inmt    | -1.38757 | 0.00005 |
| Cpa2          | 2.17804 | 0.00085 | Adssl1    | 0.96434 | 0.02610 | Jph2    | -1.39761 | 0.01070 |
| Klhl41        | 2.17555 | 0.00170 | Dhcr7     | 0.96008 | 0.02080 | Gm10282 | -1.42959 | 0.01845 |
| Fam198b       | 2.16785 | 0.00005 | Zfyve28   | 0.95037 | 0.03570 | Camk2n1 | -1.43181 | 0.00010 |
| Lcp1          | 2.14038 | 0.00005 | Arhgap18  | 0.93595 | 0.00870 | Stk36   | -1.43705 | 0.03560 |
| Ncan          | 2.08159 | 0.00010 | Ptger3    | 0.93463 | 0.00545 | Igf2    | -1.43891 | 0.00160 |
| Cdca7l        | 2.05053 | 0.00455 | Arhgef6   | 0.93204 | 0.04105 | Pkdcc   | -1.44683 | 0.00190 |
| Fap           | 2.04322 | 0.00185 | Trp53inp2 | 0.93025 | 0.00525 | Upk3b   | -1.46349 | 0.00125 |
| Nrap          | 2.03113 | 0.00080 | Rad50     | 0.92495 | 0.00520 | Nmnat3  | -1.46648 | 0.00230 |
| Ccr5          | 2.02545 | 0.00005 | Vgll3     | 0.91562 | 0.00525 | Id1     | -1.47751 | 0.00020 |
| Rab27b        | 2.01671 | 0.00685 | Tjp2      | 0.90237 | 0.00825 | Klhdc8b | -1.49115 | 0.00015 |
| Tpx2          | 2.01157 | 0.00010 | Ptgr1     | 0.89330 | 0.03220 | P2rx1   | -1.50031 | 0.03610 |
| Fbxo40        | 2.00091 | 0.01660 | Fam107b   | 0.89181 | 0.02220 | Asns    | -1.52101 | 0.00005 |
| 3425401B19Rik | 1.99914 | 0.00380 | Slc6a6    | 0.89092 | 0.00330 | Fam188b | -1.53488 | 0.00640 |
| Mki67         | 1.99130 | 0.00005 | Megf9     | 0.89047 | 0.01060 | Rpp25   | -1.55796 | 0.03810 |
| Prkcq         | 1.96979 | 0.00330 | Paqr7     | 0.88348 | 0.02315 | Adam11  | -1.60154 | 0.00965 |
| Lrrn1         | 1.95640 | 0.00655 | Ptprk     | 0.87987 | 0.01110 | Rspo1   | -1.60176 | 0.00155 |
| Trim63        | 1.95132 | 0.00220 | mt-Co2    | 0.87173 | 0.01625 | Shisa4  | -1.60196 | 0.02315 |
| Hdac9         | 1.92729 | 0.00020 | Ass1      | 0.86419 | 0.04525 | Adra1b  | -1.62057 | 0.02815 |
| Mest          | 1.91801 | 0.00005 | Zc2hc1a   | 0.85038 | 0.01295 | Cxadr   | -1.62369 | 0.00350 |
| Emr1          | 1.87972 | 0.00005 | Vldlr     | 0.85027 | 0.02895 | S100a1  | -1.63522 | 0.00005 |
| Npnt          | 1.87204 | 0.04700 | Aldh1a7   | 0.84603 | 0.00545 | Cidea   | -1.63726 | 0.03310 |
| Cdkn1a        | 1.85332 | 0.00005 | Prps1     | 0.84306 | 0.00575 | Sfxn1   | -1.67365 | 0.00005 |
| Gm9696        | 1.83520 | 0.00710 | Igf2bp2   | 0.84296 | 0.04070 | Slc43a1 | -1.69003 | 0.00005 |
| Rcan2         | 1.82602 | 0.00015 | Cyp4v3    | 0.83483 | 0.00695 | Adrb2   | -1.69743 | 0.00005 |

|         |         |         |          |          |         |               |          |         |
|---------|---------|---------|----------|----------|---------|---------------|----------|---------|
| Lamb3   | 1.81432 | 0.00050 | Fabp5    | 0.82004  | 0.01390 | Mmp9          | -1.71208 | 0.00075 |
| Perp    | 1.80554 | 0.00900 | Col6a2   | 0.81127  | 0.01890 | Cabp4         | -1.73408 | 0.03760 |
| Esco2   | 1.80237 | 0.03315 | Sc5d     | 0.81014  | 0.04425 | Wfdc1         | -1.75004 | 0.02880 |
| Cpxm1   | 1.79040 | 0.00205 | Fgl2     | 0.79535  | 0.03850 | Ston2         | -1.77116 | 0.02990 |
| Smarca1 | 1.77500 | 0.01490 | Cpe      | 0.79302  | 0.02145 | Net1          | -1.80107 | 0.00005 |
| Hmmr    | 1.76278 | 0.00970 | Lnx2     | 0.79001  | 0.03580 | Krt18         | -1.80230 | 0.01190 |
| Fmr1    | 1.75909 | 0.00005 | Syp      | 0.78819  | 0.01730 | Krt8          | -1.83272 | 0.01500 |
| Sema4d  | 1.75804 | 0.00010 | Fgf1     | 0.78710  | 0.03480 | Echdc2        | -1.87254 | 0.00035 |
| Eya4    | 1.75753 | 0.00780 | Cxcr4    | 0.78563  | 0.03610 | Gpr64         | -1.91195 | 0.00005 |
| Lep     | 1.74852 | 0.00015 | Anxa1    | 0.76589  | 0.01920 | Il17rb        | -1.91930 | 0.00365 |
| Gm7694  | 1.74330 | 0.00115 | Sfrp5    | 0.76136  | 0.02000 | Acot4         | -1.94048 | 0.00030 |
| Clec4b1 | 1.73910 | 0.00835 | Sema3c   | 0.75174  | 0.02160 | Slc38a4       | -1.95233 | 0.00500 |
| Ckmt2   | 1.72956 | 0.00505 | Gbp2     | 0.74405  | 0.01755 | Slc1a3        | -1.95645 | 0.00005 |
| Pm20d1  | 1.72341 | 0.03055 | Lhfp12   | 0.73884  | 0.01570 | Stxb1         | -1.96105 | 0.00315 |
| Fbp2    | 1.70058 | 0.01565 | Vac14    | 0.72523  | 0.03635 | Acsm5         | -1.98582 | 0.00005 |
| Scd4    | 1.70039 | 0.00970 | B4galt6  | 0.72513  | 0.03995 | Acacb         | -2.02496 | 0.00005 |
| Pam     | 1.69988 | 0.00440 | S100a4   | 0.71243  | 0.04905 | Agt           | -2.06853 | 0.00005 |
| Pak3    | 1.66227 | 0.00370 | Nkd1     | 0.70875  | 0.04520 | Ucp1          | -2.10832 | 0.00005 |
| Peg10   | 1.65643 | 0.00020 | Col6a1   | 0.70852  | 0.03545 | Usp35         | -2.12827 | 0.00260 |
| Cenpe   | 1.64860 | 0.00295 | Rnf11    | 0.69599  | 0.03875 | Adcyap1r1     | -2.13199 | 0.00005 |
| Insig1  | 1.62385 | 0.00005 | Fam114a1 | 0.68821  | 0.03685 | Wnt2b         | -2.13759 | 0.00880 |
| Tmem252 | 1.62067 | 0.00215 | Hn1l     | 0.68014  | 0.03670 | Rorc          | -2.14456 | 0.00905 |
| Lctl    | 1.60067 | 0.00005 | Mylip    | 0.67530  | 0.04510 | Gpx3          | -2.16907 | 0.00005 |
| Myom2   | 1.58631 | 0.00905 | Dse      | 0.66001  | 0.04860 | Ces1f         | -2.21142 | 0.00005 |
| Mfge8   | 1.55518 | 0.00005 | Dap      | 0.63087  | 0.03800 | Slc2a3        | -2.21400 | 0.00005 |
| Ckap2   | 1.54965 | 0.02595 | Cryab    | 0.62920  | 0.04420 | Fam13a        | -2.21699 | 0.00005 |
| Folh1   | 1.54280 | 0.00040 | Pea15a   | 0.61954  | 0.04540 | Tmem88b       | -2.25176 | 0.00005 |
| Prune2  | 1.54052 | 0.00100 | Cdr2     | 0.60890  | 0.04805 | Kank4         | -2.26148 | 0.00190 |
| Mreg    | 1.53819 | 0.02775 | Fbn1     | -0.60186 | 0.04625 | 2810459M11Rik | -2.26481 | 0.00195 |
| Sept9   | 1.53481 | 0.01790 | Tusc5    | -0.65934 | 0.03785 | Cyp2e1        | -2.27334 | 0.00005 |
| Iigp1   | 1.53342 | 0.00075 | Arxes2   | -0.66741 | 0.02865 | 1700024P16Rik | -2.30334 | 0.00130 |
| Xkr4    | 1.52368 | 0.02490 | Myh4     | -0.68123 | 0.04120 | Tst           | -2.31019 | 0.00005 |
| March1  | 1.52248 | 0.00090 | St3gal1  | -0.68424 | 0.04385 | Olfr1034      | -2.33845 | 0.00520 |
| Gbp6    | 1.50176 | 0.00055 | Pgm2     | -0.69122 | 0.03125 | Mycl          | -2.35761 | 0.00005 |
| Setbp1  | 1.49889 | 0.00230 | Myl1     | -0.69759 | 0.03385 | Zyg11a        | -2.38170 | 0.00620 |
| Col12a1 | 1.48871 | 0.02055 | Lpin1    | -0.72180 | 0.02845 | Col20a1       | -2.40014 | 0.03760 |
| Lum     | 1.48130 | 0.00005 | Slc6a13  | -0.74487 | 0.02730 | Mrgprg        | -2.52505 | 0.00970 |
| Scd3    | 1.46293 | 0.00840 | Chchd10  | -0.75054 | 0.04705 | Cyp1a1        | -2.61707 | 0.00035 |
| Angpt1  | 1.44537 | 0.00530 | Klhl21   | -0.76645 | 0.03500 | Irf4          | -2.67947 | 0.00005 |
| Esrrg   | 1.43926 | 0.04745 | G0s2     | -0.76734 | 0.02240 | Olfr1033      | -2.80674 | 0.00005 |
| Kcnt2   | 1.43054 | 0.03365 | Tinagl1  | -0.77846 | 0.02735 | Dok7          | -2.88559 | 0.00080 |
| St8sia4 | 1.42920 | 0.00050 | Abi3bp   | -0.77998 | 0.02805 | Gm454         | -2.94042 | 0.00005 |
| Kif11   | 1.42196 | 0.01435 | Dennd2a  | -0.78920 | 0.02760 | Slc27a2       | -2.96566 | 0.00030 |
| Adamts1 | 1.42150 | 0.02720 | Ppp1r12b | -0.79092 | 0.02220 | Drd1a         | -3.05742 | 0.00385 |

|        |         |         |         |          |         |         |          |         |
|--------|---------|---------|---------|----------|---------|---------|----------|---------|
| Pi15   | 1.42005 | 0.02110 | Sult1e1 | -0.80239 | 0.03465 | Fn3k    | -3.18904 | 0.00090 |
| Igfals | 1.41987 | 0.00005 | Irs2    | -0.80406 | 0.04925 | Grem2   | -3.37006 | 0.00005 |
| Ccser2 | 1.41029 | 0.03095 | Trip10  | -0.81135 | 0.01535 | Acsm3   | -4.11177 | 0.00355 |
| Cfh    | 1.40343 | 0.00025 | Zbtb16  | -0.81608 | 0.01430 | Cyp2f2  | -4.38540 | 0.00005 |
| Gbp5   | 1.40319 | 0.00670 | Mxipl   | -0.82073 | 0.04310 | Cyp3a11 | -6.20470 | 0.02155 |
| Fam49a | 1.39420 | 0.00005 | Apold1  | -0.85794 | 0.04200 | Fabp1   | -6.33308 | 0.02265 |
| Lbp    | 1.36790 | 0.00020 | Gpd2    | -0.85846 | 0.02940 |         |          |         |

## 823 genes were selectively dysregulated in the eWAT of NAFL mice.

| Gene name     | log2 (fold change) | P value | Gene name | log2 (fold change) | P value | Gene name     | log2 (fold change) | P value |
|---------------|--------------------|---------|-----------|--------------------|---------|---------------|--------------------|---------|
| mt-Atp8       | 17.27980           | 0.03815 | Ube2w     | 0.62125            | 0.00455 | Mup14         | -1.56376           | 0.03715 |
| Pkp1          | 4.21818            | 0.00155 | Gltp      | 0.61845            | 0.00215 | Gadd45g       | -1.58617           | 0.00005 |
| Grid1         | 4.04006            | 0.02690 | Hsp90aa1  | 0.61755            | 0.03165 | Clic6         | -1.59124           | 0.00175 |
| Heph1         | 3.45101            | 0.01285 | Gm16515   | 0.61243            | 0.01720 | Gm9396        | -1.59424           | 0.04305 |
| Ear11         | 3.44296            | 0.00005 | Slc48a1   | 0.61094            | 0.00625 | Atp1b2        | -1.60549           | 0.00005 |
| Bpifb6        | 3.20620            | 0.01030 | Tpm4      | 0.61042            | 0.01215 | Lcn2          | -1.60705           | 0.00005 |
| Mogat2        | 3.01991            | 0.00025 | Plxna1    | 0.60958            | 0.00700 | Nt5e          | -1.61198           | 0.00005 |
| Serpina3a     | 2.67352            | 0.02240 | Hsd17b12  | 0.60537            | 0.00640 | Schip1        | -1.61334           | 0.00015 |
| Pla2g2e       | 2.33914            | 0.00010 | Kcnj15    | 0.60473            | 0.00715 | 4921507P07Rik | -1.61392           | 0.02375 |
| Klf14         | 2.32302            | 0.00025 | Hebp1     | 0.59996            | 0.00380 | Col8a2        | -1.61712           | 0.01615 |
| Ache          | 2.31590            | 0.02105 | Kcnj8     | 0.59974            | 0.02520 | Serpina3k     | -1.63113           | 0.00025 |
| Rpl9-ps6      | 2.27863            | 0.00005 | Col5a2    | 0.59923            | 0.00330 | Prrt1         | -1.63887           | 0.01200 |
| Il13ra2       | 2.27188            | 0.02440 | Pkp2      | 0.59857            | 0.00380 | Cox7a1        | -1.64862           | 0.00140 |
| Chga          | 2.24295            | 0.04960 | Kpna2     | 0.59635            | 0.00820 | Syngn1        | -1.65805           | 0.03170 |
| Golga7b       | 2.20440            | 0.00140 | Sucnr1    | 0.59619            | 0.00555 | Bhmt          | -1.66951           | 0.00190 |
| Fbxo48        | 2.19334            | 0.03885 | Tuba1b    | 0.59538            | 0.01530 | Got1          | -1.66978           | 0.00010 |
| Srp54b        | 2.17203            | 0.00510 | Palmd     | 0.59334            | 0.01325 | 2810408A11Rik | -1.67067           | 0.03385 |
| Fam20c        | 2.15858            | 0.00005 | Tubg1     | 0.59314            | 0.04650 | Egf           | -1.67138           | 0.01310 |
| Ttc30a2       | 2.06497            | 0.02220 | Casp12    | 0.59307            | 0.01230 | 4930571K23Rik | -1.67214           | 0.00895 |
| Map1a         | 1.98046            | 0.02270 | Parp3     | 0.59092            | 0.01875 | Shisa9        | -1.67254           | 0.00255 |
| Tnfrsf17      | 1.97161            | 0.04020 | Nln       | 0.59027            | 0.00570 | Cfi           | -1.67267           | 0.04005 |
| Ptchd4        | 1.96345            | 0.00010 | Dock5     | 0.59021            | 0.02395 | Cetn1         | -1.67419           | 0.03685 |
| Cxx1b         | 1.90531            | 0.00005 | Gtf2h5    | 0.58852            | 0.01070 | Elmod1        | -1.67569           | 0.00370 |
| Krt79         | 1.89141            | 0.01080 | Kirrel    | 0.58802            | 0.00410 | Smox          | -1.67711           | 0.00005 |
| Cadps         | 1.86438            | 0.00135 | Edem1     | 0.58742            | 0.00565 | Amd1          | -1.68466           | 0.00005 |
| Glrb          | 1.78911            | 0.02175 | Tfg       | 0.58523            | 0.00715 | Cacna2d1      | -1.69043           | 0.00005 |
| Mageb18       | 1.75711            | 0.00630 | Cblb      | -0.58681           | 0.00620 | 2610318N02Rik | -1.69166           | 0.03615 |
| Odf3l1        | 1.73902            | 0.00185 | Gata6     | -0.58814           | 0.03550 | Usp2          | -1.70248           | 0.00090 |
| Gabbr2        | 1.73678            | 0.00065 | Fads1     | -0.59058           | 0.00560 | Mup7          | -1.70606           | 0.00295 |
| 4933427G17Rik | 1.71900            | 0.03745 | Cd14      | -0.59364           | 0.04180 | Cacna1h       | -1.71510           | 0.02605 |
| Fam83a        | 1.71844            | 0.00090 | Kctd6     | -0.59816           | 0.01705 | Pde4dip       | -1.74716           | 0.00005 |
| Siglecg       | 1.70306            | 0.02170 | Dusp18    | -0.59834           | 0.03675 | Ttll7         | -1.75392           | 0.00005 |
| Srpx2         | 1.66214            | 0.00005 | Arhgap42  | -0.60109           | 0.00965 | Maats1        | -1.76867           | 0.03705 |

|               |         |         |           |          |         |                   |          |         |
|---------------|---------|---------|-----------|----------|---------|-------------------|----------|---------|
| Lag3          | 1.65121 | 0.00450 | Limk2     | -0.60266 | 0.03540 | Rsph1             | -1.76873 | 0.00895 |
| Nek6          | 1.64430 | 0.00015 | Pabpn1    | -0.60894 | 0.04625 | Gfra1             | -1.77074 | 0.00720 |
| Pcolce2       | 1.62592 | 0.00005 | Crebzf    | -0.60968 | 0.03175 | 1700019M22Ri<br>k | -1.78094 | 0.02460 |
| Ephb2         | 1.58283 | 0.00090 | Man2a1    | -0.61258 | 0.00490 | C7                | -1.79632 | 0.00005 |
| Ppp1r3d       | 1.57252 | 0.00010 | Btg1      | -0.61845 | 0.00395 | Hook1             | -1.80638 | 0.00215 |
| Unc119        | 1.56277 | 0.00005 | Map3k7cl  | -0.62116 | 0.03675 | Cldn10            | -1.81469 | 0.01225 |
| Dgat2         | 1.55865 | 0.00010 | Rif1      | -0.62665 | 0.01340 | Dcdc2a            | -1.82135 | 0.04865 |
| Dnajb13       | 1.53282 | 0.01235 | Dnal1     | -0.62861 | 0.03680 | Cdhr4             | -1.83159 | 0.02590 |
| Acss2         | 1.52230 | 0.00005 | Fmo2      | -0.63143 | 0.00545 | Rnf157            | -1.83586 | 0.04900 |
| Hist1h1e      | 1.50844 | 0.02450 | Bmp4      | -0.63281 | 0.04500 | Pde11a            | -1.84107 | 0.01005 |
| Unc79         | 1.50508 | 0.02995 | Jhdm1d    | -0.63772 | 0.00255 | Cxcl13            | -1.84663 | 0.00055 |
| Bmp3          | 1.49814 | 0.00005 | Ccnj      | -0.64076 | 0.03615 | Rgs2              | -1.85783 | 0.00005 |
| Cox4i2        | 1.47050 | 0.00880 | Tead1     | -0.64950 | 0.00540 | Kif2b             | -1.86048 | 0.01720 |
| Esm1          | 1.45693 | 0.03190 | Penk      | -0.65100 | 0.00280 | Ankrd9            | -1.88256 | 0.00535 |
| Lypd6b        | 1.45363 | 0.04350 | Vdac3-ps1 | -0.65262 | 0.02560 | Spata18           | -1.89377 | 0.00810 |
| Wscd2         | 1.45253 | 0.01085 | Slc16a7   | -0.65300 | 0.00525 | Fam71d            | -1.89791 | 0.03960 |
| Sgol2         | 1.44134 | 0.03255 | Grhl1     | -0.65444 | 0.03380 | Bmpr1b            | -1.90994 | 0.00035 |
| Lonrf2        | 1.42200 | 0.02725 | Synpo     | -0.66017 | 0.02730 | Fbxo32            | -1.91538 | 0.00005 |
| Tmem45b       | 1.41516 | 0.00005 | Mpi       | -0.66424 | 0.03225 | Tnnt1             | -1.93171 | 0.00525 |
| Aldh3b2       | 1.41244 | 0.00005 | Ahr       | -0.66587 | 0.02465 | Scnn1a            | -1.93907 | 0.00580 |
| Cd209e        | 1.40060 | 0.03760 | Ugp2      | -0.66789 | 0.00645 | Pdlim3            | -1.96397 | 0.00005 |
| Snx20         | 1.39844 | 0.03215 | Otud1     | -0.67280 | 0.02615 | Rab15             | -1.97849 | 0.01305 |
| C130026I21Rik | 1.38463 | 0.02555 | Slc16a2   | -0.67482 | 0.03425 | Cdh19             | -1.98310 | 0.00435 |
| Mmp3          | 1.37113 | 0.03740 | Hmgb1     | -0.67576 | 0.01250 | Cabs1             | -1.98378 | 0.01905 |
| Tstd3         | 1.36970 | 0.03240 | Fzd7      | -0.67629 | 0.01795 | Atp1b1            | -1.99395 | 0.00005 |
| Prdm8         | 1.36769 | 0.03525 | Srrm2     | -0.67769 | 0.00455 | Igic2             | -1.99502 | 0.00005 |
| Olfm1         | 1.36735 | 0.00005 | Ogfrl1    | -0.67957 | 0.00810 | 4933411K16Rik     | -2.00599 | 0.04355 |
| Grtp1         | 1.36694 | 0.00325 | Dnajb5    | -0.67959 | 0.02090 | Enkur             | -2.01462 | 0.00465 |
| Orm1          | 1.34706 | 0.00540 | lvns1abp  | -0.67975 | 0.02120 | Plp1              | -2.03639 | 0.00030 |
| Ptx3          | 1.34512 | 0.03215 | Nxn       | -0.67997 | 0.04230 | Eif4ebp3          | -2.04600 | 0.01490 |
| Cxcl1         | 1.32705 | 0.04910 | Odf2      | -0.68103 | 0.03715 | Calml3            | -2.04841 | 0.01470 |
| Bcar3         | 1.30583 | 0.00005 | Slc46a3   | -0.68279 | 0.04740 | Nr4a1             | -2.05755 | 0.00035 |
| Rasgrp1       | 1.26310 | 0.02090 | Bin1      | -0.68748 | 0.00535 | Smcp              | -2.06187 | 0.00015 |
| Nuf2          | 1.26098 | 0.02490 | Golga4    | -0.69246 | 0.00155 | Gm10032           | -2.06268 | 0.02230 |
| Hfe           | 1.23768 | 0.00005 | Tarsl2    | -0.69467 | 0.03295 | Wwc1              | -2.07576 | 0.01915 |
| Trim14        | 1.23314 | 0.02375 | Adamts15  | -0.69957 | 0.01045 | Fhl4              | -2.08851 | 0.00090 |
| Hist1h2bc     | 1.23107 | 0.00005 | Pck2      | -0.70208 | 0.00795 | Prss39            | -2.09714 | 0.04375 |
| Col6a3        | 1.22834 | 0.01000 | L2hgdh    | -0.70544 | 0.00625 | Hoxa9             | -2.09773 | 0.03210 |
| Slc2a10       | 1.19674 | 0.01715 | Ccp110    | -0.70595 | 0.02025 | Spem1             | -2.10041 | 0.02610 |
| Tlcd2         | 1.19630 | 0.02620 | St3gal5   | -0.70751 | 0.01790 | Mapt              | -2.10052 | 0.00010 |
| Sgms2         | 1.19363 | 0.00080 | Sgpl1     | -0.70872 | 0.00095 | Serpina1e         | -2.10215 | 0.00110 |
| Tspan17       | 1.18933 | 0.00005 | Hif1an    | -0.71555 | 0.00365 | Pmfbbp1           | -2.11859 | 0.01380 |
| Atp10a        | 1.18772 | 0.00010 | C6        | -0.71675 | 0.00195 | Rwdd3             | -2.13190 | 0.00160 |

|               |         |         |               |          |         |               |          |         |
|---------------|---------|---------|---------------|----------|---------|---------------|----------|---------|
| Rasl12        | 1.17460 | 0.00045 | Maob          | -0.71908 | 0.00060 | Ttl13         | -2.13385 | 0.02830 |
| Ppfia3        | 1.16726 | 0.04525 | Pde1a         | -0.71933 | 0.01090 | Hnf4a         | -2.16642 | 0.00610 |
| Crtac1        | 1.15964 | 0.00005 | Lrig3         | -0.72325 | 0.02100 | Plekhb1       | -2.16684 | 0.00005 |
| Fdps          | 1.15955 | 0.00050 | Upf3b         | -0.72526 | 0.00360 | 4922502D21Rik | -2.17341 | 0.00130 |
| Tspan6        | 1.15345 | 0.00285 | Scn1b         | -0.72603 | 0.00875 | 2010300C02Rik | -2.17450 | 0.01860 |
| Diras2        | 1.15056 | 0.04085 | Tfb2m         | -0.72709 | 0.04315 | 1700003E16Rik | -2.17710 | 0.03790 |
| Sdsl          | 1.14697 | 0.03675 | Fam214a       | -0.72992 | 0.01930 | Txndc2        | -2.18897 | 0.00120 |
| Anxa2         | 1.14668 | 0.00075 | 2410002F23Rik | -0.73097 | 0.01190 | Phka1         | -2.19768 | 0.00005 |
| Dtl           | 1.14288 | 0.04485 | Zkscan3       | -0.73321 | 0.00285 | Finc          | -2.20079 | 0.00005 |
| Rab11fip4     | 1.14007 | 0.04130 | Kcnc3         | -0.73948 | 0.01315 | Sult1d1       | -2.20852 | 0.03140 |
| Mgl2          | 1.13143 | 0.00005 | Nampt         | -0.74048 | 0.00220 | Prm2          | -2.21008 | 0.00005 |
| Pcbd1         | 1.10810 | 0.00110 | Nr2f2         | -0.74104 | 0.00165 | Tdo2          | -2.21198 | 0.00170 |
| Dmtn          | 1.10361 | 0.00005 | Prkab2        | -0.74128 | 0.00185 | Ccdc19        | -2.21897 | 0.04425 |
| Hist1h2be     | 1.09659 | 0.00020 | Plec          | -0.74212 | 0.00780 | Alox15        | -2.22036 | 0.00265 |
| Cdsn          | 1.09309 | 0.00005 | Acvr1c        | -0.74334 | 0.00180 | Epcam         | -2.22086 | 0.01045 |
| Myl4          | 1.09087 | 0.01105 | Satb1         | -0.74417 | 0.01950 | Odf1          | -2.22588 | 0.00085 |
| Sfrp4         | 1.08963 | 0.00240 | Slc25a4       | -0.74469 | 0.00470 | Tuba4a        | -2.22625 | 0.00430 |
| Sgsh          | 1.08917 | 0.00360 | Ednra         | -0.74500 | 0.00585 | Tsnaxip1      | -2.24415 | 0.04720 |
| Unc5a         | 1.08541 | 0.04065 | Mertk         | -0.74796 | 0.00080 | Pipox         | -2.24788 | 0.03175 |
| Itpk1         | 1.07494 | 0.01835 | Ppp1cc        | -0.75021 | 0.01545 | Ppm1l         | -2.25165 | 0.00025 |
| Npr3          | 1.07463 | 0.00495 | Got2          | -0.75124 | 0.00150 | Cdh16         | -2.26434 | 0.00625 |
| Cfb           | 1.06889 | 0.01310 | Foxc1         | -0.75134 | 0.02425 | Rassf6        | -2.27901 | 0.00765 |
| Tnfrsf10b     | 1.06596 | 0.00665 | Srcap         | -0.75770 | 0.03730 | 4930544G11Rik | -2.27953 | 0.04915 |
| Atp2a3        | 1.05884 | 0.00005 | Pnpla7        | -0.76482 | 0.04920 | Nr4a3         | -2.28110 | 0.00005 |
| Col5a1        | 1.05577 | 0.00005 | Tob2          | -0.77003 | 0.00040 | Me3           | -2.28790 | 0.00610 |
| Mmd           | 1.05362 | 0.01460 | Tfpi          | -0.77014 | 0.00480 | Spata19       | -2.28834 | 0.00525 |
| Ccdc64        | 1.03945 | 0.04620 | Rfx3          | -0.77104 | 0.01925 | Acl6          | -2.28893 | 0.00605 |
| Htra3         | 1.03771 | 0.00005 | Ano1          | -0.77434 | 0.00575 | H1fnt         | -2.30162 | 0.00580 |
| Klb           | 1.03721 | 0.00005 | Fkbp5         | -0.77662 | 0.00415 | Dio2          | -2.30658 | 0.00090 |
| Dusp10        | 1.03298 | 0.00215 | Fem1a         | -0.78004 | 0.00205 | 1700015G11Rik | -2.31728 | 0.04335 |
| Lss           | 1.02341 | 0.00825 | Slc12a2       | -0.78040 | 0.00045 | Col6a4        | -2.33009 | 0.04155 |
| 9030617O03Rik | 1.02276 | 0.00870 | Cdc14a        | -0.78279 | 0.01815 | Prdx6b        | -2.33628 | 0.03290 |
| Tuba1c        | 1.01984 | 0.00010 | Pank1         | -0.78926 | 0.03780 | Synm          | -2.34527 | 0.00005 |
| Clmp          | 1.01546 | 0.00005 | Foxred2       | -0.78928 | 0.02260 | Clip4         | -2.35001 | 0.00015 |
| Kcnc2         | 1.01405 | 0.01590 | Cdkn1c        | -0.79561 | 0.00140 | 4933402P03Rik | -2.36677 | 0.04155 |
| Itga7         | 1.01320 | 0.00005 | Scara5        | -0.80681 | 0.00045 | Tmem52        | -2.36776 | 0.00440 |
| Serpinh1      | 1.01122 | 0.00005 | Zfp39         | -0.81596 | 0.01990 | Cacnb1        | -2.37005 | 0.03575 |
| I830012O16Rik | 1.01060 | 0.00925 | Il6ra         | -0.81616 | 0.00100 | Tmod1         | -2.37155 | 0.01970 |
| Igsf10        | 1.00791 | 0.02855 | Cep85l        | -0.81864 | 0.02195 | Padi2         | -2.37336 | 0.00010 |
| Col5a3        | 1.00703 | 0.00005 | Myo1b         | -0.82725 | 0.01160 | Gprasp2       | -2.37622 | 0.00005 |
| Gpc1          | 1.00694 | 0.00005 | 1700029J07Rik | -0.83465 | 0.03070 | Ak7           | -2.39182 | 0.00780 |
| Zbed4         | 1.00302 | 0.01480 | Cnr1          | -0.83728 | 0.00520 | Angpt4        | -2.39399 | 0.00280 |
| Elmo3         | 1.00285 | 0.00585 | Efcab2        | -0.84167 | 0.04415 | Prm1          | -2.40086 | 0.00335 |
| Hspb7         | 1.00172 | 0.00005 | Arhgap28      | -0.84642 | 0.03865 | Foxj1         | -2.40489 | 0.02685 |

|               |         |         |               |          |         |               |          |         |
|---------------|---------|---------|---------------|----------|---------|---------------|----------|---------|
| Rbm28         | 0.99899 | 0.01355 | Trp53inp1     | -0.84976 | 0.00005 | Rarres1       | -2.40794 | 0.00070 |
| Col18a1       | 0.99861 | 0.00045 | 4931406P16Rik | -0.85017 | 0.00380 | Csnka2ip      | -2.41848 | 0.04560 |
| Thnsl1        | 0.99783 | 0.04530 | Pfn2          | -0.85102 | 0.00200 | Ctnna3        | -2.42390 | 0.01765 |
| Map6          | 0.99742 | 0.00160 | Cyp2d22       | -0.85144 | 0.00015 | Ddx25         | -2.42980 | 0.03660 |
| Rab9b         | 0.98310 | 0.00785 | Adamts12      | -0.85456 | 0.00035 | Hspa1l        | -2.44386 | 0.01325 |
| Myom3         | 0.97061 | 0.03065 | Ildr2         | -0.85555 | 0.00235 | Acsbg1        | -2.44641 | 0.00005 |
| C130074G19Rik | 0.96946 | 0.00005 | Polr3gl       | -0.85796 | 0.00155 | Lrrc46        | -2.44919 | 0.00810 |
| Abcg1         | 0.96647 | 0.00005 | Hif3a         | -0.86215 | 0.00840 | Cypt12        | -2.46728 | 0.00385 |
| Slc35g1       | 0.96406 | 0.00455 | Gm6768        | -0.86263 | 0.00195 | 2010015L04Rik | -2.46779 | 0.01255 |
| Agpat2        | 0.96140 | 0.00140 | Spon1         | -0.86606 | 0.00085 | Des           | -2.48235 | 0.00005 |
| Col15a1       | 0.95637 | 0.00095 | Gata2         | -0.86681 | 0.01455 | 4933415F23Rik | -2.48244 | 0.04250 |
| Prkcdbp       | 0.95067 | 0.00005 | Gapdh         | -0.87813 | 0.00035 | Smtnl2        | -2.50285 | 0.00005 |
| Degs1         | 0.95022 | 0.00005 | Amigo2        | -0.88013 | 0.00475 | Lsmem1        | -2.52139 | 0.01305 |
| Rarres2       | 0.94872 | 0.00005 | Gpm6a         | -0.89484 | 0.00245 | 1700016K19Rik | -2.53885 | 0.04275 |
| Itgb5         | 0.94616 | 0.00325 | Ddo           | -0.89924 | 0.02805 | 4933402J07Rik | -2.55000 | 0.03065 |
| Rab71         | 0.94498 | 0.00130 | Gpcpd1        | -0.90577 | 0.00060 | Epb4.1l4b     | -2.55268 | 0.00215 |
| Me1           | 0.93988 | 0.00070 | Arrdc2        | -0.90793 | 0.00180 | Slc30a2       | -2.58470 | 0.00105 |
| Cmc2          | 0.93929 | 0.02665 | Gpr126        | -0.90804 | 0.02250 | Slc16a3       | -2.58510 | 0.00010 |
| Fam110c       | 0.93743 | 0.00145 | Aox3          | -0.91301 | 0.01910 | Tpm2          | -2.64295 | 0.00005 |
| Sod3          | 0.93368 | 0.00005 | Bcl2l1        | -0.92228 | 0.00230 | Pah           | -2.64372 | 0.00385 |
| Hspa12a       | 0.93358 | 0.00005 | Slc4a4        | -0.92351 | 0.00010 | Akap6         | -2.64633 | 0.00050 |
| Rap1gap2      | 0.92954 | 0.00055 | 1700025G04Rik | -0.92776 | 0.03725 | Akap3         | -2.66827 | 0.02860 |
| Comt          | 0.92833 | 0.00140 | 4833403I15Rik | -0.93077 | 0.03870 | Mup11         | -2.68437 | 0.01215 |
| Sdk1          | 0.92438 | 0.02805 | Coro6         | -0.93175 | 0.00570 | 1700013G24Rik | -2.69973 | 0.03430 |
| Tiam1         | 0.92148 | 0.00315 | Vnn1          | -0.93218 | 0.00310 | 1500015O10Rik | -2.74242 | 0.00315 |
| Tubb2a        | 0.92077 | 0.00055 | Sfrp2         | -0.93414 | 0.00255 | Cldn11        | -2.74577 | 0.00005 |
| Mmp15         | 0.92047 | 0.03975 | Tgfb2         | -0.93479 | 0.00425 | Ccdc113       | -2.75207 | 0.03175 |
| Adam12        | 0.91696 | 0.00005 | 2700097O09Rik | -0.93632 | 0.03160 | Ptgds         | -2.75521 | 0.00075 |
| Abat          | 0.91603 | 0.00005 | Cyp1b1        | -0.94063 | 0.00005 | Hpca          | -2.78669 | 0.00010 |
| Itga6         | 0.91529 | 0.00030 | Amica1        | -0.95565 | 0.04115 | A330021E22Rik | -2.79066 | 0.00005 |
| Vstm4         | 0.91123 | 0.00550 | Rps6ka2       | -0.96047 | 0.01085 | Mael          | -2.79156 | 0.02060 |
| Cdkn2b        | 0.90935 | 0.02890 | Amot          | -0.96286 | 0.00130 | Fam134b       | -2.86928 | 0.00005 |
| Pgd           | 0.90535 | 0.00010 | Lmod1         | -0.96743 | 0.00245 | Mlf1          | -2.88755 | 0.00005 |
| N6amt2        | 0.89929 | 0.01390 | Prom1         | -0.96768 | 0.00930 | Trim72        | -2.92537 | 0.00210 |
| Mgmt          | 0.89912 | 0.03830 | Cd46          | -0.96860 | 0.04075 | Cmtm2b        | -2.92955 | 0.02040 |
| Dhx32         | 0.89686 | 0.03535 | Fam107a       | -0.97736 | 0.00005 | Abcb4         | -2.93751 | 0.00005 |
| S100a11       | 0.89588 | 0.00015 | Dixdc1        | -0.97968 | 0.00890 | Wnk2          | -2.96021 | 0.00145 |
| Akap17b       | 0.89002 | 0.01625 | Myl9          | -0.97973 | 0.00015 | Ccdc153       | -2.99860 | 0.01605 |
| Ppic          | 0.88916 | 0.00005 | St3gal6       | -0.98214 | 0.02210 | Mt3           | -2.99895 | 0.04815 |
| Tspan18       | 0.88390 | 0.01235 | Prlr          | -0.98289 | 0.00915 | Cobl          | -3.02652 | 0.02205 |
| Cd59a         | 0.88136 | 0.00005 | Cbx7          | -0.98782 | 0.03095 | Syce1         | -3.05334 | 0.02340 |
| Cd209a        | 0.87873 | 0.00880 | Gstm5         | -0.98829 | 0.00020 | Tmco2         | -3.09621 | 0.01445 |
| Cystm1        | 0.87682 | 0.00100 | Dnajc27       | -0.99040 | 0.00465 | Tmem56        | -3.10415 | 0.00005 |
| Prelp         | 0.87580 | 0.00455 | Rbp1          | -0.99596 | 0.02020 | Pfkm          | -3.15028 | 0.00005 |

|          |         |         |         |          |         |                   |          |         |
|----------|---------|---------|---------|----------|---------|-------------------|----------|---------|
| Rtn4r1   | 0.87510 | 0.00055 | Isyna1  | -0.99667 | 0.01745 | Serpina3j         | -3.15609 | 0.01735 |
| Gale     | 0.86941 | 0.03745 | Slc35e4 | -0.99706 | 0.01740 | Alpk3             | -3.16024 | 0.00005 |
| Slc25a19 | 0.86803 | 0.03945 | Lamc2   | -1.00399 | 0.04535 | Tcea3             | -3.16408 | 0.00005 |
| Akap2    | 0.86485 | 0.00015 | Shisa2  | -1.01568 | 0.00615 | Murc              | -3.17734 | 0.00005 |
| Dagla    | 0.86260 | 0.03795 | Dzip1l  | -1.02187 | 0.03805 | Dusp13            | -3.19232 | 0.00155 |
| Irs3     | 0.86227 | 0.00310 | Epha4   | -1.03010 | 0.02585 | Tnp2              | -3.19509 | 0.00005 |
| Fscn1    | 0.85425 | 0.03450 | Nr6a1   | -1.03214 | 0.03880 | 4930503B20Rik     | -3.20345 | 0.00655 |
| Ubttd1   | 0.85236 | 0.01530 | Ppp2r3a | -1.03623 | 0.00005 | Mlip              | -3.20398 | 0.00005 |
| Syt12    | 0.84970 | 0.03295 | Usp54   | -1.04397 | 0.04500 | 1700092M07Ri<br>k | -3.20773 | 0.03935 |
| G6pdx    | 0.84921 | 0.00070 | Map1b   | -1.04569 | 0.00005 | Cdh1              | -3.22210 | 0.04820 |
| Sept4    | 0.84829 | 0.00410 | Sox9    | -1.04915 | 0.03800 | Bdh1              | -3.22501 | 0.00030 |
| Phf8     | 0.84755 | 0.00010 | Spata24 | -1.05206 | 0.01845 | Srl               | -3.24015 | 0.00005 |
| Ear2     | 0.84409 | 0.00070 | Myh11   | -1.05400 | 0.00005 | 4921530L21Rik     | -3.26641 | 0.03690 |
| Rab38    | 0.84369 | 0.03240 | Arrdc3  | -1.06352 | 0.00005 | Gm15440           | -3.29804 | 0.03285 |
| Sqle     | 0.84341 | 0.02215 | Ttyh1   | -1.06535 | 0.03350 | Ddit4l            | -3.31125 | 0.00035 |
| Trabd2b  | 0.83847 | 0.00030 | Itgb4   | -1.06801 | 0.03120 | Gdap1             | -3.31207 | 0.00105 |
| Large    | 0.82955 | 0.00055 | Lrrc20  | -1.06801 | 0.00810 | Mup17             | -3.34883 | 0.00070 |
| Pcyox1   | 0.81520 | 0.00085 | Slpi    | -1.07922 | 0.01995 | Ldb3              | -3.38083 | 0.00005 |
| C1qtnf1  | 0.81371 | 0.00030 | Gpr157  | -1.08143 | 0.00130 | Tssk2             | -3.40126 | 0.01905 |
| Gcsh     | 0.81097 | 0.00015 | Eps8l2  | -1.08144 | 0.03295 | Klh33             | -3.40926 | 0.03055 |
| Acaa1b   | 0.80918 | 0.00585 | Il33    | -1.08532 | 0.00025 | Stac3             | -3.45819 | 0.00140 |
| Atp9a    | 0.80706 | 0.00005 | Nt5dc3  | -1.08616 | 0.00090 | Asb2              | -3.47445 | 0.00015 |
| Pmepa1   | 0.79984 | 0.00030 | Ropn1l  | -1.08808 | 0.02060 | Tspan8            | -3.47451 | 0.00035 |
| Pafah2   | 0.79722 | 0.00595 | Colec11 | -1.09243 | 0.04350 | Asb10             | -3.54496 | 0.00020 |
| Lgals1   | 0.79393 | 0.01380 | Efhc1   | -1.10503 | 0.02440 | Erich2            | -3.58295 | 0.00350 |
| Dhcr24   | 0.78978 | 0.00790 | Prkaa2  | -1.10740 | 0.00005 | Pon1              | -3.58813 | 0.00005 |
| Optn     | 0.78895 | 0.00035 | Steap2  | -1.10839 | 0.00015 | Tpm1              | -3.58965 | 0.00050 |
| Acbd4    | 0.78775 | 0.01645 | Gas1    | -1.11013 | 0.00005 | Trank1            | -3.60008 | 0.00015 |
| Synpo2   | 0.78766 | 0.00790 | Fmod    | -1.11285 | 0.00020 | Asb16             | -3.62290 | 0.00115 |
| Ppia     | 0.78722 | 0.00290 | Errf1   | -1.12839 | 0.00005 | 1700008F21Rik     | -3.64330 | 0.00690 |
| Lurap1l  | 0.78551 | 0.01195 | Col6a6  | -1.13287 | 0.00035 | Nme5              | -3.64478 | 0.00015 |
| Ttll1    | 0.78381 | 0.03635 | lsm1    | -1.13506 | 0.00555 | lp6k3             | -3.66486 | 0.01935 |
| Nudcd2   | 0.76859 | 0.00385 | Ybx2    | -1.14153 | 0.03520 | Kctd14            | -3.68268 | 0.00165 |
| Aen      | 0.76829 | 0.00420 | Dusp26  | -1.14489 | 0.04160 | Slc8a3            | -3.69055 | 0.00015 |
| Trhde    | 0.76436 | 0.03790 | Syt2    | -1.14857 | 0.03970 | Clcn1             | -3.80511 | 0.00165 |
| Gramd3   | 0.75995 | 0.00320 | Pdlim5  | -1.15315 | 0.00280 | Sh3bgr            | -3.82586 | 0.00005 |
| Sardh    | 0.75762 | 0.03235 | Bmp2    | -1.15549 | 0.00060 | Car14             | -3.83849 | 0.04185 |
| Ltc4s    | 0.75179 | 0.02635 | Clic5   | -1.15681 | 0.00005 | Wdr52             | -3.86906 | 0.03835 |
| Msrb2    | 0.75153 | 0.00685 | Susd4   | -1.16128 | 0.02465 | Asb14             | -3.89789 | 0.00010 |
| Ccr2     | 0.74890 | 0.00050 | Itm2a   | -1.16157 | 0.01985 | Capn3             | -3.90290 | 0.01050 |
| Ctsd     | 0.74853 | 0.01480 | Bmper   | -1.16425 | 0.00005 | Fabp3             | -3.92858 | 0.04875 |
| Eif1a    | 0.74785 | 0.00055 | Susd2   | -1.16737 | 0.00370 | Bex4              | -3.94617 | 0.03955 |
| Sh2d4a   | 0.74561 | 0.03430 | Gulp1   | -1.17027 | 0.00005 | Synpo2l           | -4.01449 | 0.00090 |



|          |         |         |               |          |         |          |          |         |
|----------|---------|---------|---------------|----------|---------|----------|----------|---------|
| Mxra8    | 0.74506 | 0.00685 | Ptp4a3        | -1.17805 | 0.00005 | Alpk2    | -4.01814 | 0.00010 |
| Fam149a  | 0.74495 | 0.00360 | Fst           | -1.18080 | 0.00400 | Impg2    | -4.03642 | 0.00645 |
| Pigs     | 0.74002 | 0.00420 | Ppp1r3c       | -1.18471 | 0.00005 | Casq1    | -4.10069 | 0.00005 |
| Kif21a   | 0.73803 | 0.00335 | Cdh11         | -1.18771 | 0.00210 | Rragd    | -4.12535 | 0.00005 |
| Ccl11    | 0.73595 | 0.04065 | Mal           | -1.19132 | 0.03035 | Trim55   | -4.14690 | 0.03075 |
| Slc25a10 | 0.73391 | 0.00060 | Tbx3          | -1.19401 | 0.00080 | Cnksr1   | -4.17431 | 0.00005 |
| Tenm4    | 0.73176 | 0.00090 | Myo5b         | -1.19476 | 0.03615 | Fndc5    | -4.21897 | 0.00420 |
| Fam213b  | 0.73096 | 0.00165 | Enpp6         | -1.19886 | 0.02070 | Itgb1bp2 | -4.22237 | 0.04310 |
| E2f3     | 0.72427 | 0.02105 | Espn          | -1.20632 | 0.02545 | Asb11    | -4.29117 | 0.00005 |
| Gpt      | 0.72383 | 0.00100 | Adck3         | -1.21180 | 0.02805 | Jsrp1    | -4.29226 | 0.00030 |
| Chek2    | 0.72081 | 0.02320 | Fam180a       | -1.21187 | 0.01390 | Scn4b    | -4.32645 | 0.00005 |
| Plekhn3  | 0.71974 | 0.01620 | Dennd3        | -1.21510 | 0.01290 | Lmod3    | -4.36282 | 0.00005 |
| Epb4.1l2 | 0.71943 | 0.00390 | Slco2a1       | -1.21979 | 0.01330 | Hfe2     | -4.37799 | 0.00005 |
| Fam174b  | 0.71767 | 0.01100 | F830016B08Rik | -1.22406 | 0.00415 | Eno3     | -4.42548 | 0.00005 |
| Hr       | 0.71721 | 0.01295 | Npy1r         | -1.22982 | 0.00410 | Rbm24    | -4.45234 | 0.00015 |
| Als2cr12 | 0.71620 | 0.02060 | Kcnab1        | -1.23322 | 0.00270 | Mup9     | -4.46035 | 0.00030 |
| Pamr1    | 0.71455 | 0.01280 | Osbp2         | -1.23332 | 0.00670 | Tmem116  | -4.48300 | 0.00015 |
| Adora1   | 0.70820 | 0.00255 | Mettl22       | -1.23968 | 0.03300 | Ankrd23  | -4.51917 | 0.00005 |
| Manba    | 0.70809 | 0.04735 | Pfas          | -1.24025 | 0.00555 | Camk2a   | -4.55291 | 0.00005 |
| Gypc     | 0.70776 | 0.00360 | Xk            | -1.24221 | 0.03685 | Plcd4    | -4.55932 | 0.00640 |
| Ubp2     | 0.70590 | 0.02630 | Pdgfrl        | -1.24647 | 0.04165 | Klh31    | -4.65020 | 0.00005 |
| Inhbb    | 0.70563 | 0.00235 | Stard10       | -1.24652 | 0.01325 | Ampd1    | -4.70466 | 0.02940 |
| Itih5    | 0.70443 | 0.02000 | Ccbe1         | -1.25490 | 0.00005 | Smtnl1   | -4.71242 | 0.01725 |
| Myo1d    | 0.70307 | 0.00440 | Fmo3          | -1.25661 | 0.03865 | Sypl2    | -4.78870 | 0.00005 |
| Nedd8    | 0.70144 | 0.00130 | Thsd4         | -1.27942 | 0.01185 | Cacna1s  | -4.79010 | 0.00005 |
| Creb3l2  | 0.69811 | 0.01235 | Sgk1          | -1.28282 | 0.00005 | Hrc      | -4.81630 | 0.00005 |
| Gfra2    | 0.69778 | 0.04770 | Hoxb9         | -1.28995 | 0.02945 | Mybpc1   | -4.86297 | 0.02505 |
| Rab3il1  | 0.69742 | 0.01370 | Mamstr        | -1.29375 | 0.04795 | Ankrd2   | -4.86489 | 0.01135 |
| Stim2    | 0.69712 | 0.01485 | Ankrd33b      | -1.29546 | 0.04915 | Pvalb    | -4.86655 | 0.00005 |
| Kcnk3    | 0.69503 | 0.01445 | Ccl28         | -1.30941 | 0.01985 | Tbx15    | -4.87635 | 0.00005 |
| Fads3    | 0.69308 | 0.00235 | Lipg          | -1.32209 | 0.04835 | Cox6a2   | -4.88252 | 0.03510 |
| Fcrls    | 0.69227 | 0.00950 | Fga           | -1.32398 | 0.04000 | Pygm     | -4.88939 | 0.00005 |
| Nid2     | 0.69129 | 0.03370 | Cnn1          | -1.33900 | 0.00035 | Neb      | -4.90516 | 0.00005 |
| Higd1a   | 0.69080 | 0.00190 | Plxnb1        | -1.34317 | 0.00830 | Ryr1     | -4.94504 | 0.00005 |
| Tmem205  | 0.68946 | 0.01120 | Gm4980        | -1.34716 | 0.01360 | Mylpf    | -4.96638 | 0.00005 |
| Sncg     | 0.68407 | 0.01580 | Crispld1      | -1.34805 | 0.01955 | Mettl21c | -4.97965 | 0.00325 |
| Cspg4    | 0.68256 | 0.01865 | Spa17         | -1.34970 | 0.00150 | Lrrc30   | -4.98595 | 0.01455 |
| Anxa5    | 0.68053 | 0.01865 | 1700019G17Rik | -1.35749 | 0.03930 | Tnnc2    | -5.01756 | 0.00005 |
| Cldn5    | 0.67968 | 0.00335 | 2610018G03Rik | -1.37533 | 0.00240 | Kcna7    | -5.04082 | 0.00090 |
| Kif3a    | 0.67892 | 0.02025 | Fhl3          | -1.37546 | 0.00680 | Ank1     | -5.05053 | 0.00005 |
| Cib2     | 0.67881 | 0.00135 | Cd24a         | -1.39752 | 0.00005 | Asb5     | -5.05609 | 0.03410 |
| Phlda3   | 0.67456 | 0.00710 | Hspb6         | -1.40243 | 0.00005 | Cacng6   | -5.05990 | 0.00460 |
| Atp6v0a1 | 0.67224 | 0.02445 | Phf7          | -1.41877 | 0.00220 | Rbfox1   | -5.06101 | 0.00005 |
| Cilp     | 0.66624 | 0.00735 | Gm216         | -1.42256 | 0.02360 | Abra     | -5.07431 | 0.00005 |

|         |         |         |           |          |         |               |          |         |
|---------|---------|---------|-----------|----------|---------|---------------|----------|---------|
| Scarb1  | 0.66601 | 0.00160 | Hras15    | -1.42538 | 0.03160 | Obscn         | -5.15626 | 0.00005 |
| Eno1    | 0.66141 | 0.00530 | Pgk2      | -1.44063 | 0.01845 | Apobec2       | -5.16246 | 0.03180 |
| Metrn1  | 0.65976 | 0.03145 | Rps18-ps3 | -1.44246 | 0.02785 | Myoz1         | -5.20615 | 0.00005 |
| Dera    | 0.65919 | 0.01355 | Adam5     | -1.44561 | 0.02135 | 2310042D19Rik | -5.21594 | 0.00235 |
| Cdk14   | 0.65661 | 0.00415 | Emx2      | -1.45388 | 0.03140 | Rpl3l         | -5.21835 | 0.00005 |
| Ttc7b   | 0.65259 | 0.00145 | Ociad2    | -1.45544 | 0.02365 | Tnnt3         | -5.23356 | 0.00005 |
| Pmvk    | 0.65240 | 0.01170 | Cabyr     | -1.47562 | 0.03290 | Atp2a1        | -5.24112 | 0.00005 |
| Anxa6   | 0.64931 | 0.00515 | Slco1b2   | -1.48255 | 0.02635 | Tcap          | -5.27237 | 0.00005 |
| Rexo2   | 0.64761 | 0.00205 | Fgfr3     | -1.49841 | 0.00020 | Myh1          | -5.30815 | 0.00005 |
| Atox1   | 0.64709 | 0.00805 | Pknx2     | -1.51517 | 0.00225 | Gm8226        | -5.32053 | 0.00010 |
| Ppp2r5a | 0.64542 | 0.03320 | Tpsb2     | -1.52127 | 0.00705 | Tnni2         | -5.34138 | 0.00005 |
| Mien1   | 0.64268 | 0.00960 | Sptb      | -1.52222 | 0.00620 | Myo18b        | -5.36968 | 0.00100 |
| Lrrc39  | 0.64159 | 0.02715 | Kcnma1    | -1.52251 | 0.03885 | Mylk2         | -5.38465 | 0.00005 |
| Plxnd1  | 0.64076 | 0.00295 | Slc6a17   | -1.53246 | 0.01005 | Myot          | -5.46705 | 0.00005 |
| Ccnd2   | 0.63912 | 0.00345 | Osbpl6    | -1.53307 | 0.00295 | Eef1a2        | -5.49702 | 0.00005 |
| Atg12   | 0.63814 | 0.00255 | Epha3     | -1.53373 | 0.01150 | Myh2          | -5.51072 | 0.00005 |
| Htatip2 | 0.63628 | 0.00765 | Tnik      | -1.53731 | 0.00065 | 2310002L09Rik | -5.53646 | 0.00005 |
| Mc2r    | 0.63613 | 0.00760 | Pcp4l1    | -1.54165 | 0.00045 | Mybpc2        | -5.62973 | 0.00005 |
| Cd55    | 0.63553 | 0.00365 | Dkk3      | -1.54641 | 0.00100 | Ckm           | -5.66541 | 0.00005 |
| Zfp931  | 0.63458 | 0.02265 | Cpt1b     | -1.54880 | 0.02435 | Trim54        | -5.75953 | 0.00405 |
| Stam2   | 0.62643 | 0.01875 | Agl       | -1.55292 | 0.00005 | Myf6          | -5.92166 | 0.03935 |
| Blvra   | 0.62518 | 0.00500 | Amph      | -1.55661 | 0.01990 | Scn4a         | -6.26408 | 0.00145 |
| B3galt1 | 0.62446 | 0.00935 | Rilpl1    | -1.55774 | 0.00005 |               |          |         |
| Kctd3   | 0.62276 | 0.00580 | Cand2     | -1.56116 | 0.00805 |               |          |         |

## 1420 genes were selectively dysregulated in the eWAT of NASH mice.

| Gene name | log2 (fold change) | P value | Gene name | log2 (fold change) | P value | Gene name     | log2 (fold change) | P value |
|-----------|--------------------|---------|-----------|--------------------|---------|---------------|--------------------|---------|
| Myh6      | 10.29220           | 0.00020 | Cep128    | 1.14712            | 0.03860 | Lrrn4cl       | -0.86062           | 0.01190 |
| Mybpc3    | 7.80933            | 0.03715 | Cd53      | 1.14684            | 0.00110 | Chchd6        | -0.86195           | 0.01725 |
| Ryr2      | 6.60232            | 0.01250 | Ly6c2     | 1.14228            | 0.04420 | Trpv4         | -0.86260           | 0.04745 |
| Myh7      | 6.31324            | 0.00005 | Gm5431    | 1.14195            | 0.03360 | 1810011O10Rik | -0.86286           | 0.00720 |
| Itgad     | 5.96893            | 0.00580 | Tmem184c  | 1.14104            | 0.00165 | Flywch1       | -0.86333           | 0.02105 |
| Ankrd1    | 5.93003            | 0.00005 | Dpy19l3   | 1.13757            | 0.02955 | Flnb          | -0.86372           | 0.00675 |
| Neb1      | 5.70910            | 0.00005 | Man1a2    | 1.13450            | 0.04480 | Ackr3         | -0.86378           | 0.00650 |
| Sptlc3    | 5.58554            | 0.02860 | Ube2d3    | 1.13358            | 0.00265 | Lypla2        | -0.86393           | 0.02595 |
| Faxc      | 5.58274            | 0.00005 | Cyfp2     | 1.13175            | 0.02045 | Fam117a       | -0.86530           | 0.02515 |
| Casq2     | 5.27567            | 0.00005 | Ica1      | 1.12764            | 0.02670 | Zdhhc18       | -0.86539           | 0.04100 |
| Arl14ep1  | 4.95089            | 0.01715 | Lrif1     | 1.12719            | 0.01510 | Tmem201       | -0.86541           | 0.02280 |
| Gdf3      | 4.74314            | 0.00540 | Cul3      | 1.12578            | 0.03035 | Alkbh3        | -0.86555           | 0.03345 |

|               |         |         |          |         |         |               |          |         |
|---------------|---------|---------|----------|---------|---------|---------------|----------|---------|
| Gm15448       | 4.71678 | 0.00045 | Ccl5     | 1.12502 | 0.04920 | Oplah         | -0.86687 | 0.02610 |
| Tm4sf19       | 4.49052 | 0.00260 | Cxcl14   | 1.12379 | 0.03215 | 1600014C10Rik | -0.86729 | 0.00585 |
| Dsp           | 4.25098 | 0.00005 | Ifi30    | 1.12200 | 0.02515 | S100a10       | -0.86792 | 0.00690 |
| Cdkl4         | 4.22781 | 0.00005 | Scal     | 1.11729 | 0.01540 | Jag2          | -0.86919 | 0.03625 |
| Hist1h4d      | 4.20481 | 0.00020 | Tmem176a | 1.11673 | 0.00155 | Farp1         | -0.86990 | 0.02160 |
| Pla2g5        | 4.11559 | 0.00005 | P2rx7    | 1.11636 | 0.00170 | Ppp1r37       | -0.87061 | 0.00865 |
| Rgs1          | 3.91132 | 0.00005 | Emb      | 1.11598 | 0.00730 | Fcgrt         | -0.87130 | 0.01925 |
| Car12         | 3.90301 | 0.00005 | H2-Q7    | 1.11173 | 0.03415 | Islr          | -0.87211 | 0.01080 |
| Myl3          | 3.87304 | 0.00005 | Ppfbp2   | 1.11118 | 0.01635 | Mrpl36        | -0.87352 | 0.02645 |
| Sycp3         | 3.83675 | 0.00040 | Ccdc41   | 1.11111 | 0.00285 | Plcd1         | -0.87379 | 0.03020 |
| Eya1          | 3.83171 | 0.00005 | Rock1    | 1.11009 | 0.00130 | Retsat        | -0.87450 | 0.01485 |
| Htr1b         | 3.81877 | 0.02980 | Capza2   | 1.10715 | 0.04135 | Ndufa2        | -0.87462 | 0.01365 |
| Kcnj12        | 3.75422 | 0.00020 | Lrrc25   | 1.10641 | 0.01350 | Klf2          | -0.87778 | 0.00795 |
| Lonrf3        | 3.69672 | 0.00010 | Fbln7    | 1.10489 | 0.04895 | 2510002D24Rik | -0.87943 | 0.03285 |
| Pgbd5         | 3.61781 | 0.00190 | Rgs10    | 1.10320 | 0.00430 | Repin1        | -0.87963 | 0.02020 |
| Cd180         | 3.56565 | 0.02010 | Strn     | 1.10275 | 0.01045 | Gng11         | -0.87995 | 0.02130 |
| Trem2         | 3.52121 | 0.00005 | Ptpro    | 1.09633 | 0.01760 | Tspan2        | -0.88068 | 0.03465 |
| Dusp27        | 3.48796 | 0.00015 | Rmdn2    | 1.09625 | 0.01595 | Ilkap         | -0.88142 | 0.01675 |
| Gm10184       | 3.48373 | 0.00725 | Brwd3    | 1.08255 | 0.02795 | Ndufb8        | -0.88199 | 0.01285 |
| Ngef          | 3.47530 | 0.00125 | Pola1    | 1.08151 | 0.01285 | Vamp2         | -0.88220 | 0.01000 |
| Faim3         | 3.46075 | 0.00155 | Pgap1    | 1.07899 | 0.00845 | Ndufb9        | -0.88271 | 0.00635 |
| Adh6b         | 3.45663 | 0.03085 | Plxnc1   | 1.07742 | 0.01860 | Klhl12        | -0.88337 | 0.03075 |
| Depdc1a       | 3.42262 | 0.00090 | Mad2l1   | 1.07140 | 0.03555 | Flad1         | -0.88478 | 0.01110 |
| 4930502E18Rik | 3.39232 | 0.00125 | Il2rb    | 1.07094 | 0.04640 | Enc1          | -0.88554 | 0.00495 |
| Vsig8         | 3.25914 | 0.03745 | Sparc    | 1.07014 | 0.01735 | H2afj         | -0.88627 | 0.00940 |
| Tlr13         | 3.24225 | 0.00005 | Ywhae    | 1.06618 | 0.01340 | Ndufa12       | -0.88650 | 0.01935 |
| Adam8         | 3.23098 | 0.00005 | Dlg3     | 1.06595 | 0.01170 | Cyc1          | -0.88755 | 0.00725 |
| Zranb3        | 3.16640 | 0.00275 | Arhgap15 | 1.06518 | 0.02630 | Eif1          | -0.88862 | 0.01675 |
| Art4          | 3.16527 | 0.00395 | Wdr44    | 1.06512 | 0.01040 | Atp2b4        | -0.88966 | 0.00285 |
| Hist1h2bb     | 3.15443 | 0.00010 | Col28a1  | 1.06468 | 0.03455 | Akap8l        | -0.89065 | 0.01075 |
| Brca1         | 3.15012 | 0.00005 | Fam73a   | 1.06379 | 0.03265 | Prr24         | -0.89159 | 0.02460 |
| Ogdhl         | 3.11871 | 0.00005 | Tifab    | 1.06341 | 0.03185 | Dmwd          | -0.89206 | 0.01750 |
| Slc37a2       | 3.11276 | 0.00005 | Npl      | 1.06204 | 0.03400 | Insig2        | -0.89236 | 0.00520 |
| Olf158        | 3.08193 | 0.00020 | Mrc1     | 1.06049 | 0.00160 | Atp5k         | -0.89585 | 0.00955 |
| Mmp12         | 3.02748 | 0.00005 | Ms4a6c   | 1.06025 | 0.00465 | Eci1          | -0.89667 | 0.00495 |
| Kif15         | 3.02189 | 0.00020 | Pla2g2d  | 1.05608 | 0.01350 | Amacr         | -0.89745 | 0.04330 |
| Dhrs9         | 2.99852 | 0.00005 | Ifi203   | 1.05399 | 0.03735 | Phyh          | -0.90002 | 0.00295 |
| Clec12a       | 2.97753 | 0.00005 | Kcnab2   | 1.05245 | 0.01320 | Gpr153        | -0.90175 | 0.03045 |
| Rsad2         | 2.96271 | 0.00005 | Rbm41    | 1.05048 | 0.04120 | Mib2          | -0.90267 | 0.03235 |
| St14          | 2.95757 | 0.00005 | Dmnl1    | 1.04792 | 0.00935 | BC003965      | -0.90338 | 0.01040 |
| Ms4a4c        | 2.94825 | 0.00195 | Slc11a1  | 1.04644 | 0.00535 | Uqcrq         | -0.90487 | 0.01090 |
| Fcgr4         | 2.94762 | 0.00220 | Irx3     | 1.04225 | 0.03760 | Met           | -0.90495 | 0.01285 |
| BC030867      | 2.92235 | 0.00370 | Ubt2     | 1.04019 | 0.03650 | Amotl2        | -0.90590 | 0.02495 |
| Lect1         | 2.91786 | 0.00480 | Cobll1   | 1.03692 | 0.03745 | Mmaa          | -0.90615 | 0.01690 |

|                |         |         |         |         |         |          |          |         |
|----------------|---------|---------|---------|---------|---------|----------|----------|---------|
| Tlr8           | 2.90479 | 0.00005 | Plin2   | 1.03663 | 0.03125 | Mrpl38   | -0.90616 | 0.01025 |
| Tekt1          | 2.85260 | 0.00245 | Slmap   | 1.03563 | 0.01250 | Zmym6    | -0.90661 | 0.02015 |
| Ccne2          | 2.84775 | 0.03300 | Fgd3    | 1.03205 | 0.03440 | Safb2    | -0.90669 | 0.03415 |
| Mybl1          | 2.81947 | 0.00800 | Tbc1d8b | 1.02677 | 0.01170 | Atp5e    | -0.90692 | 0.00980 |
| Efcab11        | 2.81145 | 0.01480 | Sipa1l1 | 1.02672 | 0.00180 | Josd2    | -0.90704 | 0.03550 |
| Dcstamp        | 2.79644 | 0.00130 | Nedd1   | 1.02321 | 0.00760 | Tspan7   | -0.90808 | 0.00520 |
| Gm4952         | 2.78028 | 0.00345 | Erg     | 1.02209 | 0.02040 | Fn1      | -0.91040 | 0.00605 |
| Slc29a4        | 2.75933 | 0.00370 | Gsap    | 1.01917 | 0.03870 | Rfx1     | -0.91305 | 0.03350 |
| Ccdc141        | 2.74996 | 0.00090 | Col1a1  | 1.01728 | 0.00120 | Bckdha   | -0.91442 | 0.00475 |
| Pbx3           | 2.74675 | 0.00005 | Adcy7   | 1.01503 | 0.00305 | Mettl7a1 | -0.91488 | 0.00340 |
| F7             | 2.74569 | 0.00035 | Naip6   | 1.01452 | 0.04050 | Ppp1r15b | -0.91544 | 0.00720 |
| Klrb1c         | 2.73520 | 0.00215 | Kalrn   | 1.01207 | 0.04920 | Mcat     | -0.91810 | 0.01790 |
| Tcerg1l        | 2.73206 | 0.00200 | Gusb    | 1.00916 | 0.00130 | Atp5sl   | -0.92024 | 0.03180 |
| Pik3ap1        | 2.71715 | 0.00005 | Btc     | 1.00902 | 0.00725 | Cox8a    | -0.92285 | 0.00595 |
| Sgip1          | 2.70690 | 0.00855 | Snap23  | 1.00847 | 0.01715 | Sdad1    | -0.92321 | 0.01840 |
| Prf1           | 2.69156 | 0.00800 | Cacna1e | 1.00736 | 0.01255 | Nova1    | -0.92350 | 0.00930 |
| Gas2l2         | 2.68410 | 0.00025 | Adra1d  | 1.00554 | 0.04190 | ldh3b    | -0.92362 | 0.00850 |
| Lair1          | 2.65384 | 0.00010 | Parp14  | 1.00383 | 0.00110 | Gstp1    | -0.92434 | 0.01050 |
| Il1rn          | 2.65359 | 0.00005 | Sirpa   | 1.00278 | 0.01470 | Ddx19b   | -0.92518 | 0.02115 |
| Pianp          | 2.64928 | 0.00015 | Ube2d1  | 1.00099 | 0.00665 | Zfp865   | -0.92609 | 0.02770 |
| Ska3           | 2.64427 | 0.02430 | Dbf4    | 1.00097 | 0.04830 | Tspo     | -0.92643 | 0.00710 |
| Nrip2          | 2.62043 | 0.00200 | Bod1l   | 1.00001 | 0.00845 | Shpk     | -0.92743 | 0.03335 |
| Cd22           | 2.59816 | 0.00315 | Cd48    | 0.99884 | 0.01195 | Eil      | -0.92855 | 0.00815 |
| Cd84           | 2.59541 | 0.00005 | Tank    | 0.99849 | 0.00650 | Aatk     | -0.92910 | 0.01490 |
| Ccdc88a        | 2.58728 | 0.00060 | Aoah    | 0.99737 | 0.03930 | Cebpa    | -0.93060 | 0.01205 |
| Cd72           | 2.58325 | 0.00675 | Ogn     | 0.99621 | 0.02805 | Gstt2    | -0.93374 | 0.00980 |
| Gm14409        | 2.55806 | 0.00050 | Hif1a   | 0.99349 | 0.00250 | Dact1    | -0.93420 | 0.01535 |
| Gm14403        | 2.52763 | 0.01135 | Rab27a  | 0.99309 | 0.03095 | Stk40    | -0.93457 | 0.00615 |
| Pkib           | 2.52132 | 0.00155 | Ccng1   | 0.98987 | 0.00115 | Dhx16    | -0.93532 | 0.03855 |
| Plxdc1         | 2.51634 | 0.00030 | Gpc6    | 0.98898 | 0.01455 | Acad10   | -0.93573 | 0.03325 |
| Arhgap25       | 2.51315 | 0.00010 | Cpa3    | 0.98556 | 0.04785 | Clpp     | -0.93611 | 0.00680 |
| Mbnl3          | 2.51231 | 0.00245 | Stk3    | 0.98543 | 0.01250 | Gpx1     | -0.93987 | 0.00730 |
| Dlgap5         | 2.50463 | 0.00750 | Frrs1   | 0.98538 | 0.02690 | Sulf1    | -0.94209 | 0.00815 |
| Tnfsf10        | 2.50280 | 0.00005 | Pter    | 0.98329 | 0.02910 | Ccdc85b  | -0.94250 | 0.03220 |
| Card11         | 2.50206 | 0.00095 | Tpcn2   | 0.98214 | 0.03660 | Sgta     | -0.94567 | 0.00410 |
| Wisp2          | 2.49901 | 0.00005 | Pgm2l1  | 0.98139 | 0.03205 | Pfkfb1   | -0.94642 | 0.01765 |
| Ddx4           | 2.48111 | 0.00425 | Sh3bp2  | 0.98138 | 0.02690 | Car5b    | -0.94762 | 0.00215 |
| Mmp27          | 2.47780 | 0.00330 | Plscr4  | 0.98056 | 0.00590 | Pi16     | -0.94832 | 0.01800 |
| Tnip3          | 2.47097 | 0.00055 | P2ry6   | 0.97999 | 0.01115 | Pygb     | -0.94846 | 0.04785 |
| Calr4          | 2.45803 | 0.00245 | Hspb11  | 0.97811 | 0.04850 | Mgst3    | -0.94969 | 0.00425 |
| Aff2           | 2.44779 | 0.00185 | Tsc22d2 | 0.97684 | 0.02525 | Mettl20  | -0.94998 | 0.03005 |
| Slfn9          | 2.44503 | 0.00015 | Map2k4  | 0.97545 | 0.04655 | Tut1     | -0.95183 | 0.02900 |
| Lat2           | 2.43848 | 0.00005 | Epsti1  | 0.97524 | 0.03025 | Bok      | -0.95305 | 0.01765 |
| 9930111J21Rik2 | 2.43705 | 0.00865 | Twistnb | 0.97455 | 0.02475 | Dak      | -0.95373 | 0.04770 |

|          |         |         |               |         |         |               |          |         |
|----------|---------|---------|---------------|---------|---------|---------------|----------|---------|
| Mis18bp1 | 2.43670 | 0.00160 | Hltf          | 0.97415 | 0.04095 | Hsd3b7        | -0.96030 | 0.02060 |
| Melk     | 2.43570 | 0.00185 | Mycbp2        | 0.97271 | 0.00595 | Asb13         | -0.96220 | 0.02035 |
| AF251705 | 2.43537 | 0.00010 | Arhgap9       | 0.97167 | 0.02685 | Trip6         | -0.96257 | 0.00790 |
| Dpep2    | 2.43187 | 0.02920 | Arid4a        | 0.97148 | 0.01035 | Lrig1         | -0.96276 | 0.02585 |
| Kif20b   | 2.40656 | 0.00020 | Ptpre         | 0.96873 | 0.02220 | Rgma          | -0.96411 | 0.00420 |
| Il7r     | 2.39883 | 0.00005 | Ifit2         | 0.96791 | 0.01920 | Ifrd2         | -0.96488 | 0.01850 |
| Olfml3   | 2.39276 | 0.00005 | Crebrf        | 0.96618 | 0.02835 | Hsd17b10      | -0.96779 | 0.00400 |
| Slc15a3  | 2.39018 | 0.00235 | Atad2         | 0.96433 | 0.02115 | Mmp28         | -0.96782 | 0.00515 |
| Cenph    | 2.37248 | 0.02180 | Ets2          | 0.96406 | 0.03265 | A530016L24Rik | -0.96844 | 0.00265 |
| Rasgef1a | 2.36788 | 0.00275 | Cyp51         | 0.96406 | 0.00570 | Slc4a3        | -0.96850 | 0.03500 |
| Mpeg1    | 2.36429 | 0.00005 | Malt1         | 0.96132 | 0.00630 | Als2cl        | -0.96884 | 0.01870 |
| Nos1ap   | 2.36246 | 0.01865 | Sept7         | 0.96044 | 0.00400 | Mapk12        | -0.96979 | 0.02125 |
| Myo1e    | 2.36056 | 0.00005 | Eps8          | 0.95905 | 0.01700 | Med28         | -0.97258 | 0.00700 |
| Nceh1    | 2.35903 | 0.00005 | Phtf2         | 0.95667 | 0.02065 | Rarb          | -0.97274 | 0.04890 |
| Htr2a    | 2.35762 | 0.00530 | Pik3cg        | 0.95522 | 0.02830 | Rras          | -0.97315 | 0.00150 |
| Gm5150   | 2.35259 | 0.03720 | Prps1l3       | 0.95457 | 0.03920 | Pla1a         | -0.97677 | 0.00590 |
| Rasgef1b | 2.35151 | 0.00040 | Taok3         | 0.95188 | 0.00845 | Trim28        | -0.97726 | 0.03210 |
| Evi2b    | 2.33650 | 0.01665 | Wwp1          | 0.95028 | 0.02010 | Isoc2a        | -0.97802 | 0.00370 |
| Emr4     | 2.31795 | 0.00145 | App           | 0.94876 | 0.01970 | Adcy4         | -0.97852 | 0.01165 |
| Glipr1   | 2.31628 | 0.04040 | Abcg2         | 0.94308 | 0.00970 | Safb          | -0.97934 | 0.04885 |
| Xcl1     | 2.29973 | 0.04165 | Pltp          | 0.94119 | 0.04490 | Zfp213        | -0.97958 | 0.04785 |
| Myo1f    | 2.29623 | 0.00005 | Ap1s2         | 0.93504 | 0.01770 | Rrs1          | -0.98035 | 0.00490 |
| Gli2     | 2.29548 | 0.02930 | Rsrc1         | 0.93370 | 0.04635 | Gas6          | -0.98152 | 0.00235 |
| Zbp1     | 2.29546 | 0.00050 | Mlki          | 0.93369 | 0.03605 | Syne3         | -0.98282 | 0.00770 |
| Hpgds    | 2.28679 | 0.00005 | A530054K11Rik | 0.93307 | 0.02465 | Tbrg4         | -0.98310 | 0.00925 |
| Tmem47   | 2.28585 | 0.00730 | Fkbp7         | 0.93292 | 0.01080 | Uqcr11        | -0.98486 | 0.00460 |
| Etv1     | 2.27347 | 0.00435 | Tmem38b       | 0.93190 | 0.03665 | Ndufa13       | -0.98509 | 0.00385 |
| Gzma     | 2.26690 | 0.01850 | Ncf2          | 0.93184 | 0.01210 | Fxyd2         | -0.98748 | 0.02980 |
| Stap1    | 2.26101 | 0.00370 | Calcr1        | 0.93026 | 0.04090 | Gtf2h4        | -0.98756 | 0.03235 |
| Rel      | 2.25803 | 0.00205 | Fblim1        | 0.92892 | 0.00580 | Nip7          | -0.98909 | 0.03785 |
| Itga4    | 2.25291 | 0.00105 | Dtx4          | 0.92676 | 0.00975 | Irs1          | -0.99037 | 0.00530 |
| Angptl1  | 2.24099 | 0.01590 | Zeb2          | 0.92653 | 0.00740 | Phldb1        | -0.99224 | 0.01020 |
| Gm10521  | 2.23870 | 0.00160 | Tmed5         | 0.92653 | 0.02345 | Der1          | -0.99442 | 0.00300 |
| Tk1      | 2.23487 | 0.04390 | Zfp51         | 0.92529 | 0.04875 | Hspa12b       | -0.99536 | 0.00260 |
| Ccdc37   | 2.22395 | 0.00460 | C5ar1         | 0.92423 | 0.00765 | Mrps16        | -0.99681 | 0.01555 |
| Cux2     | 2.20947 | 0.00135 | Ptprj         | 0.92282 | 0.00925 | Mief2         | -0.99715 | 0.04900 |
| Cd3e     | 2.20056 | 0.00445 | 1110059E24Rik | 0.92070 | 0.03180 | Adprhl2       | -0.99929 | 0.01600 |
| Fhl2     | 2.19636 | 0.00025 | Plekhf2       | 0.91722 | 0.03475 | Emp2          | -1.00048 | 0.01055 |
| Xlr      | 2.17644 | 0.00640 | Dnmt3a        | 0.91629 | 0.01110 | Pdpn          | -1.00050 | 0.01040 |
| Ppp4r1   | 2.17566 | 0.02860 | Rnf149        | 0.91587 | 0.00690 | Scara3        | -1.00147 | 0.00665 |
| Atp8b4   | 2.17507 | 0.00005 | Herc3         | 0.91387 | 0.01725 | Atp5g2        | -1.00405 | 0.01115 |
| Fam167b  | 2.17137 | 0.00985 | Selplg        | 0.91170 | 0.00990 | Cpsf3l        | -1.00567 | 0.04300 |
| Rgs6     | 2.16174 | 0.04280 | Pip4k2a       | 0.90992 | 0.00515 | Plk3          | -1.00623 | 0.04745 |
| Igsf21   | 2.16152 | 0.00405 | Cxcl9         | 0.90878 | 0.00865 | Zfp503        | -1.00687 | 0.00275 |

|               |         |         |         |         |         |               |          |         |
|---------------|---------|---------|---------|---------|---------|---------------|----------|---------|
| Arl11         | 2.15166 | 0.00060 | Glrx    | 0.90781 | 0.04505 | Socs3         | -1.00800 | 0.03285 |
| Pde7a         | 2.15116 | 0.00005 | lqgap1  | 0.90750 | 0.00310 | Cacnb3        | -1.01015 | 0.04000 |
| Aspm          | 2.14723 | 0.00045 | Galc    | 0.90541 | 0.00860 | Pcbp4         | -1.01021 | 0.00930 |
| Clec5a        | 2.14455 | 0.00540 | Xrn2    | 0.90409 | 0.04805 | 1110001J03Rik | -1.01084 | 0.03205 |
| Pvrl4         | 2.13979 | 0.00260 | Sfr1    | 0.90037 | 0.00490 | Ngdn          | -1.01173 | 0.01140 |
| Emid1         | 2.12755 | 0.01975 | Prrx1   | 0.89921 | 0.01220 | Cecr5         | -1.01377 | 0.02610 |
| Gm5900        | 2.11887 | 0.01930 | Ehd4    | 0.89752 | 0.00405 | Csad          | -1.01635 | 0.00205 |
| A630033H20Rik | 2.11867 | 0.00085 | Apc     | 0.89519 | 0.02680 | Hic1          | -1.01818 | 0.03755 |
| Dnajc6        | 2.11125 | 0.00005 | P2ry1   | 0.89442 | 0.03435 | Proca1        | -1.02106 | 0.00465 |
| F10           | 2.10248 | 0.00250 | Ifih1   | 0.89380 | 0.00990 | Fmo5          | -1.02156 | 0.00240 |
| Gm13212       | 2.09881 | 0.01770 | Map9    | 0.89335 | 0.01450 | Bckdhhb       | -1.02380 | 0.00180 |
| Gas2l3        | 2.09773 | 0.00020 | Ssb     | 0.89136 | 0.02845 | Pdlim1        | -1.02441 | 0.03615 |
| Slc25a13      | 2.09095 | 0.00240 | Birc3   | 0.89103 | 0.02800 | Dpysl3        | -1.02474 | 0.03180 |
| Tll1          | 2.08803 | 0.00295 | Lmbrd2  | 0.89101 | 0.03630 | Id3           | -1.02976 | 0.01025 |
| Map2k6        | 2.08654 | 0.00185 | Gmpr    | 0.89086 | 0.04625 | Npdc1         | -1.03272 | 0.00955 |
| Havcr2        | 2.08354 | 0.00340 | Pirb    | 0.89014 | 0.01145 | Ackr2         | -1.03411 | 0.03370 |
| Zfp37         | 2.06620 | 0.00120 | Figf    | 0.88955 | 0.01005 | Adc           | -1.03542 | 0.03355 |
| Panx1         | 2.06567 | 0.00360 | Plcl2   | 0.88912 | 0.02365 | Ier3          | -1.03764 | 0.03865 |
| Zim1          | 2.05514 | 0.00470 | Plk2    | 0.88796 | 0.01820 | Pitpnm3       | -1.03913 | 0.04215 |
| Blm           | 2.04055 | 0.03160 | Cd93    | 0.88744 | 0.00525 | Wnt9a         | -1.04196 | 0.04725 |
| Top2b         | 2.03554 | 0.01195 | Abcc9   | 0.88695 | 0.00830 | Angptl2       | -1.04260 | 0.00210 |
| Lrp4          | 2.03522 | 0.00105 | Cotl1   | 0.88440 | 0.00925 | Zfp703        | -1.04305 | 0.00220 |
| Lox           | 2.03452 | 0.00005 | Vav3    | 0.88076 | 0.03695 | Spryd4        | -1.04377 | 0.04820 |
| C3ar1         | 2.03284 | 0.00005 | Mical2  | 0.87842 | 0.01120 | Pycr1         | -1.04606 | 0.01660 |
| Gm14410       | 2.02574 | 0.01895 | Slc4a7  | 0.87712 | 0.00760 | Rplp2         | -1.04674 | 0.00880 |
| Ifit1         | 2.02324 | 0.00005 | Dek     | 0.87492 | 0.01275 | Eif4ebp1      | -1.04813 | 0.00180 |
| Gnao1         | 2.01984 | 0.01495 | Phactr2 | 0.87233 | 0.02335 | Fam193b       | -1.04878 | 0.00305 |
| Hk3           | 2.01332 | 0.02355 | Mblac2  | 0.86909 | 0.04315 | Tmem159       | -1.04899 | 0.00195 |
| Gm13139       | 2.00469 | 0.01295 | Usp12   | 0.86651 | 0.04745 | Pnpla2        | -1.05054 | 0.03885 |
| Armc2         | 2.00244 | 0.03440 | Pqbp1   | 0.86432 | 0.02625 | Grb10         | -1.05443 | 0.00075 |
| Gm13154       | 1.99091 | 0.01655 | Filip1l | 0.86420 | 0.02380 | BC029214      | -1.05795 | 0.04125 |
| Tlr1          | 1.98953 | 0.00495 | Ikzf1   | 0.86376 | 0.03100 | Slc9a3r2      | -1.06217 | 0.00245 |
| Slc16a14      | 1.97630 | 0.01895 | Cstb    | 0.86217 | 0.00865 | Six5          | -1.06637 | 0.01500 |
| Klhb3         | 1.96902 | 0.01555 | Chm     | 0.86052 | 0.04260 | Trim8         | -1.06650 | 0.00225 |
| Ntm           | 1.96871 | 0.00285 | Gmfb    | 0.85762 | 0.00400 | Dnajb2        | -1.06698 | 0.01635 |
| Sifn3         | 1.96305 | 0.00645 | Gimap4  | 0.85739 | 0.04050 | Vegfb         | -1.06895 | 0.00145 |
| Cdk1          | 1.95706 | 0.00985 | Slc41a2 | 0.85708 | 0.03010 | Hint3         | -1.07038 | 0.01535 |
| Cd200r4       | 1.95621 | 0.01455 | Tmem37  | 0.85602 | 0.03965 | Lzts2         | -1.07042 | 0.00585 |
| Lepr          | 1.95076 | 0.00110 | Fam124a | 0.85474 | 0.02680 | Ddhd2         | -1.07052 | 0.00125 |
| Btla          | 1.94602 | 0.00675 | Nrep    | 0.85371 | 0.04025 | Hint2         | -1.07351 | 0.00425 |
| Cd300lb       | 1.94011 | 0.00005 | Psme4   | 0.84891 | 0.01800 | Mfng          | -1.07468 | 0.00840 |
| Cd68          | 1.92605 | 0.00005 | Zfp943  | 0.84554 | 0.04975 | Grhpr         | -1.07745 | 0.00325 |
| Acsl3         | 1.92477 | 0.00385 | Slc40a1 | 0.84469 | 0.03245 | Zbtb5         | -1.08005 | 0.00265 |
| Lgals3        | 1.92281 | 0.00005 | Cpeb2   | 0.84248 | 0.01425 | Mknk2         | -1.08524 | 0.00155 |

|          |         |         |          |         |         |               |          |         |
|----------|---------|---------|----------|---------|---------|---------------|----------|---------|
| Etohi1   | 1.92070 | 0.00030 | Amer1    | 0.84216 | 0.02750 | Mafg          | -1.08668 | 0.01545 |
| Clec4n   | 1.91532 | 0.04090 | Abhd17b  | 0.83794 | 0.01640 | 1810043H04Rik | -1.08793 | 0.02075 |
| Syt15    | 1.91000 | 0.00295 | Rasal2   | 0.83653 | 0.03630 | Thrsp         | -1.09068 | 0.00155 |
| Lrrc3b   | 1.90424 | 0.01535 | Map7     | 0.83572 | 0.02925 | Mapk8ip3      | -1.09152 | 0.01205 |
| Blnk     | 1.90350 | 0.00010 | Fgd6     | 0.83316 | 0.03340 | Glipr2        | -1.09162 | 0.00650 |
| Clec4a2  | 1.90056 | 0.00005 | Erlec1   | 0.83139 | 0.02425 | Akr1c14       | -1.09305 | 0.01365 |
| Tpd52    | 1.89418 | 0.00015 | Dennd4a  | 0.82918 | 0.01410 | Snhg11        | -1.09863 | 0.00045 |
| Hapln3   | 1.87287 | 0.00930 | Lamp2    | 0.82699 | 0.04590 | Ltbp4         | -1.09909 | 0.01430 |
| Lilrb4   | 1.87187 | 0.00025 | Mbnl2    | 0.82477 | 0.01225 | Sema4a        | -1.10009 | 0.00205 |
| Ckap2l   | 1.86698 | 0.00210 | Smarca5  | 0.82358 | 0.02335 | Klf15         | -1.10091 | 0.00105 |
| Lrch2    | 1.86549 | 0.00465 | KCTD12   | 0.82266 | 0.00845 | Sdr39u1       | -1.10094 | 0.00825 |
| Acpl2    | 1.86459 | 0.02050 | Lars2    | 0.82174 | 0.03625 | Dusp28        | -1.10192 | 0.02285 |
| Gm2058   | 1.86078 | 0.00215 | Rngtt    | 0.81766 | 0.04285 | Dusp4         | -1.10210 | 0.00995 |
| Limch1   | 1.86066 | 0.00005 | Hcls1    | 0.81164 | 0.01800 | Sox13         | -1.10325 | 0.01490 |
| Zfp59    | 1.85705 | 0.00825 | Mier1    | 0.80930 | 0.04785 | Hspa1b        | -1.10445 | 0.00680 |
| Gys2     | 1.85658 | 0.02765 | Cyth4    | 0.80927 | 0.01910 | Chrd          | -1.10801 | 0.02020 |
| F2r      | 1.85478 | 0.00005 | Mmp2     | 0.80847 | 0.02205 | Slc1a5        | -1.10855 | 0.00995 |
| Mfap3l   | 1.85278 | 0.00005 | Ap3s1    | 0.80752 | 0.01490 | Slc22a23      | -1.11180 | 0.00300 |
| Fam64a   | 1.85091 | 0.00950 | Prps2    | 0.80544 | 0.02025 | Prpf40b       | -1.11224 | 0.03145 |
| Tmem144  | 1.83984 | 0.01205 | Tmem106b | 0.80538 | 0.04780 | Trim39        | -1.11278 | 0.00530 |
| Gm11127  | 1.83350 | 0.02235 | Creg1    | 0.80455 | 0.02660 | Cd248         | -1.11547 | 0.00090 |
| Ppfia4   | 1.83097 | 0.00295 | Nxt2     | 0.80437 | 0.02920 | Arsi          | -1.11583 | 0.04000 |
| Clec1a   | 1.83029 | 0.00055 | Ptpn2    | 0.80357 | 0.04765 | Trmu          | -1.11635 | 0.03665 |
| Cd79b    | 1.82942 | 0.00845 | Ppp1cb   | 0.80187 | 0.03140 | Eci3          | -1.11655 | 0.00530 |
| Nlrc3    | 1.81965 | 0.00270 | Tnfrsf1b | 0.80058 | 0.02110 | Dalrd3        | -1.12357 | 0.03980 |
| Nxpe2    | 1.80998 | 0.03535 | Rgs5     | 0.79684 | 0.01235 | Rccd1         | -1.12518 | 0.01640 |
| Adh6-ps1 | 1.80950 | 0.03895 | Pdcl     | 0.79527 | 0.04755 | Elmod3        | -1.12540 | 0.00305 |
| Ly9      | 1.80828 | 0.00040 | Atf7ip   | 0.79359 | 0.01950 | Zxdb          | -1.12650 | 0.03975 |
| Adam23   | 1.80097 | 0.00120 | Nucb2    | 0.79272 | 0.02910 | Tef           | -1.12692 | 0.00210 |
| Gbp9     | 1.79781 | 0.00085 | Man1c1   | 0.79217 | 0.01965 | 2300009A05Rik | -1.12887 | 0.01140 |
| Apobec1  | 1.78885 | 0.00030 | Abr      | 0.79054 | 0.03095 | Dhtkd1        | -1.13465 | 0.00500 |
| Gm14305  | 1.78873 | 0.00305 | Fam63b   | 0.78573 | 0.01615 | Timp4         | -1.13526 | 0.00110 |
| Bcat1    | 1.78823 | 0.00115 | Rrm1     | 0.78128 | 0.03730 | Tkt           | -1.13881 | 0.00060 |
| Bcl2a1b  | 1.78420 | 0.04630 | Tpm3-rs7 | 0.77776 | 0.04435 | Kctd15        | -1.14026 | 0.00565 |
| Apod     | 1.78157 | 0.00005 | Hmox1    | 0.77662 | 0.02090 | Rnft2         | -1.14037 | 0.03130 |
| Spdl1    | 1.77856 | 0.00830 | Prkch    | 0.77605 | 0.04255 | Cyp26b1       | -1.14817 | 0.03320 |
| Bdnf     | 1.77740 | 0.00075 | Larp7    | 0.77582 | 0.04730 | Opn3          | -1.15020 | 0.00160 |
| Itga8    | 1.77388 | 0.02815 | Sh3kbp1  | 0.77436 | 0.02655 | Slc2a4        | -1.15183 | 0.00050 |
| Evl      | 1.77372 | 0.00665 | Sparcl1  | 0.77358 | 0.04240 | Wdr34         | -1.15442 | 0.01265 |
| Dach1    | 1.77315 | 0.00120 | Nap1l1   | 0.77118 | 0.04020 | Lzts3         | -1.16021 | 0.02475 |
| Lipa     | 1.77046 | 0.00005 | Al607873 | 0.76903 | 0.01535 | Hmcn2         | -1.16147 | 0.03175 |
| Snca     | 1.76750 | 0.00455 | Ube2g1   | 0.76722 | 0.02875 | Cd2           | -1.16153 | 0.03470 |
| Pramef8  | 1.76677 | 0.01135 | Efhd2    | 0.76645 | 0.02150 | Lrrc51        | -1.16643 | 0.01630 |
| Apobec3  | 1.76445 | 0.04255 | Nek7     | 0.76338 | 0.01655 | Sfxn4         | -1.16925 | 0.04505 |

|          |         |         |               |         |         |         |          |         |
|----------|---------|---------|---------------|---------|---------|---------|----------|---------|
| Rab19    | 1.74610 | 0.02180 | Xpr1          | 0.75928 | 0.02440 | Gfpt2   | -1.17058 | 0.00095 |
| Wdfy4    | 1.73843 | 0.00045 | Aldh3b1       | 0.75875 | 0.04450 | Ivd     | -1.17226 | 0.01130 |
| Ect2     | 1.73672 | 0.00135 | Samhd1        | 0.75826 | 0.01785 | Gcat    | -1.17279 | 0.02365 |
| Adam22   | 1.73653 | 0.00065 | Qk            | 0.75783 | 0.03335 | Fam132a | -1.17547 | 0.00155 |
| Grk4     | 1.73480 | 0.04650 | H2-K1         | 0.75740 | 0.03510 | Sertad1 | -1.17828 | 0.01720 |
| Slamf7   | 1.72961 | 0.00955 | Trim30a       | 0.75392 | 0.03590 | Pygl    | -1.17837 | 0.00025 |
| Gm14326  | 1.72091 | 0.00560 | Eif2ak2       | 0.75375 | 0.04350 | Nr4a2   | -1.17878 | 0.04115 |
| Rab8b    | 1.71582 | 0.00025 | Bgn           | 0.75330 | 0.01445 | Ccdc69  | -1.18001 | 0.00890 |
| Sh3bgrl2 | 1.71546 | 0.00110 | Gbp7          | 0.75308 | 0.03665 | Rgs3    | -1.18513 | 0.00095 |
| Asf1b    | 1.71506 | 0.01225 | Clu           | 0.75176 | 0.03980 | Ephb6   | -1.18999 | 0.04410 |
| Egr2     | 1.71340 | 0.00690 | Pla2g7        | 0.75076 | 0.02355 | Aacs    | -1.20005 | 0.00010 |
| Runx2    | 1.71174 | 0.03030 | Dock9         | 0.75056 | 0.04570 | Sept5   | -1.20039 | 0.00425 |
| Marveld2 | 1.70647 | 0.01300 | Cdc42ep3      | 0.75050 | 0.04100 | Tenc1   | -1.20240 | 0.00030 |
| Tc2n     | 1.70613 | 0.01625 | Stk10         | 0.74522 | 0.03195 | Zfp692  | -1.20457 | 0.02860 |
| Gpr65    | 1.69199 | 0.00110 | Serinc1       | 0.74426 | 0.02470 | B4galt1 | -1.20905 | 0.00010 |
| Arfgef1  | 1.68667 | 0.04920 | 2510009E07Rik | 0.74294 | 0.03805 | Stx1a   | -1.20911 | 0.04480 |
| Pik3cd   | 1.68140 | 0.01810 | Sh3bgrl3      | 0.74239 | 0.02565 | Ephx2   | -1.21004 | 0.00015 |
| Tlr6     | 1.67543 | 0.01440 | Vma21         | 0.74217 | 0.04230 | Spon2   | -1.21188 | 0.01400 |
| Slc9a4   | 1.67132 | 0.01215 | Hmgn5         | 0.73717 | 0.04535 | Slc20a2 | -1.21227 | 0.01690 |
| Zc3h12d  | 1.66965 | 0.01375 | Ptpn12        | 0.73640 | 0.04610 | Ring1   | -1.21891 | 0.00775 |
| C5ar2    | 1.66930 | 0.00365 | Atp6v1a       | 0.73480 | 0.01600 | Ddah2   | -1.22215 | 0.00365 |
| Tlr7     | 1.66754 | 0.00020 | Zbtb1         | 0.73476 | 0.04170 | Adam15  | -1.22249 | 0.00810 |
| Zfp69    | 1.66567 | 0.00840 | Eif5          | 0.73274 | 0.03780 | Rprml   | -1.22451 | 0.00320 |
| Fos      | 1.66548 | 0.00005 | Stk24         | 0.73250 | 0.02485 | Chrnbl  | -1.23351 | 0.00240 |
| H2-DMb1  | 1.66361 | 0.00025 | Csnk1g3       | 0.73083 | 0.03720 | Gys1    | -1.23624 | 0.00060 |
| Efr3b    | 1.66338 | 0.00140 | Gimap6        | 0.73052 | 0.03400 | Zfp598  | -1.23671 | 0.00020 |
| Nlrp3    | 1.66318 | 0.01270 | Nrp2          | 0.73015 | 0.03375 | C2cd2l  | -1.23944 | 0.00085 |
| Srgap1   | 1.66243 | 0.02725 | Arhgap5       | 0.73003 | 0.02880 | Thbd    | -1.24147 | 0.00010 |
| Flt3     | 1.66045 | 0.02785 | Serping1      | 0.72771 | 0.02325 | Lgals12 | -1.24247 | 0.00005 |
| Plekha6  | 1.65752 | 0.00040 | Tns3          | 0.72731 | 0.02830 | Clec3b  | -1.24263 | 0.00015 |
| Rgs18    | 1.65383 | 0.00470 | Top1          | 0.72302 | 0.02915 | Gsn     | -1.24317 | 0.02435 |
| Klh4     | 1.65289 | 0.00660 | Clock         | 0.72194 | 0.02515 | Map10   | -1.24421 | 0.04390 |
| Fam122b  | 1.65262 | 0.00090 | Tab2          | 0.71994 | 0.02675 | Clmn    | -1.24465 | 0.00305 |
| Figl1    | 1.64550 | 0.01230 | Daglb         | 0.71987 | 0.04560 | Tmem231 | -1.24610 | 0.01785 |
| Ulbp1    | 1.64471 | 0.02085 | Plau          | 0.71768 | 0.02710 | Lman2l  | -1.24703 | 0.00135 |
| Cdca3    | 1.64402 | 0.02130 | Tecr          | 0.71707 | 0.02345 | H2-Ke6  | -1.25006 | 0.04405 |
| Dnmt3l   | 1.63625 | 0.03470 | Sash1         | 0.71523 | 0.02200 | Acaca   | -1.25052 | 0.00020 |
| Kcnj2    | 1.63451 | 0.00460 | Myo10         | 0.71451 | 0.02880 | Ptprr   | -1.25220 | 0.03110 |
| Tacc3    | 1.63015 | 0.01240 | Myof          | 0.71395 | 0.02965 | Cd209f  | -1.25230 | 0.00190 |
| Acer3    | 1.62875 | 0.00010 | Serpina3n     | 0.71167 | 0.02705 | Gpr133  | -1.25271 | 0.00530 |
| P2ry10   | 1.62846 | 0.00600 | Map4k4        | 0.70878 | 0.04380 | Smoc1   | -1.25288 | 0.00005 |
| Soat1    | 1.62145 | 0.00020 | Ube3a         | 0.70125 | 0.03900 | Rfx2    | -1.25521 | 0.00605 |
| Birc5    | 1.62094 | 0.01250 | Mdm2          | 0.70114 | 0.04515 | Igfbp6  | -1.25722 | 0.00025 |
| Ncaph    | 1.62076 | 0.00230 | Osbp18        | 0.70041 | 0.02640 | Msln    | -1.26118 | 0.01555 |



|               |         |         |          |          |         |          |          |         |
|---------------|---------|---------|----------|----------|---------|----------|----------|---------|
| Ptchd1        | 1.62003 | 0.03555 | Krcc1    | 0.69983  | 0.03985 | Sh3glb2  | -1.26250 | 0.00155 |
| Tbx21         | 1.61725 | 0.03630 | Lyz2     | 0.69961  | 0.03965 | Ifi2712a | -1.26436 | 0.00605 |
| Arhgap19      | 1.61691 | 0.00020 | Tgfbr1   | 0.69889  | 0.03390 | Bhlhe40  | -1.27386 | 0.00080 |
| Hck           | 1.61040 | 0.00115 | Eltf1    | 0.69421  | 0.02900 | Lysmd2   | -1.28065 | 0.00465 |
| Anpep         | 1.60923 | 0.00005 | Cd9      | 0.69152  | 0.02940 | BC067074 | -1.28466 | 0.01215 |
| Kcnn4         | 1.60634 | 0.00155 | Tgfb1    | 0.68693  | 0.04020 | Kcne4    | -1.28494 | 0.01015 |
| Zfp455        | 1.60356 | 0.01550 | Ktn1     | 0.68191  | 0.04530 | Larp6    | -1.28871 | 0.04495 |
| Serpinb6b     | 1.60206 | 0.00045 | Txndc16  | 0.67886  | 0.04490 | Adamts4  | -1.28923 | 0.04740 |
| Slamf8        | 1.59503 | 0.00980 | Phf2011  | 0.67801  | 0.04810 | Cd209g   | -1.29059 | 0.00460 |
| Apbb2         | 1.58785 | 0.02535 | Pcm1     | 0.67472  | 0.04550 | Gabre    | -1.29105 | 0.00330 |
| Ptpn22        | 1.58479 | 0.01080 | Kpna3    | 0.67366  | 0.03600 | Ecm1     | -1.29111 | 0.00310 |
| Fyb           | 1.58211 | 0.00355 | Tmx3     | 0.67158  | 0.04315 | Ppara    | -1.29379 | 0.02505 |
| Pydc4         | 1.57995 | 0.03750 | Stom     | 0.65805  | 0.03710 | Arid5a   | -1.29414 | 0.01285 |
| Cd200r1       | 1.57825 | 0.04970 | Fcho2    | 0.65108  | 0.04190 | Gng7     | -1.29572 | 0.01110 |
| A530099J19Rik | 1.57635 | 0.02605 | Smpd13a  | 0.65105  | 0.03990 | Gpt2     | -1.29962 | 0.00005 |
| Brca2         | 1.57492 | 0.00605 | Rap1b    | 0.64062  | 0.04845 | Hk2      | -1.30280 | 0.02435 |
| Nat1          | 1.57467 | 0.03450 | Ablim3   | 0.62867  | 0.04785 | Tnxb     | -1.30390 | 0.00010 |
| Gm4951        | 1.57044 | 0.02580 | Atp13a3  | 0.62458  | 0.04740 | Mapk8ip1 | -1.30554 | 0.00670 |
| Trim36        | 1.56541 | 0.00870 | Wwtr1    | 0.61676  | 0.04350 | Tbx6     | -1.30821 | 0.04890 |
| C330027C09Rik | 1.56241 | 0.00985 | Nus1     | 0.60293  | 0.04460 | Prr5l    | -1.30916 | 0.00150 |
| Evi2a         | 1.56066 | 0.04865 | Nadk     | -0.60675 | 0.04235 | Agpat9   | -1.31078 | 0.00010 |
| Gm14412       | 1.56017 | 0.01905 | Tdrp     | -0.61665 | 0.04570 | Mall     | -1.31085 | 0.00380 |
| Gm20939       | 1.55658 | 0.04795 | Atp5c1   | -0.61902 | 0.03930 | Slc9b2   | -1.32508 | 0.03560 |
| Btk           | 1.54900 | 0.00130 | Lamb2    | -0.62310 | 0.04605 | Adamts13 | -1.32756 | 0.01275 |
| Nckap1l       | 1.54900 | 0.00005 | Ndrp1    | -0.62365 | 0.03805 | Per3     | -1.33714 | 0.01870 |
| Epb4.1l3      | 1.54594 | 0.00325 | Cox7a2   | -0.62497 | 0.04350 | Alad     | -1.33913 | 0.00040 |
| Gm8923        | 1.54496 | 0.03650 | Dgkd     | -0.62622 | 0.04845 | Echdc3   | -1.34019 | 0.00050 |
| Scoc          | 1.54488 | 0.00010 | Sh3pxd2a | -0.63368 | 0.04805 | Ccnl2    | -1.34245 | 0.00020 |
| Hbegf         | 1.54352 | 0.00815 | Mat2a    | -0.63452 | 0.03165 | Zfr2     | -1.34266 | 0.03800 |
| Ragap1        | 1.54097 | 0.02515 | Eif4a2   | -0.64114 | 0.04870 | Nrg4     | -1.34361 | 0.00090 |
| Cit           | 1.54092 | 0.00625 | Man2a2   | -0.64268 | 0.03830 | Slc13a3  | -1.34380 | 0.03560 |
| Zfp286        | 1.53920 | 0.04025 | Dlc1     | -0.64315 | 0.03460 | Gm9992   | -1.34444 | 0.04485 |
| Ppig          | 1.53556 | 0.02005 | Lims2    | -0.64527 | 0.03960 | BC068281 | -1.34854 | 0.03425 |
| Csf2rb2       | 1.53216 | 0.00045 | Insr     | -0.65251 | 0.02825 | Tmem216  | -1.35092 | 0.02205 |
| Cdk18         | 1.53159 | 0.00310 | Pgrmc1   | -0.65796 | 0.02605 | Niacr1   | -1.35639 | 0.00050 |
| Peg3          | 1.53080 | 0.00005 | U2af2    | -0.65848 | 0.04930 | Nov      | -1.36342 | 0.00280 |
| Samd9l        | 1.53049 | 0.00005 | Gas7     | -0.66286 | 0.03380 | Lgi4     | -1.36356 | 0.03425 |
| Ccnb2         | 1.53022 | 0.01100 | Prdx3    | -0.66359 | 0.03405 | Actr5    | -1.36376 | 0.01195 |
| Lpar3         | 1.53003 | 0.02820 | Etfb     | -0.66583 | 0.04200 | Lyve1    | -1.36411 | 0.00005 |
| Gmnn          | 1.52999 | 0.00470 | L3hypdh  | -0.66760 | 0.04765 | Hdc      | -1.36461 | 0.03245 |
| Cd28          | 1.52633 | 0.01815 | Uqcrc1   | -0.66830 | 0.03430 | Pacsin3  | -1.36721 | 0.03795 |
| Zdhhc21       | 1.52288 | 0.00180 | Ypel3    | -0.66863 | 0.04255 | Gpam     | -1.38408 | 0.00005 |
| Stmn1         | 1.52271 | 0.00040 | Elk4     | -0.67079 | 0.04770 | Hdac10   | -1.38521 | 0.00355 |
| Lpar5         | 1.51829 | 0.03435 | Hist1h1c | -0.67131 | 0.03995 | Sft2d3   | -1.38836 | 0.00480 |

|               |         |         |          |          |         |           |          |         |
|---------------|---------|---------|----------|----------|---------|-----------|----------|---------|
| Gm13157       | 1.51815 | 0.00135 | Aldh6a1  | -0.67210 | 0.03110 | Hspb8     | -1.39974 | 0.00005 |
| Thoc2         | 1.51100 | 0.00430 | Nr1h3    | -0.67323 | 0.04410 | Upp2      | -1.40009 | 0.01520 |
| Tyrobp        | 1.50983 | 0.00005 | Dtnbp1   | -0.67552 | 0.03090 | Acot2     | -1.40689 | 0.00315 |
| Tnfrsf26      | 1.50824 | 0.02900 | Kmt2d    | -0.67555 | 0.03085 | Sh2b2     | -1.40726 | 0.00015 |
| Cyp2r1        | 1.50528 | 0.01810 | Acvr1b   | -0.67614 | 0.04825 | Ppp1r1a   | -1.40853 | 0.00005 |
| Ms4a7         | 1.50506 | 0.00095 | Sod1     | -0.67760 | 0.02880 | Retn      | -1.41641 | 0.00010 |
| Krt222        | 1.49584 | 0.01875 | Mccc2    | -0.68369 | 0.03210 | Sdcbp2    | -1.41741 | 0.01100 |
| Cybb          | 1.49548 | 0.00005 | Clec2d   | -0.68603 | 0.03145 | Ppargc1b  | -1.42432 | 0.02145 |
| Adamts2       | 1.49330 | 0.01900 | Hmgn1    | -0.68791 | 0.03520 | Myrf      | -1.42471 | 0.00710 |
| Vangl2        | 1.49204 | 0.00630 | Rpl36    | -0.68890 | 0.02975 | Tnfrsf11b | -1.43625 | 0.01315 |
| Ncoa7         | 1.49139 | 0.00135 | Smurf1   | -0.69366 | 0.04570 | Pim3      | -1.44048 | 0.00010 |
| Pde7b         | 1.48353 | 0.00120 | Hyal2    | -0.69585 | 0.04630 | Ptges     | -1.44515 | 0.01145 |
| Smc2          | 1.48304 | 0.00175 | Nol6     | -0.69866 | 0.03255 | Nrbp2     | -1.44538 | 0.00005 |
| Bub1          | 1.48090 | 0.04790 | Bap1     | -0.70193 | 0.04055 | Gsta3     | -1.45406 | 0.00005 |
| Itgbl1        | 1.48073 | 0.00225 | Adcy5    | -0.70214 | 0.02885 | Uap1      | -1.46580 | 0.00005 |
| Nek2          | 1.47326 | 0.03785 | Pex14    | -0.70367 | 0.04130 | Pcsk6     | -1.47039 | 0.00015 |
| 2610305D13Rik | 1.47160 | 0.00110 | Ndufb7   | -0.70403 | 0.03020 | Dact2     | -1.47420 | 0.00615 |
| Inpp4b        | 1.47078 | 0.00735 | Rnps1    | -0.70649 | 0.04225 | Rpsa-ps10 | -1.47495 | 0.00105 |
| Galnt12       | 1.46805 | 0.04355 | Rgcc     | -0.70768 | 0.02580 | Krt19     | -1.48691 | 0.01345 |
| H2-Ob         | 1.46181 | 0.02095 | P4ha2    | -0.71132 | 0.04495 | Cyp2s1    | -1.48812 | 0.00410 |
| Gatm          | 1.46072 | 0.00240 | Ech1     | -0.71278 | 0.03015 | Car1      | -1.48855 | 0.01995 |
| Fam60a        | 1.45834 | 0.02240 | Marc2    | -0.71287 | 0.04150 | Adam33    | -1.49596 | 0.00720 |
| Fgd4          | 1.45730 | 0.00535 | Rnf187   | -0.71472 | 0.02320 | Trpv2     | -1.50010 | 0.00005 |
| Vcam1         | 1.45727 | 0.00010 | Nod1     | -0.71482 | 0.04360 | Tppp      | -1.50057 | 0.00005 |
| Naip2         | 1.45495 | 0.00395 | Scaf4    | -0.71752 | 0.04340 | Abca4     | -1.50097 | 0.02490 |
| Gpr35         | 1.45377 | 0.01610 | Tcta     | -0.71788 | 0.04430 | Nog       | -1.50255 | 0.00200 |
| Ammecr1       | 1.45247 | 0.00690 | Hibadh   | -0.71845 | 0.02140 | Plekha4   | -1.50678 | 0.00415 |
| Dzip3         | 1.44700 | 0.02310 | Elof1    | -0.71998 | 0.04610 | Mst1r     | -1.51103 | 0.00015 |
| Pramef12      | 1.44527 | 0.03210 | Slc25a28 | -0.72107 | 0.03775 | Ccl24     | -1.52303 | 0.00095 |
| Pmaip1        | 1.44492 | 0.02795 | Slc29a1  | -0.72124 | 0.03405 | P4htm     | -1.52633 | 0.01390 |
| Sncaip        | 1.44286 | 0.00360 | Slc25a44 | -0.72136 | 0.03220 | Abcg4     | -1.55475 | 0.01780 |
| Pde9a         | 1.44250 | 0.04550 | S100a13  | -0.72175 | 0.02825 | Chst1     | -1.56802 | 0.00005 |
| Rnf180        | 1.44129 | 0.04060 | Dvl1     | -0.72233 | 0.04670 | Serpina1a | -1.57207 | 0.01520 |
| H2-M9         | 1.43786 | 0.03840 | Uqcr10   | -0.72358 | 0.03050 | Pth1r     | -1.58311 | 0.00055 |
| Msr1          | 1.43703 | 0.00245 | Tmem242  | -0.72375 | 0.03410 | Rbp7      | -1.58910 | 0.00005 |
| Itgb2         | 1.43676 | 0.00005 | Eif3g    | -0.72438 | 0.03900 | Chst4     | -1.60155 | 0.02600 |
| Cnr2          | 1.43418 | 0.03100 | Pfkfb3   | -0.72496 | 0.03005 | St3gal4   | -1.60285 | 0.00105 |
| Adra1a        | 1.42960 | 0.00190 | Txnip    | -0.72599 | 0.04970 | Dtna      | -1.60342 | 0.03635 |
| Atrx          | 1.42885 | 0.00155 | Anxa3    | -0.72612 | 0.01600 | Efhf1     | -1.60886 | 0.00145 |
| Pik3c2b       | 1.42453 | 0.01675 | Glb1l2   | -0.72650 | 0.01670 | Amt       | -1.61554 | 0.02355 |
| D17H6S56E-5   | 1.41559 | 0.00070 | Ptms     | -0.72910 | 0.02660 | Al661453  | -1.62298 | 0.04975 |
| Slfn2         | 1.41465 | 0.00040 | Kctd21   | -0.72975 | 0.04995 | Atoh8     | -1.62489 | 0.00070 |
| Plek          | 1.41402 | 0.00260 | Csrp1    | -0.73148 | 0.02085 | Gm5617    | -1.63041 | 0.00080 |
| Vsig4         | 1.41084 | 0.00880 | Sun1     | -0.73166 | 0.02590 | Cldn1     | -1.63617 | 0.03880 |

|               |         |         |               |          |         |          |          |         |
|---------------|---------|---------|---------------|----------|---------|----------|----------|---------|
| Galnt6        | 1.40906 | 0.01115 | Mgst1         | -0.73389 | 0.03225 | Fign     | -1.63672 | 0.00905 |
| AI987944      | 1.40709 | 0.00745 | Amy1          | -0.73551 | 0.03145 | Tmem53   | -1.63825 | 0.00205 |
| Gp49a         | 1.40658 | 0.03645 | Unc119b       | -0.73569 | 0.04620 | Hs3st3b1 | -1.63830 | 0.03825 |
| Gm11710       | 1.40516 | 0.04255 | Tmem140       | -0.73570 | 0.04705 | Rin1     | -1.64645 | 0.01310 |
| B2m           | 1.40428 | 0.00310 | Zfp395        | -0.73598 | 0.03570 | Vegfa    | -1.66386 | 0.00245 |
| Prr11         | 1.40311 | 0.01690 | Timm50        | -0.73728 | 0.04570 | Ces1d    | -1.66916 | 0.00005 |
| Ift74         | 1.40277 | 0.00315 | Slit3         | -0.73912 | 0.01940 | Twist2   | -1.67176 | 0.00275 |
| Siglec1       | 1.39735 | 0.00040 | Smg5          | -0.73932 | 0.04120 | Il17re   | -1.67546 | 0.00220 |
| Rassf9        | 1.39021 | 0.02060 | Prkd2         | -0.73935 | 0.03855 | Ms4a8a   | -1.68035 | 0.01020 |
| Zdhhc2        | 1.38477 | 0.04785 | Serpine2      | -0.74090 | 0.02095 | Arg1     | -1.68100 | 0.03160 |
| Pik3r5        | 1.38245 | 0.00030 | Chd7          | -0.74211 | 0.04725 | Sctr     | -1.68257 | 0.00100 |
| Pde3a         | 1.38181 | 0.02065 | Acadvl        | -0.74368 | 0.02290 | Grik5    | -1.68332 | 0.00045 |
| Zfp946        | 1.38115 | 0.00280 | Mier3         | -0.74600 | 0.04875 | Nnat     | -1.69302 | 0.00020 |
| Tex9          | 1.37947 | 0.01510 | Atp1a2        | -0.74782 | 0.04000 | Celsr2   | -1.70061 | 0.00400 |
| Plk1          | 1.37826 | 0.04535 | Plat          | -0.74836 | 0.04385 | Rundc3b  | -1.70108 | 0.02110 |
| 5430435G22Rik | 1.37679 | 0.00035 | Rapgef1       | -0.74858 | 0.02605 | Dnase1l2 | -1.70290 | 0.03985 |
| Gucy1a3       | 1.37672 | 0.00030 | GlrX5         | -0.75027 | 0.02330 | Mogat1   | -1.70410 | 0.00160 |
| Dock2         | 1.37429 | 0.00035 | 2410015M20Rik | -0.75090 | 0.02605 | Arl4d    | -1.71278 | 0.00195 |
| Casp3         | 1.37324 | 0.00675 | Pts           | -0.75182 | 0.03200 | Ffar4    | -1.72656 | 0.00020 |
| Prcp          | 1.37129 | 0.00015 | Ephb4         | -0.75430 | 0.04205 | Gprc5a   | -1.73574 | 0.00625 |
| Fosb          | 1.36897 | 0.03395 | Snx33         | -0.75486 | 0.03795 | Hoxa7    | -1.73849 | 0.00940 |
| Basp1         | 1.36252 | 0.00095 | Mrps30        | -0.75655 | 0.02775 | Nr1d1    | -1.74163 | 0.00005 |
| Cd300a        | 1.35823 | 0.00030 | Tomm7         | -0.75752 | 0.02130 | Slc16a11 | -1.74429 | 0.01040 |
| Prkcb         | 1.35272 | 0.01825 | Letmd1        | -0.75835 | 0.03575 | Cish     | -1.77402 | 0.00045 |
| Hmga1         | 1.34889 | 0.00645 | Adhfe1        | -0.75845 | 0.02085 | Itgb3    | -1.78655 | 0.00075 |
| Sifn8         | 1.34635 | 0.00580 | Ndufb4        | -0.75888 | 0.03740 | Ephx4    | -1.78819 | 0.01500 |
| Tnfrsf13b     | 1.34282 | 0.01055 | Dab2ip        | -0.76064 | 0.01930 | Asphd2   | -1.79963 | 0.04020 |
| Iffit3        | 1.34081 | 0.00135 | Fdx1          | -0.76233 | 0.03120 | Xpnp2    | -1.80418 | 0.01105 |
| Cd300ld       | 1.33589 | 0.00035 | Txn2          | -0.76260 | 0.04640 | Efs      | -1.80803 | 0.00115 |
| Hmga1-rs1     | 1.33479 | 0.04315 | Rere          | -0.76265 | 0.01220 | Ifitm6   | -1.81458 | 0.00495 |
| Zfp62         | 1.33060 | 0.02265 | Nr1h2         | -0.76338 | 0.02540 | Dcst1    | -1.81868 | 0.00290 |
| Ntf3          | 1.32615 | 0.02675 | Per1          | -0.76422 | 0.02170 | Wnt10b   | -1.83229 | 0.01305 |
| Mgp           | 1.32265 | 0.00005 | Egln2         | -0.76449 | 0.02065 | Adig     | -1.83858 | 0.00005 |
| Ccdc109b      | 1.30857 | 0.01505 | Rnase4        | -0.76559 | 0.01570 | Hspa1a   | -1.83996 | 0.00215 |
| Clec4a3       | 1.30813 | 0.00235 | Zbed3         | -0.76617 | 0.04580 | Tppp3    | -1.84728 | 0.00005 |
| 2810474O19Rik | 1.30732 | 0.00015 | Fgf10         | -0.76811 | 0.02040 | Dhh      | -1.84787 | 0.02560 |
| 4930506M07Rik | 1.30437 | 0.00035 | Zyx           | -0.76874 | 0.01895 | Gjb5     | -1.85447 | 0.04185 |
| Gdpd1         | 1.30120 | 0.02365 | Use1          | -0.77054 | 0.04120 | Retnla   | -1.85523 | 0.00005 |
| Zfp758        | 1.30015 | 0.00950 | Grina         | -0.77416 | 0.02585 | Scg3     | -1.87481 | 0.00480 |
| Prc1          | 1.29946 | 0.02330 | Kdsr          | -0.77417 | 0.01390 | Matn4    | -1.90721 | 0.03790 |
| Egr1          | 1.29861 | 0.00315 | Abhd5         | -0.77469 | 0.02835 | Rhpn2    | -1.91570 | 0.02655 |
| Pdcd10        | 1.29835 | 0.00425 | Rplp1         | -0.77583 | 0.02195 | Rasl11b  | -1.92045 | 0.00005 |
| Cmpk1         | 1.29353 | 0.00540 | Ndufb10       | -0.77680 | 0.01415 | Gfra4    | -1.92340 | 0.00560 |
| Lpxn          | 1.28889 | 0.00585 | Fbl           | -0.77795 | 0.04340 | Smpd3    | -1.94546 | 0.02295 |

|               |         |         |           |          |         |               |          |         |
|---------------|---------|---------|-----------|----------|---------|---------------|----------|---------|
| Pak1          | 1.28878 | 0.01485 | Rnf121    | -0.78035 | 0.04125 | Gsta4         | -1.98706 | 0.00010 |
| Tec           | 1.28723 | 0.00365 | Mpst      | -0.78062 | 0.02680 | Slc6a4        | -1.99446 | 0.00400 |
| Pawr          | 1.28372 | 0.00240 | Bag4      | -0.78128 | 0.01865 | Gpr81         | -2.02815 | 0.00005 |
| Pyhin1        | 1.28085 | 0.01205 | Tom1l2    | -0.78362 | 0.02050 | Cgn           | -2.07197 | 0.00880 |
| Sp100         | 1.28012 | 0.00310 | Usp19     | -0.78390 | 0.01745 | Fam131b       | -2.07526 | 0.01330 |
| Iqgap2        | 1.27817 | 0.00025 | Slc7a10   | -0.78587 | 0.00970 | Lyz1          | -2.08863 | 0.00005 |
| Ifi44         | 1.27571 | 0.03190 | Imp3      | -0.78588 | 0.02975 | Nupr1l        | -2.12734 | 0.01105 |
| AW112010      | 1.27516 | 0.00835 | Cacfd1    | -0.78738 | 0.03350 | Prtn3         | -2.14597 | 0.03080 |
| G2e3          | 1.27047 | 0.02395 | Kcns3     | -0.78773 | 0.01490 | Pck1          | -2.15278 | 0.00005 |
| Smc4          | 1.27034 | 0.00065 | Ndufs2    | -0.78848 | 0.02260 | Slc38a3       | -2.16360 | 0.00070 |
| Pcdh17        | 1.26845 | 0.02505 | Taf8      | -0.79320 | 0.04765 | 4933406P04Rik | -2.19446 | 0.02330 |
| Plscr2        | 1.26702 | 0.00535 | Flcn      | -0.79340 | 0.02120 | Rasgrf1       | -2.19799 | 0.00140 |
| Lrrcc1        | 1.26411 | 0.00315 | Aco1      | -0.79386 | 0.00910 | Mfsd7c        | -2.20927 | 0.00810 |
| Ptprc         | 1.26119 | 0.00035 | Jund      | -0.79462 | 0.01645 | 1700001J03Rik | -2.22106 | 0.04935 |
| Phf21a        | 1.25956 | 0.03770 | Pex5      | -0.79473 | 0.04280 | Pthlh         | -2.23520 | 0.01495 |
| Runx1         | 1.25884 | 0.00570 | Zfand1    | -0.79508 | 0.04135 | Slc25a47      | -2.25810 | 0.00035 |
| Svep1         | 1.25688 | 0.00015 | D10Jhu81e | -0.79615 | 0.01265 | Pcsk4         | -2.26393 | 0.03805 |
| Samd4         | 1.25607 | 0.01320 | Enpp2     | -0.79677 | 0.01060 | Adrb3         | -2.28237 | 0.00005 |
| Haus3         | 1.25157 | 0.01875 | Zdhhc1    | -0.79798 | 0.02890 | Efcc1         | -2.28746 | 0.00315 |
| Tlr9          | 1.25147 | 0.02770 | Stc2      | -0.80016 | 0.01785 | Slc5a6        | -2.28963 | 0.01570 |
| Bora          | 1.24936 | 0.03760 | Mrpl9     | -0.80132 | 0.02000 | Ccdc30        | -2.29164 | 0.00645 |
| Eif5a2        | 1.24516 | 0.00335 | Fam43a    | -0.80155 | 0.02635 | Disp2         | -2.30021 | 0.00005 |
| Pcdh12        | 1.24454 | 0.01465 | Mrpl12    | -0.80191 | 0.02475 | Mfsd2a        | -2.30180 | 0.01555 |
| Oas1a         | 1.24381 | 0.01880 | Crls1     | -0.80254 | 0.02085 | Nat8l         | -2.31957 | 0.00005 |
| Lyn           | 1.23492 | 0.01800 | Ndufs6    | -0.80392 | 0.02850 | Dbp           | -2.34340 | 0.00660 |
| Tnfrsf11a     | 1.23406 | 0.00630 | Foxk1     | -0.80418 | 0.02305 | Islr2         | -2.36554 | 0.00065 |
| Cyr61         | 1.23386 | 0.00330 | Sema4b    | -0.80637 | 0.04820 | Fcna          | -2.43419 | 0.00105 |
| Ly86          | 1.23385 | 0.00290 | Cluh      | -0.81011 | 0.01140 | Kcp           | -2.44988 | 0.00030 |
| Ttc39a        | 1.23376 | 0.03860 | Zbtb46    | -0.81085 | 0.04975 | Barx2         | -2.55034 | 0.01100 |
| Rnaset2b      | 1.23255 | 0.00555 | Loxl1     | -0.81104 | 0.01215 | Hand2         | -2.69499 | 0.02520 |
| Foxp2         | 1.23135 | 0.00725 | Leng8     | -0.81224 | 0.01030 | Morn4         | -2.71190 | 0.00390 |
| Atp1a3        | 1.23091 | 0.00125 | Hsf1      | -0.81256 | 0.02345 | F2r1l         | -2.71372 | 0.00010 |
| Tlr3          | 1.22836 | 0.00255 | Myadm     | -0.81292 | 0.01015 | Gpr114        | -2.80714 | 0.00115 |
| Kcnh2         | 1.22691 | 0.01685 | Suox      | -0.81445 | 0.04420 | Lypd1         | -2.81594 | 0.04045 |
| Parp8         | 1.22355 | 0.00930 | H2afx     | -0.81723 | 0.04315 | Gm10419       | -2.85547 | 0.01240 |
| Msi2          | 1.22092 | 0.01060 | Osbpl11   | -0.81825 | 0.00800 | Hpx           | -2.86613 | 0.00005 |
| 0610010F05Rik | 1.21985 | 0.03250 | Ctdspl    | -0.82026 | 0.00650 | Cfd           | -2.93009 | 0.00145 |
| Sla           | 1.21912 | 0.00705 | Xpc       | -0.82215 | 0.02220 | Padi4         | -2.99671 | 0.04540 |
| Tmem132a      | 1.21811 | 0.03770 | Acp5      | -0.82222 | 0.01095 | Serpina1d     | -3.04324 | 0.00885 |
| Ms4a6d        | 1.21775 | 0.00205 | Acss3     | -0.82620 | 0.01035 | Gm129         | -3.04535 | 0.01025 |
| Ccdc55        | 1.21644 | 0.00185 | Ppan      | -0.82670 | 0.04410 | Asphd1        | -3.06839 | 0.04630 |
| Trim59        | 1.21463 | 0.04000 | Fitm2     | -0.83369 | 0.01515 | Cd163l1       | -3.23311 | 0.00150 |
| Tril          | 1.21038 | 0.00220 | Timm13    | -0.83481 | 0.02045 | Mamdc4        | -3.29111 | 0.02910 |
| Fnip2         | 1.20817 | 0.00335 | Ercc2     | -0.84175 | 0.03940 | Itih4         | -3.37199 | 0.00010 |

|           |         |         |          |          |         |           |          |         |
|-----------|---------|---------|----------|----------|---------|-----------|----------|---------|
| Gla       | 1.20745 | 0.00410 | Fbxo45   | -0.84192 | 0.00970 | Saa4      | -3.37429 | 0.02965 |
| Lgmn      | 1.20373 | 0.00070 | Ndufa3   | -0.84498 | 0.01995 | Hist1h4a  | -3.49612 | 0.01605 |
| Ldb2      | 1.20326 | 0.00990 | Fbxo21   | -0.84643 | 0.00860 | Smim5     | -3.60470 | 0.02505 |
| Gcnt1     | 1.20283 | 0.00575 | Ankrd16  | -0.84647 | 0.04905 | Gm14434   | -3.66428 | 0.01060 |
| Sdc3      | 1.19888 | 0.00185 | Rps6kb2  | -0.84749 | 0.03130 | Alb       | -4.04204 | 0.00005 |
| Nedd9     | 1.19767 | 0.00035 | Sdhb     | -0.84796 | 0.00895 | Apoc3     | -4.39925 | 0.00005 |
| Arhgap11a | 1.19763 | 0.00775 | Vgll4    | -0.84825 | 0.04805 | Apoh      | -4.46341 | 0.04060 |
| Efnb2     | 1.19443 | 0.02205 | Atp5j2   | -0.84922 | 0.01465 | Serpina1b | -4.49917 | 0.00030 |
| Plekhh2   | 1.18975 | 0.00165 | Sorbs3   | -0.85134 | 0.01250 | Nr1i3     | -4.86369 | 0.00935 |
| Ttpa      | 1.18282 | 0.01265 | Apba3    | -0.85158 | 0.02395 | Rgn       | -4.92201 | 0.03485 |
| Bub1b     | 1.18240 | 0.02110 | Dnajb1   | -0.85426 | 0.01615 | Cml2      | -4.97923 | 0.02650 |
| Capg      | 1.18199 | 0.00670 | Bcam     | -0.85454 | 0.03460 | Azgp1     | -5.06445 | 0.00515 |
| Pld3      | 1.18166 | 0.03825 | Klf4     | -0.85477 | 0.00695 | Plg       | -5.16141 | 0.01795 |
| Gm13152   | 1.17541 | 0.04615 | Il15ra   | -0.85479 | 0.03190 | Apoa1     | -5.27900 | 0.00005 |
| Phf6      | 1.17342 | 0.01605 | Adipor2  | -0.85494 | 0.00995 | Fgg       | -5.43087 | 0.00350 |
| Spaca1    | 1.16600 | 0.01730 | Tmem43   | -0.85558 | 0.00630 | Apoa2     | -5.43329 | 0.00005 |
| Btnl9     | 1.16442 | 0.00125 | Plin1    | -0.85564 | 0.02070 | Mup20     | -5.94374 | 0.00525 |
| Cd86      | 1.15979 | 0.03450 | Ddx27    | -0.85643 | 0.01175 | Ttr       | -6.45777 | 0.03925 |
| Il18rap   | 1.15576 | 0.04550 | Cxhc1    | -0.85756 | 0.01345 | Gc        | -6.48820 | 0.00170 |
| Mfsd12    | 1.15515 | 0.01380 | Tnks1bp1 | -0.85778 | 0.00795 | Mat1a     | -6.50783 | 0.04355 |
| Casp1     | 1.15367 | 0.00705 | Echs1    | -0.85796 | 0.01150 |           |          |         |
| Tmtc3     | 1.14819 | 0.00240 | Ttc38    | -0.85965 | 0.03785 |           |          |         |

**Supplementary Table 2 Clinical characteristics of NAFL/NASH patients and normal subjects.** NAFL and NASH patients were diagnosed by the FLIP algorithm.

| Variables                           | Normal           | NAFL            | NASH            | P-value | P-value§ |
|-------------------------------------|------------------|-----------------|-----------------|---------|----------|
| Sample size                         | 228              | 76              | 141             | -       | -        |
| Age (years)                         | 41.57±11.87      | 41.45±12.54     | 43.16±10.02     | -       | -        |
| Gender (male n, %)                  | 176 (77.2)       | 61 (80.3)       | 110 (78.0)      | -       | -        |
| BMI (kg/m <sup>2</sup> )            | 21.5 (20.1-22.9) | 26.0(24.0-28.2) | 26.6(24.7-29.1) | -       | -        |
| Systolic BP (mmHg)                  | 111.6±10.2       | 126.7±15.0      | 130.1±14.4      | <0.001  | <0.001   |
| Diastolic BP (mmHg)                 | 74.9±7.6         | 82.5±9.9        | 85.1±10.3       | <0.001  | <0.001   |
| Triglycerides (mmol/L) <sup>a</sup> | 0.88 (0.69-1.13) | 1.81(1.13-2.48) | 1.94(1.49-2.98) | <0.001  | <0.001   |
| Total cholesterol (mmol/L)          | 4.46±0.63        | 4.73±1.01       | 5.51±1.22       | <0.001  | <0.001   |
| LDL-c (mmol/L)                      | 2.49±0.53        | 2.75±0.78       | 3.17±0.97       | <0.01   | <0.01    |
| HDL-c (mmol/L)                      | 1.57±0.38        | 1.00±0.23       | 0.99±0.19       | <0.001  | <0.001   |
| FPG (mmol/L) <sup>a</sup>           | 4.7(4.4-5.0)     | 5.2(4.8-5.9)    | 5.3(4.9-6.2)    | <0.01   | <0.01    |
| HbA1c (%) <sup>a</sup>              | 5.3(5.0-5.4)     | 5.7(5.3-6.4)    | 5.9(5.5-6.7)    | <0.01   | <0.01    |
| HOMA-IR                             | 0.78 (0.6-1.03)  | 2.50(1.64-4.03) | 3.75(2.32-5.17) | <0.001  | <0.001   |
| ALT (U/L) <sup>a</sup>              | 14 (11-17)       | 44(27-72)       | 52(29-80)       | <0.001  | <0.001   |
| AST (U/L) <sup>a</sup>              | 19 (16-21)       | 31(24-40)       | 32(24-52)       | <0.01   | <0.01    |
| TBIL (µmol/L) <sup>a</sup>          | 12.3 (9.4-16.4)  | 13(11-18)       | 13(10-17)       | 0.21    | 0.39     |
| DBIL (µmol/L) <sup>a</sup>          | 2.6 (2.0-3.7)    | 5(4-7)          | 4(3-5)          | <0.01   | <0.01    |
| ALP (U/L) <sup>a</sup>              | 59.5 (49-72)     | 74(67-90)       | 84(68-95)       | <0.001  | <0.001   |
| GGT (U/L) <sup>a</sup>              | 14(10-21)        | 43(27-76)       | 55(37-97)       | <0.001  | <0.001   |
| Sparcl1 (ng/mL) <sup>a</sup>        | 622.58±109.97    | 624.56±102.54   | 859.11±203.29   | <0.001  | <0.001   |
| Hepatocellular Ballooning           | -                | 0.47±0.66       | 1.40±0.49       | -       | -        |
| Steatosis                           | -                | 1.74±0.68       | 1.87±0.79       | -       | -        |
| Lobular inflammation                | -                | 0.63±0.61       | 1.31±0.46       | -       | -        |

BMI=body mass index; BP=blood pressure; LDL-c=low density lipoprotein cholesterol; HDL-c=high density lipoprotein cholesterol; FPG=fasting plasma glucose; HbA1c= glycated hemoglobin; HOMA-IR=homeostasis model assessment of insulin resistance; ALT=alanine transaminase; AST=aspartate aminotransferase; TBIL=total bilirubin; DBIL=direct bilirubin; ALP=alkaline phosphatase; GGT=γ-

glutamyl transpeptidase;

Data are presented as the mean  $\pm$  SD or median (interquartile range).

<sup>a</sup>: Analysis performed on log-transformed data. §: adjusted for age, gender and BMI.

**Supplementary Table 3.** RNA-Seq analysis showed the dysregulated genes in the livers of chronic recombinant Sparcl1 protein or saline- treated mice (Sparcl1 versus Saline, Fold change > 1.5,  $P < 0.05$ ).

**1888 upregulated genes.**

| Gene name | log2 (fold change) | P value | Gene name | log2 (fold change) | P value | Gene name    | log2 (fold change) | P value |
|-----------|--------------------|---------|-----------|--------------------|---------|--------------|--------------------|---------|
| Ccl2      | 9.21942            | 0.04715 | Slc30a10  | 1.07214            | 0.00005 | Rgn          | 0.75320            | 0.00005 |
| Hspa1a    | 5.61582            | 0.00175 | Il1a      | 1.07154            | 0.00005 | C6           | 0.75306            | 0.00020 |
| Hsd3b5    | 5.45247            | 0.02145 | Wfdc17    | 1.07115            | 0.00005 | Smdt1        | 0.75228            | 0.00005 |
| Tnfaip3   | 5.35473            | 0.00005 | Pea15a    | 1.06879            | 0.00005 | Vnn3         | 0.75170            | 0.00005 |
| Derl3     | 4.65708            | 0.00005 | Acyp2     | 1.06773            | 0.04495 | Cbr1         | 0.75150            | 0.00005 |
| Dzank1    | 4.24225            | 0.01780 | Morf4l2   | 1.06767            | 0.00005 | Afm          | 0.75085            | 0.00005 |
| Slc22a28  | 4.16053            | 0.00025 | Rtn4ip1   | 1.06758            | 0.00005 | St3gal1      | 0.75047            | 0.00005 |
| Cxcl5     | 4.09247            | 0.00010 | Fam107b   | 1.06704            | 0.00035 | Depdc7       | 0.74985            | 0.00005 |
| Cxcl2     | 3.96879            | 0.00055 | Hnrnpc    | 1.06623            | 0.00005 | Mettl7b      | 0.74974            | 0.00010 |
| Cxcl10    | 3.93775            | 0.00005 | Lrrc25    | 1.06266            | 0.00140 | Adprh        | 0.74972            | 0.00705 |
| Idi1      | 3.82554            | 0.00005 | Ubfd1     | 1.06218            | 0.00025 | Cpsf3l       | 0.74936            | 0.00740 |
| Car3      | 3.81879            | 0.00005 | Ubxn4     | 1.06153            | 0.00005 | Vwa9         | 0.74896            | 0.00210 |
| Cxcl1     | 3.78056            | 0.00005 | Morn2     | 1.06104            | 0.03025 | Ube2l6       | 0.74849            | 0.00005 |
| Gbp10     | 3.71001            | 0.00005 | Fabp2     | 1.05944            | 0.00005 | Psm1         | 0.74835            | 0.00005 |
| Pcsk9     | 3.65200            | 0.00005 | Pm20d2    | 1.05915            | 0.04095 | Sh3glb2      | 0.74762            | 0.00095 |
| Hspb1     | 3.57806            | 0.00005 | Wdsub1    | 1.05906            | 0.00580 | Alkbh6       | 0.74762            | 0.00350 |
| Cyp2c69   | 3.54545            | 0.00005 | Sreb2     | 1.05727            | 0.00005 | Uqc2         | 0.74643            | 0.00050 |
| Fdps      | 3.54366            | 0.00005 | Rnf186    | 1.05551            | 0.02380 | Pus7         | 0.74600            | 0.00870 |
| Cyp2c55   | 3.54057            | 0.00005 | Fez2      | 1.05326            | 0.00005 | Dpagt1       | 0.74562            | 0.00010 |
| Gstp2     | 3.40491            | 0.01790 | Ufm1      | 1.05324            | 0.00320 | Tubgcp4      | 0.74550            | 0.01565 |
| Gstm3     | 3.32073            | 0.00005 | Rhbg      | 1.05288            | 0.00025 | Sh3bgrl2     | 0.74549            | 0.00005 |
| Tlr2      | 3.31687            | 0.00005 | Bicd2     | 1.05277            | 0.00005 | Stx4a        | 0.74501            | 0.00230 |
| Sdf2l1    | 3.29016            | 0.00005 | Dhx37     | 1.05266            | 0.00005 | Gm9923       | 0.74486            | 0.03290 |
| Sqle      | 3.22842            | 0.00005 | Spry4     | 1.05151            | 0.00025 | 1700024P16Ri |                    |         |
| Creld2    | 3.15544            | 0.00005 | Dak       | 1.05141            | 0.00005 | k            | 0.74425            | 0.00055 |
| Aacs      | 3.14081            | 0.00005 | Opa3      | 1.04749            | 0.00005 | Rbm8a        | 0.74418            | 0.00005 |
| Hmgcs1    | 3.13446            | 0.00005 | Lgr5      | 1.04570            | 0.00855 | Bcl7b        | 0.74372            | 0.00930 |
| Slfn4     | 3.10084            | 0.00005 | Focad     | 1.04488            | 0.01190 | Gm6563       | 0.74343            | 0.00020 |
| Elovl6    | 3.06089            | 0.00005 | Prex1     | 1.04441            | 0.00425 | Tstd2        | 0.74321            | 0.01450 |
| Tubb2b    | 3.00153            | 0.00045 | Tmem39a   | 1.04426            | 0.00295 | Dpp9         | 0.74309            | 0.00005 |
| Cml5      | 2.99831            | 0.00005 | Slc36a1   | 1.04379            | 0.00005 | Mrps14       | 0.74199            | 0.00065 |
| Cyp51     | 2.92389            | 0.00005 | Pde12     | 1.04034            | 0.02900 | Nop58        | 0.74193            | 0.00005 |
| Ifitm5    | 2.91339            | 0.01055 | Ero1lb    | 1.04028            | 0.00005 | Frrs1        | 0.74157            | 0.00090 |
| Cys1      | 2.90685            | 0.00340 | Mbd1      | 1.03966            | 0.00005 | Zbtb18       | 0.74154            | 0.00005 |
|           |                    |         |           |                    |         | Pwp2         | 0.74133            | 0.00075 |



|           |         |         |               |         |         |          |         |         |
|-----------|---------|---------|---------------|---------|---------|----------|---------|---------|
| Cyp26a1   | 2.86784 | 0.00005 | Mob3a         | 1.03956 | 0.00100 | Pgp      | 0.74109 | 0.00210 |
| Cyp2c40   | 2.85543 | 0.00005 | Pklr          | 1.03873 | 0.00005 | Atxn711  | 0.74072 | 0.01820 |
| Park2     | 2.83604 | 0.04155 | Ifit3         | 1.03843 | 0.00020 | Ap2a2    | 0.74063 | 0.00005 |
| Slc22a30  | 2.83435 | 0.00005 | Stat2         | 1.03795 | 0.00005 | Tmem214  | 0.74050 | 0.00035 |
| Sc4mol    | 2.81913 | 0.00005 | Gstm2         | 1.03699 | 0.00005 | Sel1l    | 0.74040 | 0.00005 |
| Clec4d    | 2.81605 | 0.04755 | Elp6          | 1.03675 | 0.00150 | Slc50a1  | 0.74033 | 0.00950 |
| Ppp1r42   | 2.81130 | 0.02640 | Sarnp         | 1.03635 | 0.00190 | Amd1     | 0.74016 | 0.00005 |
| Fam47e    | 2.81076 | 0.00005 | Cep85         | 1.03603 | 0.00065 | Tmem143  | 0.74009 | 0.01875 |
| Ier3      | 2.81051 | 0.00005 | Trappc9       | 1.03590 | 0.00075 | Zfp710   | 0.73999 | 0.00085 |
| Afp       | 2.80786 | 0.00260 | Mal2          | 1.03526 | 0.00005 | Tmem70   | 0.73998 | 0.00005 |
| Gck       | 2.80181 | 0.00370 | Setd4         | 1.03496 | 0.00340 | Usp5     | 0.73987 | 0.00005 |
| Serpina3f | 2.78965 | 0.00005 | Lmbrd2        | 1.03480 | 0.00005 | Dck      | 0.73981 | 0.01365 |
| Cyp2a4    | 2.78965 | 0.00005 | Gemin8        | 1.03451 | 0.04315 | Dhx16    | 0.73968 | 0.00360 |
| Gale      | 2.75453 | 0.00005 | Lad1          | 1.03395 | 0.00200 | Asb13    | 0.73946 | 0.00005 |
| Bach2     | 2.74470 | 0.00005 | Gls           | 1.03356 | 0.01470 | Mpp1     | 0.73825 | 0.00340 |
| Ces2c     | 2.72141 | 0.00020 | BC031181      | 1.03296 | 0.00685 | Gpr39    | 0.73774 | 0.00395 |
| Gbp6      | 2.66408 | 0.00005 | Pctp          | 1.03225 | 0.00005 | Iars     | 0.73760 | 0.00025 |
| Keg1      | 2.63598 | 0.00005 | Acad12        | 1.03019 | 0.00275 | Psm10    | 0.73740 | 0.00110 |
| Niacr1    | 2.58025 | 0.00025 | Lnp           | 1.02937 | 0.00950 | Ecsit    | 0.73737 | 0.00020 |
| Thrsp     | 2.57716 | 0.00005 | Ifit172       | 1.02919 | 0.00005 | Mpv17    | 0.73721 | 0.01135 |
| Atp4a     | 2.55955 | 0.00095 | Aspa          | 1.02881 | 0.00015 | Rad23b   | 0.73685 | 0.00185 |
| Gm5828    | 2.53607 | 0.00690 | Leap2         | 1.02867 | 0.00005 | Necab1   | 0.73645 | 0.00010 |
| Zfp566    | 2.52241 | 0.03865 | Mphosph6      | 1.02855 | 0.00420 | Ascc2    | 0.73637 | 0.00030 |
| Nucb2     | 2.49658 | 0.00005 | Lyz2          | 1.02829 | 0.00005 | BC021614 | 0.73582 | 0.00545 |
| Gsta4     | 2.49204 | 0.00005 | Actn1         | 1.02761 | 0.00005 | Gramd1c  | 0.73582 | 0.00005 |
| Hsp90aa1  | 2.44373 | 0.00005 | Dalrd3        | 1.02704 | 0.00005 | Nacc1    | 0.73493 | 0.01135 |
| Fasn      | 2.44052 | 0.00005 | Ddx55         | 1.02575 | 0.00115 | Cyp2c68  | 0.73493 | 0.00005 |
| Mest      | 2.41460 | 0.00125 | Erp29         | 1.02521 | 0.00025 | Pnkd     | 0.73488 | 0.00640 |
| Kbtbd8    | 2.41391 | 0.00005 | Med24         | 1.02426 | 0.00360 | Xrcc5    | 0.73485 | 0.00020 |
| Tubb2a    | 2.41004 | 0.00005 | Dopey2        | 1.02409 | 0.00005 | Rps19bp1 | 0.73464 | 0.00165 |
| Srd5a1    | 2.39871 | 0.00005 | Coa3          | 1.02283 | 0.00015 | Anxa3    | 0.73444 | 0.01090 |
| Hspa1b    | 2.39693 | 0.00005 | 2810006K23Rik | 1.02247 | 0.00005 | Ddo      | 0.73442 | 0.00155 |
| Ttll3     | 2.39435 | 0.00950 | Polr2i        | 1.02225 | 0.00055 | Gm5786   | 0.73425 | 0.03855 |
| Ccdc111   | 2.39050 | 0.00650 | Gadd45gip1    | 1.02172 | 0.00200 | Comt     | 0.73408 | 0.00045 |
| Steap4    | 2.38391 | 0.00005 | Gpd2          | 1.02145 | 0.00005 | Rptor    | 0.73377 | 0.00015 |
| Sreb1     | 2.38303 | 0.00005 | Pnrc1         | 1.02123 | 0.00005 | Tarbp2   | 0.73366 | 0.00075 |
| Hyou1     | 2.38262 | 0.00005 | Ttll1         | 1.01952 | 0.01865 | Ptgr2    | 0.73330 | 0.00030 |
| Pfkfb3    | 2.38054 | 0.00005 | Eid1          | 1.01735 | 0.00005 | Atp5g1   | 0.73308 | 0.00010 |
| Spsb4     | 2.36652 | 0.00015 | Anks4b        | 1.01719 | 0.00005 | Zfp335   | 0.73307 | 0.02250 |
| Mid1ip1   | 2.36330 | 0.00005 | Sc5d          | 1.01711 | 0.00005 | Senp7    | 0.73267 | 0.03310 |
| Nsdhl     | 2.35933 | 0.00005 | Tcf21         | 1.01709 | 0.01960 | Capza1   | 0.73184 | 0.00160 |
| Nans      | 2.32732 | 0.00005 | Mup14         | 1.01506 | 0.00005 | Psmg1    | 0.73179 | 0.00035 |
| Pdia6     | 2.32611 | 0.00005 | Onecut2       | 1.01498 | 0.00005 | Denr     | 0.73175 | 0.00605 |
| Nudt7     | 2.31500 | 0.00005 | Tfpi2         | 1.01453 | 0.00090 | Gbp2     | 0.73108 | 0.01460 |

|          |         |         |         |         |         |                   |         |         |
|----------|---------|---------|---------|---------|---------|-------------------|---------|---------|
| Manf     | 2.29327 | 0.00005 | Sec11c  | 1.01382 | 0.00005 | Zmym6             | 0.73076 | 0.04630 |
| Nrep     | 2.28426 | 0.00005 | Copg1   | 1.01361 | 0.00005 | Pkp4              | 0.73069 | 0.00725 |
| Aqp8     | 2.27082 | 0.00005 | Trappc4 | 1.01360 | 0.00005 | Dis3              | 0.73066 | 0.02235 |
| Fblim1   | 2.26528 | 0.00010 | Ier5    | 1.01303 | 0.00005 | Smim11            | 0.73058 | 0.00340 |
| Inhba    | 2.26147 | 0.00005 | Neur13  | 1.01233 | 0.00025 | Fam65b            | 0.72998 | 0.03865 |
| Hsd3b3   | 2.25043 | 0.00005 | Tpm4    | 1.00774 | 0.00005 | Pex13             | 0.72990 | 0.03620 |
| Fkbp4    | 2.23271 | 0.00005 | Fas     | 1.00710 | 0.01240 | Ces1e             | 0.72986 | 0.00005 |
| Cyp4f14  | 2.22810 | 0.00005 | Mogs    | 1.00690 | 0.00005 | Slc35d2           | 0.72977 | 0.00005 |
| Serpina7 | 2.22498 | 0.00005 | Tram1   | 1.00674 | 0.00005 | Alg2              | 0.72880 | 0.00080 |
| Tmem14a  | 2.22103 | 0.00015 | Ralb    | 1.00647 | 0.00010 | Aarsd1            | 0.72848 | 0.00545 |
| Mroh6    | 2.21928 | 0.00225 | Fam149a | 1.00516 | 0.00005 | Cs                | 0.72846 | 0.00005 |
| Atp2b2   | 2.21694 | 0.00005 | Stxbp4  | 1.00430 | 0.01940 | Hemk1             | 0.72805 | 0.00630 |
| Ms4a4c   | 2.21378 | 0.00765 | Pik3ap1 | 1.00353 | 0.00005 | Fpr1              | 0.72771 | 0.00435 |
| Cyp4a12a | 2.20923 | 0.00005 | Gtf2f1  | 1.00347 | 0.00005 | Socs5             | 0.72768 | 0.00505 |
| Hsph1    | 2.19618 | 0.00005 | Hsd17b7 | 1.00316 | 0.00005 | Lipa              | 0.72763 | 0.00005 |
| Prdm10   | 2.19295 | 0.00005 | Erp44   | 1.00274 | 0.00005 | Mbl2              | 0.72753 | 0.00005 |
| Hsp90b1  | 2.17297 | 0.00005 | Dusp19  | 1.00117 | 0.00845 | Mrpl21            | 0.72746 | 0.00095 |
| Nid2     | 2.17126 | 0.03290 | Ccrn4l  | 1.00111 | 0.00005 | AI597468          | 0.72724 | 0.03100 |
| Insig1   | 2.16286 | 0.00005 | Aars    | 1.00105 | 0.00005 | Sept7             | 0.72650 | 0.00005 |
| Gmids    | 2.15441 | 0.00045 | Ifft1   | 1.00060 | 0.00005 | Slc16a12          | 0.72633 | 0.00005 |
| Zfp692   | 2.15331 | 0.00005 | Marco   | 1.00013 | 0.00005 | Eif2s1            | 0.72572 | 0.00005 |
| Adh6-ps1 | 2.13467 | 0.00005 | Slc22a1 | 1.00003 | 0.00005 | Snrpd2            | 0.72550 | 0.00020 |
| Slc17a3  | 2.13194 | 0.00005 | Cdh1    | 0.99996 | 0.00005 | Ndufa11           | 0.72487 | 0.00005 |
| Tubb4b   | 2.12844 | 0.00005 | Gtf3c6  | 0.99886 | 0.00005 | Hbb-bs            | 0.72475 | 0.00040 |
| Srsf7    | 2.12241 | 0.00005 | Golt1b  | 0.99863 | 0.01350 | Neur14            | 0.72467 | 0.02965 |
| Fdft1    | 2.11269 | 0.00650 | Gm7694  | 0.99635 | 0.00005 | Comm7             | 0.72462 | 0.00220 |
| Col27a1  | 2.10842 | 0.04730 | Heatr6  | 0.99630 | 0.01150 | Ppp1r11           | 0.72364 | 0.00550 |
| Pdia4    | 2.10818 | 0.00005 | Zfp428  | 0.99470 | 0.04145 | 2700089E24Ri<br>k | 0.72335 | 0.00005 |
| Apoa4    | 2.09964 | 0.00005 | Ndufaf7 | 0.99371 | 0.00005 | S100a9            | 0.72287 | 0.00025 |
| Slc39a10 | 2.09766 | 0.00005 | Skp2    | 0.99366 | 0.01005 | Map4              | 0.72276 | 0.01420 |
| Fkbp11   | 2.09365 | 0.00005 | Fmo5    | 0.99349 | 0.00005 | Preb              | 0.72270 | 0.00190 |
| Nipa1    | 2.08968 | 0.01365 | Zfp809  | 0.99192 | 0.00995 | Wdr41             | 0.72256 | 0.00055 |
| Stip1    | 2.08227 | 0.00005 | Tfe3    | 0.99190 | 0.00005 | Ippk              | 0.72250 | 0.01500 |
| Mvk      | 2.07748 | 0.00005 | Ppib    | 0.99173 | 0.00005 | Strip1            | 0.72240 | 0.00140 |
| Tdrkh    | 2.07304 | 0.00085 | Pdxk    | 0.99103 | 0.00005 | Elavl1            | 0.72236 | 0.00005 |
| Syvn1    | 2.06462 | 0.02640 | Myef2   | 0.99019 | 0.00030 | Pomt1             | 0.72136 | 0.03230 |
| Hes6     | 2.06224 | 0.00005 | Mmp9    | 0.98919 | 0.02905 | Ccnc              | 0.72130 | 0.02515 |
| Ccnd1    | 2.05750 | 0.00020 | Tmem37  | 0.98886 | 0.00005 | Gtf2h4            | 0.72114 | 0.00730 |
| Stard4   | 2.05336 | 0.00005 | Saa4    | 0.98881 | 0.00005 | Pdhx              | 0.72089 | 0.00650 |
| Gadd45a  | 2.05245 | 0.00010 | Gstm1   | 0.98796 | 0.00005 | Sugp2             | 0.72042 | 0.02815 |
| Gm6484   | 2.04445 | 0.00005 | Echdc1  | 0.98792 | 0.00115 | Mrpl34            | 0.71995 | 0.00025 |
| Tuba1a   | 2.04425 | 0.00025 | Fam89a  | 0.98745 | 0.01145 | Chst13            | 0.71993 | 0.00785 |
| Pdia3    | 2.03670 | 0.00005 | Ptprc   | 0.98716 | 0.00005 | Rhob              | 0.71972 | 0.00010 |

|               |         |         |          |         |         |         |         |         |
|---------------|---------|---------|----------|---------|---------|---------|---------|---------|
| Clec2h        | 2.03544 | 0.00020 | Mup6     | 0.98706 | 0.00010 | Gspt1   | 0.71966 | 0.00285 |
| Car1          | 2.02985 | 0.00190 | Rccd1    | 0.98622 | 0.03255 | Lsm12   | 0.71957 | 0.00025 |
| Icos          | 2.02594 | 0.03415 | Ppil1    | 0.98618 | 0.00025 | Csf2ra  | 0.71941 | 0.03485 |
| Asb2          | 2.02198 | 0.00585 | Siglece  | 0.98613 | 0.00070 | Cwc27   | 0.71890 | 0.02930 |
| Ces1f         | 2.01967 | 0.00005 | B3galnt2 | 0.98469 | 0.00075 | Asph    | 0.71887 | 0.00015 |
| Pdilt         | 2.01906 | 0.00005 | Mettl16  | 0.98450 | 0.00980 | Ywhah   | 0.71874 | 0.00255 |
| Lss           | 2.01565 | 0.00005 | Spata22  | 0.98282 | 0.00805 | Rheb    | 0.71698 | 0.00060 |
| Tgfb1i1       | 2.00364 | 0.00005 | Ints6    | 0.98249 | 0.00005 | Pebp1   | 0.71693 | 0.00005 |
| Egln3         | 2.00254 | 0.00005 | Snx3     | 0.98085 | 0.00005 | Dpy30   | 0.71693 | 0.00070 |
| Gm14322       | 1.99428 | 0.00460 | Atp7a    | 0.97945 | 0.00330 | Ube2n   | 0.71686 | 0.00005 |
| Dusp6         | 1.99169 | 0.00005 | Ficd     | 0.97859 | 0.00005 | Rab1b   | 0.71634 | 0.00005 |
| Pglyrp1       | 1.99158 | 0.02740 | Lect2    | 0.97750 | 0.00005 | Ralbp1  | 0.71633 | 0.00005 |
| Rd3           | 1.98632 | 0.01775 | Maged1   | 0.97716 | 0.00005 | Tff3    | 0.71607 | 0.00540 |
| Adh4          | 1.97580 | 0.00005 | Sgms1    | 0.97656 | 0.00015 | B4galt1 | 0.71600 | 0.00005 |
| Odc1          | 1.97066 | 0.00005 | Scfd1    | 0.97593 | 0.00005 | Cog6    | 0.71584 | 0.00010 |
| Olfir1033     | 1.96917 | 0.00005 | Dapk3    | 0.97527 | 0.00005 | Bin1    | 0.71579 | 0.00260 |
| Tuba1c        | 1.96231 | 0.00005 | Rap2a    | 0.97514 | 0.00005 | Nmi     | 0.71571 | 0.00115 |
| Adra1b        | 1.96006 | 0.00005 | Kpna4    | 0.97433 | 0.00005 | Dna2    | 0.71562 | 0.02745 |
| 9130409I23Rik | 1.95721 | 0.00005 | Tssc1    | 0.97383 | 0.00055 | Vcp     | 0.71518 | 0.00005 |
| Nfkbia        | 1.94990 | 0.00005 | Snupn    | 0.97360 | 0.00055 | Srgap2  | 0.71515 | 0.00060 |
| Rcan1         | 1.94743 | 0.00005 | Kdelc2   | 0.97237 | 0.00030 | Ptov1   | 0.71515 | 0.00120 |
| Loxl4         | 1.94583 | 0.00005 | Mcfcd2   | 0.97234 | 0.00005 | Alcam   | 0.71496 | 0.00255 |
| Esm1          | 1.94017 | 0.00120 | Cstf2    | 0.97148 | 0.00005 | Katna1  | 0.71477 | 0.00095 |
| Gpr98         | 1.91007 | 0.01200 | Wdr13    | 0.97128 | 0.00080 | Pawr    | 0.71461 | 0.00205 |
| Adh1          | 1.89560 | 0.00005 | Isy1     | 0.96977 | 0.00005 | Psmb2   | 0.71397 | 0.00005 |
| Rnd3          | 1.89517 | 0.00005 | Ccdc134  | 0.96976 | 0.00125 | Nudc    | 0.71379 | 0.00040 |
| Ngfr          | 1.88948 | 0.00005 | Lrrc59   | 0.96851 | 0.00005 | Rbmxl1  | 0.71378 | 0.00060 |
| Selenbp2      | 1.88942 | 0.00005 | Neil1    | 0.96822 | 0.02105 | Ckb     | 0.71336 | 0.01750 |
| Tubb4b-ps1    | 1.88772 | 0.00035 | Tmem173  | 0.96587 | 0.00275 | Zfp143  | 0.71254 | 0.00780 |
| Cd4           | 1.87888 | 0.04205 | Fam102a  | 0.96483 | 0.00005 | Gsr     | 0.71204 | 0.00005 |
| Hspa5         | 1.87709 | 0.00005 | Mettl1   | 0.96473 | 0.00010 | Mrto4   | 0.71140 | 0.00125 |
| Slco1a1       | 1.87549 | 0.00005 | Epb4.1i3 | 0.96455 | 0.00725 | Uhrf2   | 0.71101 | 0.00250 |
| Ralgps1       | 1.87125 | 0.00020 | Tbc1d25  | 0.96441 | 0.00415 | Lsg1    | 0.71064 | 0.01805 |
| Pter          | 1.86876 | 0.00005 | Creml    | 0.96428 | 0.00005 | Rasip1  | 0.71051 | 0.01170 |
| Hist1h2bk     | 1.86674 | 0.00970 | Oasl1    | 0.96424 | 0.00075 | Ccdc157 | 0.70868 | 0.01020 |
| Jun           | 1.86127 | 0.00005 | Ssr2     | 0.96305 | 0.00005 | Med31   | 0.70855 | 0.02485 |
| Cacybp        | 1.86023 | 0.00005 | Tdrd7    | 0.96293 | 0.00005 | Alkbh7  | 0.70848 | 0.00340 |
| Asprv1        | 1.85903 | 0.00935 | Rfx1     | 0.96241 | 0.00110 | Ndufaf3 | 0.70833 | 0.00220 |
| Dpy19l3       | 1.85775 | 0.00010 | Efnb2    | 0.96173 | 0.01530 | Smyd2   | 0.70827 | 0.00390 |
| Dhcr7         | 1.85441 | 0.00005 | Npl      | 0.96042 | 0.04675 | Ak2     | 0.70807 | 0.00005 |
| Calr          | 1.84541 | 0.00005 | Mrpl1    | 0.95798 | 0.00005 | Hmgn1   | 0.70787 | 0.00010 |
| Ugt2b1        | 1.84354 | 0.00005 | Nr1h3    | 0.95777 | 0.00005 | Txnrd1  | 0.70610 | 0.00005 |
| P4ha1         | 1.84293 | 0.00005 | Akr1c19  | 0.95709 | 0.00005 | Ccdc162 | 0.70500 | 0.03845 |
| Tuba1b        | 1.84139 | 0.00005 | Mesdc1   | 0.95648 | 0.00075 | Nsun2   | 0.70453 | 0.00215 |

|                   |         |         |         |         |         |                   |         |         |
|-------------------|---------|---------|---------|---------|---------|-------------------|---------|---------|
| Marcks1           | 1.83598 | 0.00005 | Dab2    | 0.95632 | 0.00015 | Mrpl53            | 0.70425 | 0.00020 |
| Mylpf             | 1.82492 | 0.04085 | Ndufaf6 | 0.95580 | 0.00100 | Kank2             | 0.70372 | 0.00080 |
| Cyp2c29           | 1.82484 | 0.00005 | Tfg     | 0.95518 | 0.00015 | Itpk1             | 0.70300 | 0.02110 |
| Hmgcr             | 1.82366 | 0.00005 | Vars    | 0.95509 | 0.00245 | Mfsd8             | 0.70272 | 0.01435 |
| Chordc1           | 1.82103 | 0.00005 | Prss36  | 0.95508 | 0.01300 | Nbn               | 0.70207 | 0.00065 |
| Tes               | 1.82093 | 0.00010 | Inip    | 0.95492 | 0.00585 | Acot4             | 0.70156 | 0.00195 |
| Hn1l              | 1.81749 | 0.00005 | Apold1  | 0.95415 | 0.01905 | Lactb2            | 0.70121 | 0.00055 |
| Icam1             | 1.80586 | 0.00005 | Fastkd5 | 0.95290 | 0.00405 | Rarb              | 0.70111 | 0.03830 |
| Sept11            | 1.80155 | 0.00005 | Dusp12  | 0.95210 | 0.00105 | 2610034B18Ri<br>k | 0.70109 | 0.00530 |
| Tifa              | 1.79093 | 0.00005 | Sh2b2   | 0.95002 | 0.02035 | Shmt2             | 0.70088 | 0.00005 |
| Dnajb1            | 1.77667 | 0.00005 | Snrpd1  | 0.94940 | 0.00005 | Fam188a           | 0.70065 | 0.01200 |
| Aldh1a7           | 1.77533 | 0.00005 | Pdhb    | 0.94910 | 0.00005 | Hspa13            | 0.70049 | 0.00005 |
| Tuba4a            | 1.76968 | 0.00005 | Ssr1    | 0.94858 | 0.00005 | Txn1              | 0.70020 | 0.00005 |
| Mmab              | 1.76752 | 0.00005 | Gm6793  | 0.94846 | 0.00005 | Phf6              | 0.70014 | 0.00865 |
| Ints1             | 1.76091 | 0.02155 | Ugdh    | 0.94801 | 0.00005 | Tssc4             | 0.70001 | 0.00155 |
| Dhrs9             | 1.76061 | 0.00025 | Ttc27   | 0.94784 | 0.00005 | Cdc37l1           | 0.69948 | 0.00270 |
| Darc              | 1.76041 | 0.00820 | Apba3   | 0.94769 | 0.00035 | Letm1             | 0.69918 | 0.00005 |
| Synj2             | 1.75495 | 0.00040 | Abca2   | 0.94759 | 0.00025 | Sept4             | 0.69911 | 0.03055 |
| Mtss1l            | 1.74967 | 0.00195 | Mup11   | 0.94718 | 0.00340 | Wars              | 0.69868 | 0.00040 |
| Cmah              | 1.74864 | 0.00005 | Farsb   | 0.94692 | 0.00005 | 1190007l07Ri<br>k | 0.69759 | 0.02830 |
| Dhx29             | 1.74650 | 0.00005 | Rint1   | 0.94614 | 0.00010 | Mrps12            | 0.69745 | 0.00005 |
| Etv5              | 1.74550 | 0.00015 | Eef2k   | 0.94557 | 0.02035 | Clpp              | 0.69733 | 0.00010 |
| Basp1             | 1.73988 | 0.00020 | Mdm4    | 0.94497 | 0.02435 | Zfp36             | 0.69702 | 0.00010 |
| 1810033B17Ri<br>k | 1.73921 | 0.01795 | Gas2    | 0.94426 | 0.00005 | Gtf2h2            | 0.69675 | 0.01230 |
| Ppih              | 1.73711 | 0.00025 | Exoc1   | 0.94303 | 0.00430 | Dis3l             | 0.69670 | 0.00180 |
| Ppcdc             | 1.73703 | 0.00565 | Sirt5   | 0.94263 | 0.00005 | Pigu              | 0.69636 | 0.00080 |
| Cyp2a22           | 1.73369 | 0.00195 | Pigh    | 0.94131 | 0.00075 | Dctn5             | 0.69635 | 0.00010 |
| Phlda1            | 1.73060 | 0.00005 | Alg6    | 0.94123 | 0.00300 | Anxa2             | 0.69625 | 0.00280 |
| Gm5549            | 1.72476 | 0.00015 | Rangap1 | 0.94116 | 0.00005 | Nek4              | 0.69582 | 0.00295 |
| Hspe1             | 1.72285 | 0.00015 | Tuft1   | 0.94090 | 0.00095 | Pus1              | 0.69574 | 0.00475 |
| Sgsm1             | 1.71564 | 0.00955 | P4hb    | 0.94088 | 0.00005 | Wdr33             | 0.69565 | 0.00685 |
| Fam120b           | 1.70945 | 0.00470 | Fastkd2 | 0.94066 | 0.00020 | Abhd14a           | 0.69513 | 0.01010 |
| Dynll1            | 1.70847 | 0.00005 | Cenpc1  | 0.94000 | 0.00490 | Naprt1            | 0.69508 | 0.00005 |
| Gm14399           | 1.70796 | 0.00775 | Atic    | 0.93940 | 0.00005 | Zc3h12a           | 0.69494 | 0.00635 |
| Zbtb40            | 1.70183 | 0.00005 | Clpb    | 0.93937 | 0.00295 | Skiv2l2           | 0.69485 | 0.00385 |
| Nfkb2             | 1.70163 | 0.00055 | Esr1    | 0.93903 | 0.00005 | Pdcd5             | 0.69424 | 0.00285 |
| Isg15             | 1.69839 | 0.00005 | Ift88   | 0.93842 | 0.01395 | Tmem53            | 0.69383 | 0.00070 |
| Inmt              | 1.69609 | 0.00005 | Gfm1    | 0.93831 | 0.00005 | Nfu1              | 0.69351 | 0.00015 |
| Hist1h2be         | 1.69599 | 0.00270 | Psma1   | 0.93782 | 0.00005 | Pitpnc1           | 0.69349 | 0.04645 |
| Spata5            | 1.68228 | 0.00065 | Smim14  | 0.93780 | 0.00010 | Gpatch11          | 0.69299 | 0.00190 |
| Serpina12         | 1.68074 | 0.00055 | Sae1    | 0.93711 | 0.00005 | Mrpl16            | 0.69292 | 0.00005 |

|            |         |         |               |         |         |                   |         |         |
|------------|---------|---------|---------------|---------|---------|-------------------|---------|---------|
| Per2       | 1.68064 | 0.00005 | Krit1         | 0.93697 | 0.00255 | Prmt3             | 0.69274 | 0.00785 |
| Gclc       | 1.67658 | 0.00005 | Timmdc1       | 0.93675 | 0.00005 | Apip              | 0.69256 | 0.00365 |
| Lst1       | 1.67589 | 0.00300 | Mipep         | 0.93621 | 0.00005 | Msn               | 0.69167 | 0.00015 |
| Nfkbiz     | 1.66710 | 0.00005 | Eef1e1        | 0.93532 | 0.00005 | Txn1              | 0.69159 | 0.00005 |
| Dzip3      | 1.66429 | 0.00070 | Cldn14        | 0.93453 | 0.03160 | Gtf2e2            | 0.69066 | 0.00250 |
| Cyp2d37-ps | 1.66217 | 0.00010 | 0610040J01Rik | 0.93352 | 0.00005 | Abhd8             | 0.69065 | 0.03395 |
| E2f3       | 1.65687 | 0.02270 | Abca3         | 0.93308 | 0.00005 | Vamp5             | 0.69061 | 0.02130 |
| Serpine2   | 1.65265 | 0.00005 | Ran           | 0.93048 | 0.00240 | Prdx1             | 0.69057 | 0.01325 |
| Shank2     | 1.65161 | 0.00005 | Serpine1      | 0.92985 | 0.00015 | Tmem50b           | 0.69042 | 0.00970 |
| Cep97      | 1.64263 | 0.00105 | Xrcc6bp1      | 0.92964 | 0.01910 | Ppan              | 0.68936 | 0.02050 |
| Cxcr2      | 1.64101 | 0.00005 | Selk          | 0.92919 | 0.00005 | Cops7a            | 0.68904 | 0.00085 |
| Gm17296    | 1.63681 | 0.00305 | 1810043H04Rik | 0.92877 | 0.00005 | Vnn1              | 0.68881 | 0.00010 |
| I7Rn6      | 1.63618 | 0.00005 | Taf12         | 0.92873 | 0.00700 | Dynll2            | 0.68784 | 0.00005 |
| Hspa4l     | 1.63259 | 0.00005 | Psmc2         | 0.92757 | 0.00005 | Sirpa             | 0.68745 | 0.00245 |
| Prim1      | 1.62548 | 0.00010 | Zmat5         | 0.92723 | 0.00145 | Zeb2              | 0.68718 | 0.04410 |
| Tubb5      | 1.62193 | 0.00005 | Dhodh         | 0.92627 | 0.01755 | Nif3l1            | 0.68714 | 0.02075 |
| Acat2      | 1.62169 | 0.00005 | Lrrc28        | 0.92568 | 0.02980 | Parp14            | 0.68713 | 0.00005 |
| Dapk2      | 1.62103 | 0.03305 | Spidr         | 0.92548 | 0.00180 | Alas1             | 0.68701 | 0.00070 |
| Naa16      | 1.62009 | 0.00005 | Mgll          | 0.92493 | 0.00280 | Irf2bp1           | 0.68647 | 0.00130 |
| Hist1h2bq  | 1.61707 | 0.00210 | Ces2g         | 0.92457 | 0.00005 | Chmp5             | 0.68614 | 0.00005 |
| Ccl9       | 1.61462 | 0.00005 | Ipo4          | 0.92455 | 0.03465 | Ipo11             | 0.68563 | 0.00730 |
| Exog       | 1.60827 | 0.00045 | Fktn          | 0.92429 | 0.00030 | Lsr               | 0.68559 | 0.00015 |
| Ttll12     | 1.60269 | 0.00005 | Smarca4       | 0.92358 | 0.00005 | 0610030E20Ri<br>k | 0.68536 | 0.00025 |
| Olfm2      | 1.59765 | 0.00815 | Rpp30         | 0.92345 | 0.00180 | Dguok             | 0.68536 | 0.00630 |
| Xkr9       | 1.59716 | 0.00005 | Rfc3          | 0.92170 | 0.00740 | Arrb2             | 0.68528 | 0.00635 |
| Bdh2       | 1.59594 | 0.00005 | Mlxipl        | 0.92106 | 0.00025 | Gipc1             | 0.68525 | 0.00185 |
| Kctd7      | 1.59289 | 0.00335 | Bhlhe40       | 0.92106 | 0.00005 | Stt3a             | 0.68512 | 0.01575 |
| Slc26a10   | 1.58752 | 0.00335 | Ptcd2         | 0.92101 | 0.00005 | Cope              | 0.68511 | 0.00005 |
| Cyp4a12b   | 1.58255 | 0.00005 | Tubb6         | 0.92093 | 0.04025 | Rpp38             | 0.68495 | 0.02670 |
| Tsku       | 1.58228 | 0.00005 | Gm4950        | 0.91957 | 0.00070 | Nvl               | 0.68481 | 0.00085 |
| Ldlr       | 1.58193 | 0.00005 | Nol3          | 0.91911 | 0.00470 | Chd1l             | 0.68443 | 0.00300 |
| Uxs1       | 1.57371 | 0.00005 | C5ar1         | 0.91904 | 0.00795 | Tsc22d1           | 0.68442 | 0.00070 |
| Csf3r      | 1.57363 | 0.00005 | Fam114a1      | 0.91871 | 0.00005 | Mtfp1             | 0.68405 | 0.00195 |
| Myl9       | 1.57167 | 0.01540 | Cox15         | 0.91827 | 0.01535 | A1cf              | 0.68339 | 0.00005 |
| Zfp9       | 1.56816 | 0.00005 | Cd55          | 0.91772 | 0.00005 | Uggt1             | 0.68336 | 0.00050 |
| Dusp8      | 1.56719 | 0.00820 | Klhl36        | 0.91757 | 0.00485 | Abce1             | 0.68311 | 0.00005 |
| Serpina3g  | 1.56678 | 0.00005 | Dut           | 0.91740 | 0.00095 | Psm3              | 0.68310 | 0.00005 |
| Csf1       | 1.56510 | 0.00005 | Parp1         | 0.91706 | 0.00005 | Npri2             | 0.68291 | 0.00305 |
| Gstm4      | 1.56501 | 0.00005 | Chka          | 0.91489 | 0.00605 | Coil              | 0.68273 | 0.04580 |
| Gm379      | 1.56408 | 0.00005 | Ccdc30        | 0.91481 | 0.03535 | Mcm3ap            | 0.68264 | 0.00105 |
| Akap12     | 1.56383 | 0.01065 | Commd10       | 0.91456 | 0.00155 | Pno1              | 0.68237 | 0.00715 |
| Flywch2    | 1.56083 | 0.02115 | 1700021F05Rik | 0.91319 | 0.00005 | Chac2             | 0.68189 | 0.00250 |

|              |         |         |              |         |         |              |         |         |
|--------------|---------|---------|--------------|---------|---------|--------------|---------|---------|
| 4930402H24Ri |         |         |              |         |         |              |         |         |
| k            | 1.56068 | 0.00005 | Dnajb9       | 0.91279 | 0.00370 | Yipf6        | 0.68177 | 0.02815 |
| Map3k13      | 1.55813 | 0.00005 | Tbcel        | 0.91279 | 0.00005 | Tnfaip2      | 0.68137 | 0.01695 |
| Irf1         | 1.55575 | 0.00005 | Nkd1         | 0.91273 | 0.00665 | Pelo         | 0.68136 | 0.01100 |
| Palld        | 1.55531 | 0.00005 | Ces2e        | 0.91264 | 0.00005 | Fam35a       | 0.68133 | 0.00005 |
| 3110062M04Ri |         |         |              |         |         |              |         |         |
| k            | 1.55522 | 0.01535 | Trmt10a      | 0.91261 | 0.02060 | Ndufaf1      | 0.68049 | 0.00040 |
| Tead2        | 1.55501 | 0.02360 | Tmco3        | 0.91158 | 0.03350 | Tecpr2       | 0.68008 | 0.01625 |
| Cmpk2        | 1.55187 | 0.00005 | Wdyhv1       | 0.91117 | 0.00320 | Usp39        | 0.67987 | 0.00040 |
| Cyp1a2       | 1.55116 | 0.00005 | Mrpl38       | 0.90958 | 0.00005 | Mrpl44       | 0.67981 | 0.01620 |
| Cyb5b        | 1.54588 | 0.00005 | Mbd3         | 0.90878 | 0.00005 | Hdac10       | 0.67940 | 0.00855 |
| Phldb2       | 1.54496 | 0.00875 | Srr          | 0.90801 | 0.00210 | Wdr1         | 0.67933 | 0.00015 |
| Akr1c14      | 1.53649 | 0.00005 | Msr1         | 0.90670 | 0.00005 | Nupl1        | 0.67932 | 0.00405 |
| Mmd2         | 1.53644 | 0.00005 | Abcg3        | 0.90532 | 0.00350 | Smg5         | 0.67925 | 0.00015 |
| Relb         | 1.53633 | 0.00265 | 1700066M21Ri | 0.90531 | 0.00005 | Cacu1        | 0.67910 | 0.00005 |
|              |         |         | k            |         |         |              |         |         |
| Alad         | 1.53530 | 0.00005 | Ercc8        | 0.90495 | 0.01415 | Elac2        | 0.67860 | 0.00080 |
| Pwwp2b       | 1.53478 | 0.00200 | Golga1       | 0.90474 | 0.00805 | Bysl         | 0.67851 | 0.02005 |
| Raph1        | 1.52764 | 0.00005 | Fer          | 0.90472 | 0.00060 | Nhp2l1       | 0.67832 | 0.00015 |
| Tnip1        | 1.52662 | 0.00005 | Fndc3a       | 0.90465 | 0.00015 | Rprd1a       | 0.67809 | 0.00120 |
| Rpn1         | 1.52130 | 0.00005 | Nadk2        | 0.90371 | 0.00005 | Acnat1       | 0.67794 | 0.00080 |
| Adgb         | 1.52050 | 0.00060 | Pgs1         | 0.90350 | 0.00005 | Nop2         | 0.67756 | 0.00050 |
| Apol9a       | 1.51609 | 0.00005 | Gfm2         | 0.90345 | 0.00005 | Spp2         | 0.67749 | 0.01675 |
| Mmp15        | 1.51568 | 0.00005 | Pcbd1        | 0.90292 | 0.00005 | 0610007P14Ri | 0.67745 | 0.00005 |
|              |         |         |              |         |         | k            |         |         |
| Tuba8        | 1.51377 | 0.00005 | Tfrc         | 0.90212 | 0.00005 | Cdk5         | 0.67728 | 0.00210 |
| Col15a1      | 1.51034 | 0.00210 | Bpnt1        | 0.90176 | 0.00005 | Nol11        | 0.67713 | 0.00490 |
| Psph         | 1.50927 | 0.00005 | Hspbp1       | 0.90122 | 0.00005 | Rsad2        | 0.67668 | 0.01260 |
| Slc5a3       | 1.50621 | 0.00185 | Pak4         | 0.90072 | 0.00720 | G3bp1        | 0.67658 | 0.00070 |
| Cad          | 1.50577 | 0.00060 | Ost4         | 0.90022 | 0.00005 | Arf5         | 0.67643 | 0.00055 |
| Slc39a4      | 1.50149 | 0.00005 | Zfp579       | 0.90011 | 0.01940 | Clp1         | 0.67623 | 0.00055 |
| Uba5         | 1.49940 | 0.01875 | Rab20        | 0.89967 | 0.00030 | Chic1        | 0.67593 | 0.00525 |
| Mup17        | 1.49890 | 0.00005 | Thoc5        | 0.89913 | 0.00005 | Edem2        | 0.67589 | 0.00005 |
| Hn1          | 1.49442 | 0.00005 | Tert         | 0.89895 | 0.02090 | Nqo1         | 0.67572 | 0.00305 |
| Mrps27       | 1.48339 | 0.00005 | Thnsl2       | 0.89765 | 0.00005 | Cfdp1        | 0.67563 | 0.00005 |
| Gm14420      | 1.48138 | 0.00005 | Dhcr24       | 0.89758 | 0.00005 | Exosc10      | 0.67516 | 0.00115 |
| Serpina6     | 1.47763 | 0.00005 | Traf2        | 0.89661 | 0.00015 | Dexi         | 0.67499 | 0.04275 |
| Ahsa2        | 1.47231 | 0.00040 | Rai14        | 0.89613 | 0.00005 | Shroom3      | 0.67497 | 0.04650 |
| Nup35        | 1.47157 | 0.00035 | Larp7        | 0.89532 | 0.00065 | BC026585     | 0.67456 | 0.00155 |
| Tars2        | 1.47090 | 0.00005 | Ide          | 0.89507 | 0.00045 | Skiv2l       | 0.67421 | 0.00140 |
| Lifr         | 1.46995 | 0.00005 | Ldb2         | 0.89474 | 0.01075 | Mocos        | 0.67380 | 0.00005 |
| Cd274        | 1.46966 | 0.00155 | Acsml1       | 0.89345 | 0.00005 | Impact       | 0.67374 | 0.00045 |
| Insc         | 1.46955 | 0.00050 | Xk           | 0.89280 | 0.00110 | Sec14l2      | 0.67337 | 0.00010 |
| Tgm2         | 1.46747 | 0.00005 | Spes3        | 0.89274 | 0.00005 | Psmc7        | 0.67257 | 0.00005 |

|          |         |         |         |         |         |                   |         |         |
|----------|---------|---------|---------|---------|---------|-------------------|---------|---------|
| F11      | 1.46406 | 0.00005 | Ern1    | 0.89264 | 0.00005 | Mien1             | 0.67248 | 0.00005 |
| Chid1    | 1.45966 | 0.00175 | Nabp1   | 0.89083 | 0.00025 | Ikbkg             | 0.67226 | 0.00195 |
| Tnfrsf14 | 1.45691 | 0.00205 | Exosc3  | 0.89078 | 0.02025 | Cyp2j5            | 0.67171 | 0.00020 |
| Dnajb2   | 1.45669 | 0.00005 | Mlx     | 0.88990 | 0.00005 | Mrpl10            | 0.67133 | 0.00020 |
| Actb     | 1.45577 | 0.00005 | Slc7a8  | 0.88974 | 0.00070 | E2f4              | 0.67043 | 0.00075 |
| Mlec     | 1.45238 | 0.00005 | Apol9b  | 0.88967 | 0.00005 | Psmc3             | 0.67020 | 0.00005 |
| Tlr1     | 1.45078 | 0.00445 | Psmc2   | 0.88934 | 0.00005 | Atf6b             | 0.66979 | 0.00060 |
| Wwc1     | 1.45012 | 0.00005 | Ncbp2   | 0.88879 | 0.00160 | Psmb4             | 0.66959 | 0.00010 |
| Tbcb     | 1.45001 | 0.00005 | Mpp6    | 0.88760 | 0.00005 | Rmdn2             | 0.66920 | 0.00010 |
| Gm21887  | 1.44205 | 0.02580 | Hnrnpa3 | 0.88714 | 0.00055 | Ethe1             | 0.66906 | 0.00005 |
| Gm9396   | 1.44163 | 0.00005 | Mical2  | 0.88701 | 0.00005 | Rybp              | 0.66899 | 0.00030 |
| Gm527    | 1.43789 | 0.00155 | Gm5150  | 0.88688 | 0.04170 | 2810428115Ri<br>k | 0.66829 | 0.00020 |
| Nbas     | 1.43707 | 0.00005 | Tle4    | 0.88630 | 0.00010 | Pikfyve           | 0.66809 | 0.00265 |
| Mgme1    | 1.43110 | 0.02330 | S100a10 | 0.88625 | 0.00005 | Dnpep             | 0.66798 | 0.00005 |
| Hmox1    | 1.42004 | 0.00005 | Zfx3    | 0.88596 | 0.00040 | Cse1l             | 0.66730 | 0.01240 |
| Gbp7     | 1.41846 | 0.00005 | Tmem199 | 0.88584 | 0.00050 | Casp1             | 0.66683 | 0.03540 |
| Cyp2c70  | 1.41777 | 0.00005 | Bcl6    | 0.88575 | 0.00005 | Heatr5a           | 0.66678 | 0.00120 |
| Aox1     | 1.41722 | 0.00005 | Pet112  | 0.88511 | 0.04930 | Cmtr1             | 0.66621 | 0.00895 |
| Dbn1     | 1.41674 | 0.03615 | Edem1   | 0.88485 | 0.00005 | Zfp846            | 0.66601 | 0.04915 |
| Senp8    | 1.41478 | 0.00085 | Snap23  | 0.88398 | 0.00010 | Smyd5             | 0.66587 | 0.03110 |
| Slc25a37 | 1.41393 | 0.00005 | Usp21   | 0.88338 | 0.00120 | Psmg2             | 0.66587 | 0.00315 |
| Ikbke    | 1.41125 | 0.00005 | Ablim1  | 0.88289 | 0.00370 | Der12             | 0.66488 | 0.00105 |
| Tcea3    | 1.40334 | 0.00005 | Psmc6   | 0.88253 | 0.00005 | Wdr83             | 0.66440 | 0.01905 |
| Spc24    | 1.40259 | 0.00005 | Casp4   | 0.88246 | 0.04225 | D19Bwg1357<br>e   | 0.66433 | 0.00045 |
| Acly     | 1.40163 | 0.00005 | Dnm1l   | 0.88221 | 0.00005 | Pepd              | 0.66415 | 0.00010 |
| N6amt2   | 1.40134 | 0.00005 | Bin2    | 0.88219 | 0.00915 | Srbd1             | 0.66403 | 0.00530 |
| Rdm1     | 1.39899 | 0.00225 | Gnai3   | 0.88216 | 0.00005 | Timm10b           | 0.66386 | 0.02330 |
| Unkl     | 1.39701 | 0.00005 | Rnf213  | 0.88181 | 0.00065 | Fam162a           | 0.66353 | 0.00015 |
| Slc41a2  | 1.39670 | 0.00005 | Slc6a13 | 0.88142 | 0.00005 | Rap1gds1          | 0.66352 | 0.00035 |
| Nrxn1    | 1.39352 | 0.02365 | Abhd6   | 0.88139 | 0.00005 | Acy3              | 0.66322 | 0.00010 |
| Ddit3    | 1.39300 | 0.01375 | Alg3    | 0.88132 | 0.00075 | Snx6              | 0.66170 | 0.00070 |
| Ehhadh   | 1.39265 | 0.00005 | Pyroxd2 | 0.88111 | 0.00005 | Mctp2             | 0.66127 | 0.00050 |
| Lman2l   | 1.39186 | 0.00005 | Timm22  | 0.88078 | 0.00550 | Arf4              | 0.66117 | 0.00150 |
| Lpl      | 1.39082 | 0.00005 | Sec23b  | 0.88076 | 0.00005 | Srcap             | 0.66115 | 0.02560 |
| Ndufaf5  | 1.38658 | 0.00035 | Tufm    | 0.87913 | 0.00005 | 1110008P14Ri<br>k | 0.66039 | 0.00915 |
| Pdzk1    | 1.38653 | 0.00005 | Gm8991  | 0.87860 | 0.01840 | Fam45a            | 0.66029 | 0.00040 |
| Papss1   | 1.38372 | 0.00015 | Ptpn1   | 0.87815 | 0.01225 | Nsfl1c            | 0.66005 | 0.00010 |
| Slx4ip   | 1.38177 | 0.02980 | Tmem101 | 0.87634 | 0.00585 | Gcsh              | 0.65983 | 0.00005 |
| Igfals   | 1.37854 | 0.00005 | Ugt2b37 | 0.87614 | 0.00170 | Psmc4             | 0.65979 | 0.00005 |
| Mfhas1   | 1.37620 | 0.02865 | Acot13  | 0.87541 | 0.00005 | Tbc1d1            | 0.65958 | 0.03640 |
| Zfp931   | 1.37590 | 0.00010 | Rdh11   | 0.87503 | 0.00010 | Nup155            | 0.65958 | 0.00095 |

|          |         |         |               |         |         |                   |         |         |
|----------|---------|---------|---------------|---------|---------|-------------------|---------|---------|
| Sucnr1   | 1.37530 | 0.00005 | Ube2m         | 0.87493 | 0.00005 | Acat3             | 0.65954 | 0.00880 |
| Ddost    | 1.37423 | 0.00005 | Gm10053       | 0.87438 | 0.00040 | Kti12             | 0.65950 | 0.02250 |
| Alas2    | 1.37397 | 0.00005 | Cd52          | 0.87408 | 0.00485 | Ssbp1             | 0.65942 | 0.00055 |
| Gsta2    | 1.37028 | 0.00005 | Usp14         | 0.87364 | 0.00005 | Naa15             | 0.65885 | 0.00005 |
| Myl6b    | 1.36954 | 0.04350 | Stim2         | 0.87291 | 0.00110 | 1110058L19Ri<br>k | 0.65872 | 0.00105 |
| Gbe1     | 1.36926 | 0.00005 | Acaa1b        | 0.87243 | 0.00005 | Chn2              | 0.65846 | 0.00480 |
| Slc17a9  | 1.36786 | 0.00020 | Rscan18       | 0.87192 | 0.02200 | Pdlim5            | 0.65839 | 0.00005 |
| Nek6     | 1.36704 | 0.00150 | D3Erttd751e   | 0.87135 | 0.01425 | Vva5a             | 0.65810 | 0.00035 |
| Ahsa1    | 1.36517 | 0.00005 | Mrpl22        | 0.87132 | 0.00005 | Trappc6a          | 0.65796 | 0.01005 |
| Bst2     | 1.35561 | 0.00005 | Amt           | 0.87017 | 0.00005 | Agps              | 0.65789 | 0.02110 |
| Serf1    | 1.35554 | 0.00025 | Nup107        | 0.86996 | 0.00595 | Psmb5             | 0.65776 | 0.00005 |
| Dhx58    | 1.35548 | 0.01220 | Rnf145        | 0.86932 | 0.00005 | Arhgef3           | 0.65763 | 0.00410 |
| Paqr9    | 1.35531 | 0.00005 | Adsl          | 0.86812 | 0.00005 | Tmpo              | 0.65747 | 0.00030 |
| Cct3     | 1.35365 | 0.00005 | Bop1          | 0.86746 | 0.00185 | Lrpprc            | 0.65733 | 0.00005 |
| Dnajc3   | 1.35137 | 0.00005 | Emc1          | 0.86714 | 0.04885 | Rnf7              | 0.65664 | 0.00055 |
| Zbtb45   | 1.35036 | 0.00110 | Tsfm          | 0.86711 | 0.00045 | Scamp4            | 0.65652 | 0.00150 |
| Sel1l3   | 1.34994 | 0.00005 | Gm9755        | 0.86638 | 0.04460 | Arpc5l            | 0.65598 | 0.00025 |
| Nup205   | 1.34739 | 0.00005 | Alpl          | 0.86624 | 0.00045 | Lace1             | 0.65597 | 0.00655 |
| Gdf15    | 1.34718 | 0.00005 | Echdc3        | 0.86445 | 0.00005 | Ndufb10           | 0.65531 | 0.00005 |
| Krt8     | 1.34660 | 0.00005 | 2310045N01Rik | 0.86135 | 0.00050 | Sh3bp5l           | 0.65380 | 0.01575 |
| Mgst3    | 1.34409 | 0.00005 | Plxna2        | 0.86102 | 0.00070 | Stk38l            | 0.65379 | 0.00075 |
| Fstl1    | 1.34224 | 0.00300 | Tmem180       | 0.86029 | 0.04860 | Adrm1             | 0.65362 | 0.00005 |
| Erlin1   | 1.33950 | 0.00005 | Nol12         | 0.85955 | 0.00125 | Cyb561a3          | 0.65350 | 0.01685 |
| Junb     | 1.33877 | 0.00005 | Zfp628        | 0.85906 | 0.00355 | Copa              | 0.65337 | 0.00155 |
| Dnaja1   | 1.33852 | 0.00005 | Ppp1r14b      | 0.85904 | 0.00005 | Nol9              | 0.65297 | 0.00065 |
| Bcl3     | 1.33641 | 0.00005 | Itpa          | 0.85882 | 0.00005 | lft20             | 0.65283 | 0.00075 |
| Acsl3    | 1.33573 | 0.00005 | Gmcl1         | 0.85858 | 0.00005 | 9930021J03Ri<br>k | 0.65280 | 0.00605 |
| Stat1    | 1.33346 | 0.02370 | Kdm1b         | 0.85705 | 0.00050 | Noc3l             | 0.65277 | 0.00575 |
| Aqp4     | 1.32889 | 0.00010 | Plscr1        | 0.85702 | 0.00005 | Irf2bpl           | 0.65239 | 0.00115 |
| Gstm6    | 1.32821 | 0.00005 | Mageh1        | 0.85632 | 0.01775 | N4bp1             | 0.65220 | 0.00090 |
| Fpr2     | 1.32733 | 0.00200 | Polb          | 0.85602 | 0.00010 | Cenpj             | 0.65163 | 0.04885 |
| BC030307 | 1.32600 | 0.00200 | Trmt1l        | 0.85512 | 0.00005 | Irak2             | 0.65149 | 0.00235 |
| Ncf4     | 1.32471 | 0.00390 | Tmed3         | 0.85444 | 0.00005 | Nudcd1            | 0.65113 | 0.04645 |
| Hmbs     | 1.32442 | 0.00005 | Trmt61a       | 0.85409 | 0.00095 | Adamts1           | 0.65104 | 0.00440 |
| Bco2     | 1.32343 | 0.00005 | Gtf3a         | 0.85373 | 0.04060 | Pofut1            | 0.65101 | 0.03145 |
| Plekha2  | 1.32189 | 0.00250 | Xbp1          | 0.85327 | 0.00660 | Phb               | 0.65087 | 0.00195 |
| Sec61b   | 1.32153 | 0.00005 | Ezr           | 0.85310 | 0.02645 | Psmb6             | 0.65037 | 0.00025 |
| Hk3      | 1.31704 | 0.00055 | Plek          | 0.85293 | 0.00155 | 1190002N15R<br>ik | 0.65024 | 0.00020 |
| Aldh3a2  | 1.31624 | 0.00005 | Acn9          | 0.85276 | 0.00070 | Coasy             | 0.65000 | 0.00005 |
| Slco3a1  | 1.31429 | 0.00385 | Rexo2         | 0.85164 | 0.00005 | Pbdc1             | 0.64861 | 0.01550 |
| Mmaa     | 1.31393 | 0.00005 | Cox14         | 0.85149 | 0.00010 | Nr2f6             | 0.64843 | 0.00175 |



|                   |         |         |          |         |         |                   |         |         |
|-------------------|---------|---------|----------|---------|---------|-------------------|---------|---------|
| Gsap              | 1.31118 | 0.00005 | Mme      | 0.85061 | 0.00740 | Psm2              | 0.64817 | 0.00010 |
| Car2              | 1.31108 | 0.00015 | Pdss2    | 0.84995 | 0.00035 | Cldn2             | 0.64735 | 0.00010 |
| Gsta3             | 1.30934 | 0.00005 | Zc3hc1   | 0.84923 | 0.00540 | Plekhj1           | 0.64733 | 0.03080 |
| Mup20             | 1.30915 | 0.00005 | Aptx     | 0.84922 | 0.00350 | Stra13            | 0.64662 | 0.00150 |
| Tatdn1            | 1.30775 | 0.03980 | Vps33b   | 0.84830 | 0.00985 | Coq2              | 0.64641 | 0.00040 |
| Myppop            | 1.30520 | 0.02305 | Ptpn21   | 0.84812 | 0.00005 | Farsa             | 0.64606 | 0.00450 |
| Noa1              | 1.30488 | 0.00025 | Azin1    | 0.84804 | 0.00040 | Cers6             | 0.64531 | 0.00145 |
| Bcl6b             | 1.30467 | 0.00240 | Ifi35    | 0.84798 | 0.00005 | Tmem109           | 0.64493 | 0.00175 |
| Bag3              | 1.30248 | 0.00005 | Cct5     | 0.84713 | 0.00005 | Rbm28             | 0.64467 | 0.02030 |
| Ngf               | 1.29964 | 0.00390 | Etnk1    | 0.84712 | 0.00005 | Rwdd1             | 0.64458 | 0.00025 |
| Thop1             | 1.29917 | 0.00005 | Slc22a15 | 0.84662 | 0.00070 | Dpm3              | 0.64453 | 0.00365 |
| Kctd2             | 1.29806 | 0.00005 | Xpo1     | 0.84618 | 0.00005 | Arhgef19          | 0.64395 | 0.01565 |
| St6gal1           | 1.29786 | 0.00005 | Gcnt2    | 0.84609 | 0.00265 | Pqlc1             | 0.64363 | 0.00045 |
| Hdhd3             | 1.29405 | 0.00005 | Nfkbie   | 0.84554 | 0.03990 | Polr3e            | 0.64279 | 0.00140 |
| Bdh1              | 1.29346 | 0.00005 | Set      | 0.84521 | 0.00005 | Zcrb1             | 0.64237 | 0.00145 |
| Btbd10            | 1.29308 | 0.00125 | Rpa3     | 0.84442 | 0.00740 | Col3a1            | 0.64234 | 0.01270 |
| Cyp2c67           | 1.29286 | 0.00005 | Rpe      | 0.84345 | 0.00005 | Ywhag             | 0.64219 | 0.00020 |
| Cela1             | 1.28929 | 0.00005 | Slc26a1  | 0.84311 | 0.00015 | Ugt2b5            | 0.64176 | 0.00050 |
| Trim65            | 1.28924 | 0.00005 | Tmem55a  | 0.84300 | 0.00020 | Hsf1              | 0.64172 | 0.00500 |
| Lasp1             | 1.28491 | 0.00005 | Hgf      | 0.84254 | 0.00060 | Babam1            | 0.64161 | 0.00015 |
| Adora2a           | 1.28426 | 0.00620 | Lsm2     | 0.84217 | 0.00045 | Lcp1              | 0.64159 | 0.00070 |
| Dus2l             | 1.28391 | 0.01820 | Pir      | 0.84177 | 0.00005 | Hck               | 0.64141 | 0.00705 |
| Snrpa             | 1.28383 | 0.00005 | Psen2    | 0.84148 | 0.00005 | Top1              | 0.64123 | 0.00015 |
| Ccr1              | 1.28343 | 0.00530 | Slirp    | 0.84102 | 0.02455 | BC052040          | 0.64086 | 0.04675 |
| Cstf3             | 1.28340 | 0.00045 | Mcph1    | 0.84100 | 0.03115 | Ajuba             | 0.64077 | 0.01375 |
| Cxcl9             | 1.28276 | 0.00055 | Gja1     | 0.84088 | 0.00050 | Eif2b5            | 0.64024 | 0.00150 |
| Pcp4l1            | 1.28223 | 0.00235 | Leo1     | 0.84039 | 0.00005 | Zfp148            | 0.64013 | 0.00045 |
| Gmpr2             | 1.28079 | 0.00005 | Plod3    | 0.83802 | 0.02350 | Aldh4a1           | 0.63997 | 0.00020 |
| Ccdc85c           | 1.27970 | 0.00040 | Tnfrsf21 | 0.83732 | 0.00110 | Cpsf1             | 0.63987 | 0.00390 |
| Egr1              | 1.27929 | 0.00005 | Mrpl50   | 0.83726 | 0.00005 | Lilrb4            | 0.63977 | 0.02280 |
| Adrb2             | 1.27924 | 0.00245 | Lap3     | 0.83724 | 0.00005 | Eed               | 0.63890 | 0.00090 |
| Pkdcc             | 1.27767 | 0.00005 | Mrpl35   | 0.83691 | 0.00005 | Lamtor2           | 0.63876 | 0.00055 |
| Meiob             | 1.27754 | 0.00025 | Immp1l   | 0.83685 | 0.00035 | Slc35a1           | 0.63837 | 0.00230 |
| Fabp1             | 1.27434 | 0.00005 | Fam213b  | 0.83684 | 0.00025 | Nsmce1            | 0.63810 | 0.00260 |
| Mettl22           | 1.27370 | 0.00005 | Gtf2h3   | 0.83592 | 0.00730 | Foxa1             | 0.63804 | 0.00645 |
| Gm14403           | 1.27183 | 0.00130 | Ssr3     | 0.83492 | 0.00005 | Armxc3            | 0.63757 | 0.00670 |
| 2010003K11Ri<br>k | 1.27157 | 0.00005 | Slco2b1  | 0.83487 | 0.00050 | Diablo            | 0.63728 | 0.00070 |
| Lmnb2             | 1.27154 | 0.00005 | Rasgrp3  | 0.83425 | 0.00100 | Nagk              | 0.63726 | 0.00595 |
| Tnfrsf11b         | 1.27049 | 0.00045 | Aco1     | 0.83405 | 0.00005 | 2510009E07Ri<br>k | 0.63722 | 0.00470 |
| Olfir1034         | 1.27008 | 0.00315 | Hipk2    | 0.83241 | 0.00380 | Ube2s             | 0.63716 | 0.00090 |
| Cnpy4             | 1.26814 | 0.00005 | Slc15a3  | 0.83238 | 0.00265 | Scamp3            | 0.63706 | 0.00030 |
| Onecut1           | 1.26808 | 0.00015 | Pcbd2    | 0.83203 | 0.00045 | Tst               | 0.63706 | 0.00015 |

|              |         |         |               |         |         |              |         |         |
|--------------|---------|---------|---------------|---------|---------|--------------|---------|---------|
| Cebpe        | 1.26770 | 0.00005 | Ubqln1        | 0.83134 | 0.00005 | Yif1a        | 0.63658 | 0.00030 |
| Spred1       | 1.26728 | 0.00005 | Mrpl45        | 0.83047 | 0.00005 | Cebpg        | 0.63586 | 0.00095 |
| Ears2        | 1.26647 | 0.00340 | Pstpip2       | 0.83040 | 0.00735 | Cyp2a5       | 0.63571 | 0.00040 |
| 2700029M09Ri |         |         |               |         |         |              |         |         |
| k            | 1.26637 | 0.00060 | Msrb2         | 0.83015 | 0.00050 | Psma5        | 0.63549 | 0.00005 |
| Wdr76        | 1.26472 | 0.00205 | Prr16         | 0.83004 | 0.00005 | Klhl28       | 0.63530 | 0.02835 |
| Aldh1a1      | 1.26266 | 0.00005 | Ercc1         | 0.82971 | 0.04065 | Dnajb14      | 0.63508 | 0.00075 |
| Hao1         | 1.25983 | 0.00005 | BC037034      | 0.82964 | 0.00130 | Cyp2r1       | 0.63484 | 0.00405 |
| Slc35b1      | 1.25677 | 0.00005 | Ndufa12       | 0.82951 | 0.00005 | Snx27        | 0.63472 | 0.00100 |
| Ddx58        | 1.25660 | 0.00005 | Slmo2         | 0.82903 | 0.00005 | Sort1        | 0.63460 | 0.00960 |
| Cenpt        | 1.25652 | 0.02250 | Psmc5         | 0.82848 | 0.00005 | Ebna1bp2     | 0.63446 | 0.01120 |
| Nudt13       | 1.25518 | 0.00010 | Osbpl8        | 0.82724 | 0.00005 | Cmas         | 0.63419 | 0.00020 |
| Ccl25        | 1.25241 | 0.01120 | Zfp873        | 0.82692 | 0.03460 | Mdh1         | 0.63358 | 0.01130 |
| Yars2        | 1.25150 | 0.00005 | Osbp          | 0.82578 | 0.00005 | Ccdc58       | 0.63314 | 0.00070 |
| Cdk2ap2      | 1.25100 | 0.00005 | Clptm1        | 0.82511 | 0.00005 | Cyc1         | 0.63310 | 0.00010 |
| Alg12        | 1.25060 | 0.00005 | Ftsj2         | 0.82503 | 0.01145 | Cetn3        | 0.63297 | 0.00095 |
| Tmem41b      | 1.24980 | 0.00005 | Isg20         | 0.82491 | 0.02425 | Sec22b       | 0.63233 | 0.00055 |
| 8430408G22Ri |         |         |               |         |         |              |         |         |
| k            | 1.24952 | 0.00135 | Syde1         | 0.82480 | 0.02585 | Ubqln4       | 0.63182 | 0.00055 |
| Abcb11       | 1.24930 | 0.00005 | Gm21967       | 0.82470 | 0.03460 | Rell1        | 0.63174 | 0.00490 |
| Dip2a        | 1.24687 | 0.01250 | Apol7a        | 0.82452 | 0.00005 | Epb4.114b    | 0.63168 | 0.00005 |
| Osgin1       | 1.24687 | 0.00005 | Aif1          | 0.82430 | 0.01520 | Rabggta      | 0.63167 | 0.00095 |
| Smarcb1      | 1.24613 | 0.00005 | Aldh1b1       | 0.82428 | 0.00005 | Tubg1        | 0.63152 | 0.00070 |
| Alg8         | 1.24521 | 0.00050 | Srrt          | 0.82420 | 0.00005 | Abhd16a      | 0.63149 | 0.01780 |
| Paox         | 1.24397 | 0.00005 | Pcbp1         | 0.82348 | 0.00005 | Sfxn5        | 0.63141 | 0.00280 |
| Mrps6        | 1.24385 | 0.00020 | Ampd2         | 0.82340 | 0.02735 | Dusp16       | 0.63063 | 0.00035 |
| Sdr9c7       | 1.24223 | 0.00005 | Thap2         | 0.82297 | 0.00060 | Serpind1     | 0.63048 | 0.00130 |
| Nav2         | 1.24014 | 0.00575 | Ranbp1        | 0.82272 | 0.00155 | Surf4        | 0.63001 | 0.00115 |
| Akr1c6       | 1.23985 | 0.00005 | Ifi47         | 0.82241 | 0.00990 | Yipf5        | 0.62980 | 0.00025 |
| Serp1        | 1.23939 | 0.00005 | 3830406C13Rik | 0.82235 | 0.00010 | Pigyl        | 0.62970 | 0.00190 |
| Ddx17        | 1.23921 | 0.00035 | Hist1h2bc     | 0.82232 | 0.00005 | Smim15       | 0.62930 | 0.00050 |
| Hist1h4i     | 1.23838 | 0.01780 | Pip4k2b       | 0.82225 | 0.00040 | Siva1        | 0.62930 | 0.04725 |
| Dtymk        | 1.23758 | 0.00005 | Sh3pxd2a      | 0.82132 | 0.00005 | Qprt         | 0.62914 | 0.00010 |
| Magt1        | 1.23715 | 0.00005 | Agl           | 0.82122 | 0.00005 | Prrc2a       | 0.62913 | 0.01265 |
| Pnpla7       | 1.23713 | 0.00005 | Ino80e        | 0.82117 | 0.00880 | Mrpl28       | 0.62910 | 0.00070 |
| Pnpt1        | 1.23649 | 0.00005 | Ergic1        | 0.82074 | 0.00005 | 4930430F08Ri | 0.62895 | 0.04570 |
|              |         |         |               |         |         | k            |         |         |
| Ecscr        | 1.23644 | 0.00165 | Vac14         | 0.82045 | 0.00015 | Xiap         | 0.62840 | 0.00030 |
| Tgfa         | 1.23433 | 0.00005 | Nol10         | 0.82039 | 0.00145 | Trmt6        | 0.62835 | 0.00545 |
| Gtf3c5       | 1.23366 | 0.00005 | Ncor2         | 0.82039 | 0.00930 | Smarcc1      | 0.62812 | 0.00140 |
| Ido2         | 1.22895 | 0.00005 | Oxnad1        | 0.81912 | 0.00535 | Pim1         | 0.62801 | 0.00905 |
| Ppp1r3b      | 1.22775 | 0.00005 | Psmb3         | 0.81908 | 0.00005 | Psme2        | 0.62670 | 0.00125 |
| Slc9a3r1     | 1.22627 | 0.00005 | Syt1          | 0.81907 | 0.00220 | Qrs1         | 0.62670 | 0.02260 |
| Smyd3        | 1.22375 | 0.03275 | Limk1         | 0.81862 | 0.04415 | Pus3         | 0.62631 | 0.03605 |

|              |         |         |          |         |         |         |         |         |
|--------------|---------|---------|----------|---------|---------|---------|---------|---------|
| Maged2       | 1.22138 | 0.00010 | Fam136a  | 0.81802 | 0.00005 | Usp12   | 0.62625 | 0.00035 |
| Gda          | 1.22121 | 0.00005 | Habp4    | 0.81780 | 0.00005 | Eef1g   | 0.62606 | 0.00005 |
| Entpd6       | 1.21937 | 0.00005 | Ndufab1  | 0.81759 | 0.00005 | Tmed2   | 0.62598 | 0.00080 |
| Mrps22       | 1.21653 | 0.00005 | Snrnp48  | 0.81749 | 0.00035 | Cbwd1   | 0.62585 | 0.03690 |
| Gm14327      | 1.21623 | 0.00130 | Gm10146  | 0.81749 | 0.03885 | Lipg    | 0.62549 | 0.02040 |
| Creld1       | 1.21527 | 0.00005 | Rgs3     | 0.81672 | 0.02040 | Hars    | 0.62539 | 0.00260 |
| Ccl24        | 1.21390 | 0.00360 | Tvp23b   | 0.81671 | 0.00025 | Cped1   | 0.62503 | 0.00485 |
| P4ha2        | 1.21274 | 0.00275 | Map1s    | 0.81610 | 0.01410 | Mrpl46  | 0.62500 | 0.01150 |
| Rpia         | 1.21195 | 0.01370 | Ppa1     | 0.81609 | 0.00005 | Riok2   | 0.62442 | 0.00035 |
| Fam26f       | 1.21124 | 0.04465 | Usf1     | 0.81460 | 0.00560 | Nolc1   | 0.62417 | 0.00040 |
| Ifitm1       | 1.21109 | 0.00005 | Ifih1    | 0.81394 | 0.00005 | Rtkn    | 0.62408 | 0.02880 |
| Alpk1        | 1.21050 | 0.00290 | Ddhd1    | 0.81386 | 0.00080 | Fip11i  | 0.62401 | 0.02610 |
| Srm          | 1.20952 | 0.00005 | Mllt1    | 0.81366 | 0.00005 | Nab1    | 0.62398 | 0.00030 |
| Canx         | 1.20916 | 0.00005 | Exoc6b   | 0.81336 | 0.00515 | Siah2   | 0.62371 | 0.00185 |
| Zcchc10      | 1.20902 | 0.00110 | Grtp1    | 0.81317 | 0.00005 | Tmem242 | 0.62357 | 0.00070 |
| Cxx1a        | 1.20782 | 0.00810 | Mrpl37   | 0.81266 | 0.00005 | Tsen2   | 0.62342 | 0.02755 |
| Ints3        | 1.20684 | 0.00005 | Kdelr2   | 0.81238 | 0.00005 | Acyp1   | 0.62271 | 0.01995 |
| Ostc         | 1.20573 | 0.00005 | Krr1     | 0.81175 | 0.00150 | Ndufs1  | 0.62267 | 0.00040 |
| Snai2        | 1.20442 | 0.00005 | Cdc34    | 0.81168 | 0.00005 | Abca9   | 0.62258 | 0.02140 |
| 3110052M02Ri |         |         |          |         |         |         |         |         |
| k            | 1.20382 | 0.00545 | Szrd1    | 0.81135 | 0.00260 | Nat8    | 0.62237 | 0.03950 |
| Hagh         | 1.20234 | 0.00005 | Gstm7    | 0.81069 | 0.00005 | Mup15   | 0.62197 | 0.00610 |
| 1110057K04Ri |         |         |          |         |         |         |         |         |
| k            | 1.20181 | 0.00005 | Smad2    | 0.81066 | 0.02080 | Inpp5f  | 0.62121 | 0.00065 |
| Tbc1d2b      | 1.20108 | 0.00005 | Cxcl16   | 0.81054 | 0.03345 | Mrpl41  | 0.62107 | 0.00280 |
| Igtp         | 1.19920 | 0.00005 | Aars2    | 0.81038 | 0.00025 | Mrpl42  | 0.62105 | 0.00080 |
| Xylt1        | 1.19908 | 0.01460 | Ugp2     | 0.81030 | 0.00005 | Snrpf   | 0.62081 | 0.01230 |
| Slc11a2      | 1.19853 | 0.00005 | Med28    | 0.81014 | 0.00035 | Mrpl55  | 0.62067 | 0.00840 |
| BC029214     | 1.19763 | 0.00005 | Serpinh1 | 0.80983 | 0.00125 | Lactb   | 0.62035 | 0.00020 |
| Fubp1        | 1.19761 | 0.00005 | Sema6a   | 0.80972 | 0.01050 | Ptpla   | 0.62019 | 0.02750 |
| Gimap9       | 1.19745 | 0.00005 | Fam98a   | 0.80968 | 0.00005 | Hccs    | 0.62016 | 0.00825 |
| Sec61g       | 1.19745 | 0.00005 | Rel      | 0.80918 | 0.01455 | St5     | 0.62013 | 0.00215 |
| Actg1        | 1.19517 | 0.00005 | Impa1    | 0.80870 | 0.00005 | Cebpb   | 0.61945 | 0.00105 |
| Lama4        | 1.19381 | 0.04280 | Ipo13    | 0.80827 | 0.00250 | Spty2d1 | 0.61924 | 0.00130 |
| Pycr2        | 1.19317 | 0.00005 | Ppil3    | 0.80820 | 0.03840 | Rnf141  | 0.61901 | 0.02040 |
| Gcat         | 1.19162 | 0.00005 | Nars     | 0.80806 | 0.00005 | Rin3    | 0.61897 | 0.00475 |
| Pmvk         | 1.19150 | 0.00005 | Ppp1r35  | 0.80744 | 0.00480 | Fabp5   | 0.61870 | 0.00830 |
| 2700097O09Ri |         |         |          |         |         |         |         |         |
| k            | 1.19103 | 0.00070 | Prpf19   | 0.80741 | 0.00005 | Usp6nl  | 0.61847 | 0.00110 |
| Scimp        | 1.19081 | 0.03375 | Ngdn     | 0.80728 | 0.00005 | Bcr     | 0.61840 | 0.00040 |
| Nme6         | 1.19068 | 0.00005 | Fam220a  | 0.80668 | 0.00330 | Irf6    | 0.61836 | 0.00150 |
| Umps         | 1.19062 | 0.00005 | Arap3    | 0.80650 | 0.00030 | Rfng    | 0.61818 | 0.00510 |
| Ddah1        | 1.18985 | 0.00005 | Exoc3    | 0.80625 | 0.00005 | Uba6    | 0.61749 | 0.02520 |
| Apobec1      | 1.18983 | 0.00005 | Fam149b  | 0.80573 | 0.00020 | Ctnnb1  | 0.61639 | 0.00015 |

|                   |         |         |               |         |         |          |         |         |
|-------------------|---------|---------|---------------|---------|---------|----------|---------|---------|
| Bank1             | 1.18979 | 0.00430 | Tmcc1         | 0.80554 | 0.00230 | Anapc11  | 0.61636 | 0.00875 |
| Tmx2              | 1.18932 | 0.00020 | Plekhg1       | 0.80524 | 0.04180 | Slc9a6   | 0.61615 | 0.04570 |
| Josd2             | 1.18859 | 0.00005 | Gdi1          | 0.80468 | 0.00160 | Snx19    | 0.61565 | 0.00085 |
| Alox5ap           | 1.18802 | 0.00275 | Tmem150a      | 0.80461 | 0.00080 | Pkm      | 0.61542 | 0.00120 |
| Sebox             | 1.18730 | 0.00420 | Cwf1911       | 0.80433 | 0.00115 | Hinfp    | 0.61528 | 0.03525 |
| Coq5              | 1.18671 | 0.00005 | H2afx         | 0.80370 | 0.00020 | Tti1     | 0.61528 | 0.02910 |
| Ankrd26           | 1.18661 | 0.00720 | Cml2          | 0.80359 | 0.00025 | Ap1b1    | 0.61526 | 0.00145 |
| Fntb              | 1.18438 | 0.03985 | Mccc1         | 0.80330 | 0.00005 | Glyat    | 0.61517 | 0.00835 |
| Slc16a6           | 1.18400 | 0.01165 | Mrps16        | 0.80297 | 0.00025 | Zc3h11a  | 0.61471 | 0.02095 |
| Cxadr             | 1.18387 | 0.00005 | Stoml2        | 0.80223 | 0.00210 | Stard3nl | 0.61470 | 0.00530 |
| Zranb2            | 1.18374 | 0.00005 | Ttc32         | 0.80154 | 0.00040 | Rtp3     | 0.61464 | 0.00090 |
| Ccnd2             | 1.18294 | 0.00015 | Pvr           | 0.80138 | 0.00115 | Ap2b1    | 0.61404 | 0.00170 |
| Dhrs11            | 1.18126 | 0.00005 | Exoc4         | 0.79945 | 0.00010 | Spag7    | 0.61397 | 0.00080 |
| Ugt2b34           | 1.18022 | 0.00005 | Mical3        | 0.79911 | 0.03580 | Mavs     | 0.61392 | 0.00015 |
| Trp53             | 1.18009 | 0.00020 | Sec61a1       | 0.79856 | 0.00545 | Rpn2     | 0.61349 | 0.00005 |
| Sars2             | 1.17963 | 0.00005 | Aip           | 0.79856 | 0.00005 | Slc9a8   | 0.61318 | 0.00075 |
| Dcun1d2           | 1.17891 | 0.00005 | Mad111        | 0.79758 | 0.01760 | Zscan22  | 0.61315 | 0.02005 |
| Tjp3              | 1.17766 | 0.00595 | Nqo2          | 0.79720 | 0.00040 | Smpd4    | 0.61303 | 0.03880 |
| Psm14             | 1.17413 | 0.00005 | Pilrb1        | 0.79575 | 0.04640 | Fam43a   | 0.61285 | 0.02015 |
| Fermt2            | 1.17347 | 0.00005 | Pygl          | 0.79518 | 0.00005 | Hnrnpf   | 0.61194 | 0.00065 |
| Tlr12             | 1.17265 | 0.00910 | Als2          | 0.79502 | 0.00005 | Snx18    | 0.61190 | 0.00045 |
| Rgs19             | 1.17197 | 0.01145 | Camkk2        | 0.79495 | 0.00065 | Ghitm    | 0.61188 | 0.00035 |
| Uchl3             | 1.17148 | 0.00005 | Polr2d        | 0.79479 | 0.01410 | Zbtb20   | 0.61186 | 0.00615 |
| Tra2a             | 1.17127 | 0.00005 | Thrb          | 0.79451 | 0.00005 | Zfp146   | 0.61169 | 0.00165 |
| Gng11             | 1.16934 | 0.00020 | Mrps36        | 0.79344 | 0.00730 | Nudt2    | 0.61141 | 0.01165 |
| Dock8             | 1.16750 | 0.00005 | Nr2c2ap       | 0.79336 | 0.02505 | Hspa9    | 0.61135 | 0.00040 |
| Traf3             | 1.16725 | 0.00030 | Nadk          | 0.79280 | 0.00005 | Edf1     | 0.61093 | 0.00005 |
| Fam185a           | 1.16253 | 0.00030 | Clec16a       | 0.79257 | 0.00355 | Psma6    | 0.61092 | 0.00010 |
| Nupr1             | 1.16143 | 0.02205 | Ly6a          | 0.79124 | 0.01200 | Nudt1    | 0.61080 | 0.01360 |
| Clcn6             | 1.16110 | 0.01460 | Gstt1         | 0.79119 | 0.00005 | Cars     | 0.61064 | 0.00805 |
| Pycr1             | 1.16058 | 0.00005 | Atf5          | 0.79092 | 0.00005 | Mtg1     | 0.60999 | 0.00375 |
| Far1              | 1.16046 | 0.01120 | Tmed9         | 0.79038 | 0.00005 | Rnf5     | 0.60957 | 0.00050 |
| Ints2             | 1.15992 | 0.04710 | Usp1          | 0.79031 | 0.01435 | Rock2    | 0.60952 | 0.00635 |
| Mmp19             | 1.15912 | 0.00005 | Bet1          | 0.79004 | 0.00005 | Cog4     | 0.60947 | 0.00575 |
| Ncald             | 1.15599 | 0.00395 | Ces3a         | 0.78984 | 0.00030 | Rmdn3    | 0.60926 | 0.00035 |
| Gm5422            | 1.15562 | 0.02460 | Elk3          | 0.78966 | 0.04415 | Dnajc2   | 0.60920 | 0.00075 |
| 1810009A15Ri<br>k | 1.15542 | 0.00005 | Prkd2         | 0.78889 | 0.00360 | Eif4g1   | 0.60903 | 0.00085 |
| Fam96b            | 1.15502 | 0.00015 | Znrd1         | 0.78858 | 0.00195 | Pfdn1    | 0.60901 | 0.00225 |
| Armxc4            | 1.15468 | 0.00005 | Ppcs          | 0.78845 | 0.00045 | Grif1    | 0.60856 | 0.00010 |
| Gtpbp8            | 1.15435 | 0.00285 | 2410127L17Rik | 0.78805 | 0.00055 | Acs4     | 0.60823 | 0.00150 |
| Hpgd              | 1.15435 | 0.00005 | 3110040N11Rik | 0.78754 | 0.01010 | Zswim7   | 0.60816 | 0.01045 |
| Psm15             | 1.15217 | 0.00005 | Cdkal1        | 0.78744 | 0.00795 | Dars     | 0.60815 | 0.00005 |
| Mthfd2            | 1.15176 | 0.01740 | Hbb-bt        | 0.78649 | 0.00015 | Srxn1    | 0.60804 | 0.00025 |

|                   |         |         |          |         |         |         |         |         |
|-------------------|---------|---------|----------|---------|---------|---------|---------|---------|
| Ggcx              | 1.15065 | 0.00005 | Sema3f   | 0.78541 | 0.00640 | Daam1   | 0.60800 | 0.00055 |
| Hip1r             | 1.15010 | 0.00005 | Tmem167  | 0.78507 | 0.00195 | Gopc    | 0.60793 | 0.00055 |
| Stk40             | 1.14981 | 0.00005 | Usp48    | 0.78453 | 0.00165 | Ric8b   | 0.60779 | 0.01915 |
| Polr3g            | 1.14906 | 0.00910 | Hdc      | 0.78406 | 0.02930 | Slc39a7 | 0.60720 | 0.00485 |
| Ociad2            | 1.14641 | 0.00005 | Rabepk   | 0.78350 | 0.02625 | Ccdc41  | 0.60671 | 0.01925 |
| Ptges3            | 1.14635 | 0.00005 | Rrbp1    | 0.78287 | 0.00070 | Ube3c   | 0.60630 | 0.00635 |
| Pinx1             | 1.14597 | 0.00105 | Rnf121   | 0.78235 | 0.00005 | Fkbp2   | 0.60625 | 0.00065 |
| Prpsap2           | 1.14491 | 0.00005 | Ak4      | 0.78215 | 0.00005 | Olfml1  | 0.60603 | 0.02315 |
| Lamb1             | 1.14475 | 0.01310 | Ints5    | 0.78202 | 0.00050 | Arf6    | 0.60591 | 0.00030 |
| Idh1              | 1.14328 | 0.00005 | Mtap     | 0.78198 | 0.00005 | Anxa5   | 0.60545 | 0.02400 |
| Slc25a17          | 1.14269 | 0.00005 | Bcdin3d  | 0.78167 | 0.04915 | Kptn    | 0.60542 | 0.00985 |
| Tada3             | 1.14228 | 0.00010 | Plxnd1   | 0.78132 | 0.00020 | Rbm15   | 0.60535 | 0.01265 |
| Acaca             | 1.14198 | 0.00010 | Vcl      | 0.78118 | 0.04400 | Mup21   | 0.60521 | 0.00050 |
| Robo1             | 1.14183 | 0.00010 | Copz1    | 0.78096 | 0.00005 | Tm2d3   | 0.60511 | 0.01080 |
| Lacc1             | 1.14113 | 0.00005 | Psma4    | 0.78096 | 0.00005 | Luc7l   | 0.60494 | 0.00250 |
| Me1               | 1.14041 | 0.00005 | Gm10036  | 0.78070 | 0.04855 | Top1mt  | 0.60468 | 0.00240 |
| Cbx5              | 1.14023 | 0.00030 | Gart     | 0.78029 | 0.00095 | Akt2    | 0.60446 | 0.00035 |
| Camsap1           | 1.13935 | 0.00200 | Slc25a21 | 0.78009 | 0.00415 | Trmt5   | 0.60435 | 0.02125 |
| Ruvbl2            | 1.13916 | 0.00005 | Ddc      | 0.77974 | 0.00020 | Alkbh2  | 0.60431 | 0.03305 |
| Polr3k            | 1.13870 | 0.00005 | Cgn      | 0.77964 | 0.00030 | Pdrg1   | 0.60430 | 0.00760 |
| Calm1             | 1.13868 | 0.00010 | Krtcap2  | 0.77885 | 0.00005 | Bcar3   | 0.60408 | 0.00085 |
| P2ry6             | 1.13767 | 0.00380 | Uso1     | 0.77870 | 0.00030 | Tomm6   | 0.60408 | 0.00620 |
| Nutf2             | 1.13622 | 0.00005 | Yif1b    | 0.77864 | 0.00320 | Hspa8   | 0.60405 | 0.01215 |
| Isoc2b            | 1.13564 | 0.00005 | Zfp706   | 0.77789 | 0.00005 | Slc30a5 | 0.60393 | 0.00015 |
| Psd3              | 1.13532 | 0.00005 | Xrcc6    | 0.77770 | 0.04705 | Cldn5   | 0.60393 | 0.04290 |
| Htt               | 1.13469 | 0.00005 | Gpn1     | 0.77730 | 0.00920 | Sympk   | 0.60334 | 0.00035 |
| Hsp90ab1          | 1.13395 | 0.00005 | Ccdc51   | 0.77682 | 0.00070 | Ndufs6  | 0.60294 | 0.00170 |
| Cct7              | 1.13315 | 0.00005 | Pgap1    | 0.77590 | 0.00010 | Rab32   | 0.60264 | 0.00030 |
| Gpam              | 1.13302 | 0.00005 | Mrps28   | 0.77584 | 0.00555 | Ap1g1   | 0.60242 | 0.00390 |
| S1pr1             | 1.13253 | 0.00005 | St13     | 0.77566 | 0.00010 | Cltb    | 0.60234 | 0.00095 |
| Agtppb1           | 1.13246 | 0.00150 | Slc10a5  | 0.77542 | 0.00005 | Mtif2   | 0.60219 | 0.00045 |
| Ppid              | 1.13164 | 0.00005 | Slc22a18 | 0.77475 | 0.00005 | Bloc1s4 | 0.60215 | 0.00380 |
| Erc2              | 1.12727 | 0.00005 | Cdk5rap3 | 0.77441 | 0.03815 | Mpst    | 0.60194 | 0.00025 |
| Magee1            | 1.12694 | 0.00745 | Eral1    | 0.77393 | 0.00045 | Fbl     | 0.60181 | 0.00100 |
| Scly              | 1.12561 | 0.00005 | Lman1    | 0.77389 | 0.00005 | Rtp4    | 0.60156 | 0.00820 |
| Sipa1l3           | 1.12553 | 0.00945 | Nostrin  | 0.77388 | 0.00020 | Ube2f   | 0.60147 | 0.00255 |
| Ormdl2            | 1.12475 | 0.00005 | Dtx3l    | 0.77384 | 0.01770 | Mrps18c | 0.60012 | 0.00130 |
| Hsd17b12          | 1.12289 | 0.00005 | Nktr     | 0.77360 | 0.00110 | Arpp19  | 0.59991 | 0.00705 |
| Parp11            | 1.12231 | 0.01465 | Rpl22l1  | 0.77287 | 0.00010 | Cetn2   | 0.59969 | 0.01105 |
| Zc3h8             | 1.12018 | 0.00515 | Smad6    | 0.77181 | 0.03705 | Tbl1x   | 0.59960 | 0.00045 |
| Pilra             | 1.11910 | 0.02265 | Selt     | 0.77129 | 0.00005 | Pdzd11  | 0.59956 | 0.00465 |
| I830012O16Ri<br>k | 1.11531 | 0.00340 | Pacsin2  | 0.77037 | 0.00005 | Timm13  | 0.59956 | 0.00065 |
| Foxk2             | 1.11482 | 0.00005 | Fgl2     | 0.77018 | 0.00470 | Grwd1   | 0.59913 | 0.00975 |

|               |         |         |            |         |         |              |         |         |
|---------------|---------|---------|------------|---------|---------|--------------|---------|---------|
| Gpr125        | 1.11447 | 0.00005 | Lman2      | 0.77006 | 0.00005 | Ube2l3       | 0.59903 | 0.00015 |
| Ripk2         | 1.11368 | 0.00005 | Wbp1       | 0.76967 | 0.00050 | Sgpl1        | 0.59894 | 0.00065 |
| Zfp324        | 1.11184 | 0.00005 | Rbm45      | 0.76942 | 0.00100 | Nubp2        | 0.59887 | 0.00090 |
| Nhej1         | 1.11166 | 0.01930 | Eif1b      | 0.76933 | 0.00005 | Ccdc90b      | 0.59819 | 0.01610 |
| Bcs1l         | 1.11042 | 0.00005 | Snrpd3     | 0.76874 | 0.00005 | Nlrp6        | 0.59798 | 0.00015 |
| Tubd1         | 1.10822 | 0.00150 | Pxdc1      | 0.76821 | 0.00005 | Nt5e         | 0.59790 | 0.00825 |
| Farp1         | 1.10817 | 0.00005 | Atp2a2     | 0.76778 | 0.00020 | Ugt2b38      | 0.59742 | 0.00040 |
| Samd9l        | 1.10652 | 0.00005 | D17Wsu104e | 0.76756 | 0.00005 | Zfml         | 0.59739 | 0.00095 |
| Homer1        | 1.10442 | 0.00005 | Eif3j1     | 0.76739 | 0.00045 | Abcd2        | 0.59638 | 0.01175 |
| 2810007J24Rik | 1.10408 | 0.00005 | Tpm1       | 0.76710 | 0.00155 | Pak1ip1      | 0.59621 | 0.00620 |
| Tmem258       | 1.10351 | 0.00005 | Cct6a      | 0.76663 | 0.00005 | Ifrd2        | 0.59601 | 0.00075 |
| Lym7          | 1.10333 | 0.04355 | Med21      | 0.76605 | 0.04955 | Tceb1        | 0.59568 | 0.00080 |
| Map3k4        | 1.10145 | 0.00005 | Acsl5      | 0.76554 | 0.00005 | Prpf31       | 0.59483 | 0.01695 |
| Krt18         | 1.10113 | 0.00005 | Vasp       | 0.76495 | 0.00045 | Mboat7       | 0.59456 | 0.01710 |
| G630090E17Ri  | 1.10102 | 0.00005 | Hars2      | 0.76486 | 0.04760 | Tns3         | 0.59455 | 0.01460 |
| k             |         |         |            |         |         |              |         |         |
| Svip          | 1.10093 | 0.00005 | Ddx39      | 0.76482 | 0.00920 | Nip7         | 0.59448 | 0.01295 |
| Gfpt1         | 1.10054 | 0.00005 | Sf3a1      | 0.76469 | 0.01350 | Rlf          | 0.59431 | 0.00085 |
| Mid1          | 1.10019 | 0.01080 | Capn2      | 0.76446 | 0.00005 | Snrpa1       | 0.59424 | 0.00520 |
| 0610012H03Ri  | 1.09942 | 0.00005 | Ptprf      | 0.76439 | 0.00005 | Dnajb4       | 0.59400 | 0.00065 |
| k             |         |         |            |         |         |              |         |         |
| Rala          | 1.09780 | 0.00005 | Rxrg       | 0.76360 | 0.02020 | Asxl2        | 0.59377 | 0.01030 |
| Tcaim         | 1.09714 | 0.00005 | Usp37      | 0.76310 | 0.04190 | Snrnp27      | 0.59354 | 0.00280 |
| Nit2          | 1.09559 | 0.00005 | Tppp       | 0.76259 | 0.04005 | Pmpcb        | 0.59279 | 0.00030 |
| Neu3          | 1.09391 | 0.00090 | Gss        | 0.76246 | 0.00595 | Cep135       | 0.59255 | 0.02505 |
| Xlr3a         | 1.09390 | 0.02115 | Cks1b      | 0.76232 | 0.00605 | Hsd17b2      | 0.59235 | 0.00020 |
| Zc4h2         | 1.09298 | 0.01480 | Klra2      | 0.76200 | 0.00995 | Pomk         | 0.59234 | 0.01845 |
| Nthl1         | 1.09203 | 0.00535 | Memo1      | 0.76078 | 0.00005 | Utp6         | 0.59219 | 0.03305 |
| Papd7         | 1.09183 | 0.03050 | Aox3       | 0.76042 | 0.00005 | Bloc1s5      | 0.59166 | 0.00150 |
| 4931406C07Ri  | 1.09093 | 0.00005 | Rnpep      | 0.75961 | 0.00025 | Ndufa8       | 0.59161 | 0.00035 |
| k             |         |         |            |         |         |              |         |         |
| Hspd1         | 1.09077 | 0.00005 | Mrpl52     | 0.75961 | 0.00005 | Hdac2        | 0.59149 | 0.00185 |
| Dars2         | 1.08999 | 0.00030 | Ptcd3      | 0.75952 | 0.00005 | Sod2         | 0.59147 | 0.00030 |
| Cyp7b1        | 1.08981 | 0.00005 | Impdh2     | 0.75934 | 0.00005 | Ddt          | 0.59097 | 0.00140 |
| Mblac2        | 1.08938 | 0.00005 | Irgm2      | 0.75891 | 0.00065 | Fam173b      | 0.59069 | 0.01080 |
| Tmem33        | 1.08914 | 0.00005 | Cotl1      | 0.75885 | 0.00035 | Psm7         | 0.59054 | 0.00010 |
| Ugt2b35       | 1.08826 | 0.00005 | Commf6     | 0.75838 | 0.00010 | Polr3d       | 0.59052 | 0.00910 |
| Cpeb1         | 1.08697 | 0.03730 | Rpl3       | 0.75831 | 0.00005 | Eif2ak2      | 0.59050 | 0.01880 |
| Oma1          | 1.08687 | 0.00005 | Nrn1       | 0.75634 | 0.00005 | Eif4e        | 0.58969 | 0.00035 |
| Ccbl2         | 1.08629 | 0.00005 | Atp11a     | 0.75611 | 0.03520 | Ccbl1        | 0.58901 | 0.00135 |
| Morc3         | 1.08511 | 0.00005 | Lin7a      | 0.75606 | 0.00010 | Bcml1        | 0.58858 | 0.03070 |
| Spcs2         | 1.08440 | 0.00005 | Galm       | 0.75606 | 0.00005 | Mmgt1        | 0.58825 | 0.00055 |
| Kifc3         | 1.08388 | 0.00005 | Epha1      | 0.75583 | 0.00135 | 1810022K09Ri | 0.58802 | 0.00465 |
|               |         |         |            |         |         | k            |         |         |

|          |         |         |               |         |         |        |         |         |
|----------|---------|---------|---------------|---------|---------|--------|---------|---------|
| Ola1     | 1.08307 | 0.00960 | Tpm3          | 0.75573 | 0.00005 | Agfg1  | 0.58709 | 0.01575 |
| Inhbc    | 1.08169 | 0.00005 | Mcu           | 0.75564 | 0.00060 | Hltf   | 0.58694 | 0.01885 |
| Abcc5    | 1.08107 | 0.04545 | Mrps18b       | 0.75517 | 0.00125 | Map2k1 | 0.58694 | 0.00370 |
| Pfn2     | 1.08103 | 0.00120 | Znhit1        | 0.75469 | 0.00925 | Hspa4  | 0.58620 | 0.03850 |
| BC004004 | 1.08054 | 0.00005 | Ogfod1        | 0.75415 | 0.00335 | Cpsf6  | 0.58606 | 0.03185 |
| Txndc5   | 1.08009 | 0.00005 | 2210016F16Rik | 0.75387 | 0.00005 | Rhbdf2 | 0.58562 | 0.01155 |
| Setd8    | 1.07719 | 0.00005 | Paqr7         | 0.75382 | 0.00040 | Pomp   | 0.58549 | 0.00020 |
| Sept9    | 1.07713 | 0.00005 | Mlh1          | 0.75371 | 0.04725 | Wipf2  | 0.58524 | 0.03335 |
| Homer2   | 1.07689 | 0.00005 | Klhdc7a       | 0.75349 | 0.00010 |        |         |         |
| Flywch1  | 1.07428 | 0.00005 | Tmem205       | 0.75332 | 0.00005 |        |         |         |

## 624 downregulated genes.

| Gene name     | log2 (fold change) | Pvalue  | Gene name     | log2 (fold change) | Pvalue  | Gene name | log2 (fold change) | Pvalue  |
|---------------|--------------------|---------|---------------|--------------------|---------|-----------|--------------------|---------|
| Tnnt2         | -5.88913           | 0.04125 | Hand2         | -1.31938           | 0.00025 | Ttc33     | -0.84098           | 0.00755 |
| A2m           | -4.76644           | 0.00005 | Prob1         | -1.31847           | 0.00015 | Xpa       | -0.84066           | 0.04105 |
| Hist1h1e      | -4.44818           | 0.00035 | Tram2         | -1.31620           | 0.00005 | Zfand6    | -0.84013           | 0.00005 |
| Psrc1         | -4.27959           | 0.04665 | Slc4a4        | -1.31380           | 0.00005 | Kctd13    | -0.83834           | 0.00655 |
| Fam107a       | -4.20698           | 0.00005 | Phf11c        | -1.31209           | 0.01015 | Gtf2a2    | -0.83828           | 0.00005 |
| Sult1e1       | -3.84316           | 0.00010 | Pla2g7        | -1.31054           | 0.00005 | Ubox5     | -0.83771           | 0.04950 |
| Fmo3          | -3.69727           | 0.00180 | Asl           | -1.30606           | 0.00005 | Kifc2     | -0.83737           | 0.01365 |
| Ptges3l       | -3.66518           | 0.01360 | Twist1        | -1.30453           | 0.02755 | Nox4      | -0.83711           | 0.00005 |
| Mup8          | -3.63873           | 0.00445 | Dkk3          | -1.30361           | 0.00555 | Zbtb16    | -0.83687           | 0.00005 |
| E030018B13Rik | -3.60028           | 0.04285 | Sulf2         | -1.30035           | 0.00040 | Ndst2     | -0.83409           | 0.00005 |
| Slc13a5       | -3.38539           | 0.00005 | Dusp1         | -1.29778           | 0.00005 | Fbxo21    | -0.83275           | 0.00005 |
| Camp          | -3.38431           | 0.02325 | Apoa5         | -1.29193           | 0.00005 | Fbxl20    | -0.83260           | 0.01640 |
| Tmem100       | -3.33224           | 0.00350 | Cep110        | -1.29052           | 0.00005 | G0s2      | -0.83213           | 0.00005 |
| Sbsn          | -3.23542           | 0.01110 | Mfsd7c        | -1.28814           | 0.00010 | Slc38a4   | -0.82344           | 0.00035 |
| Ntf3          | -3.21424           | 0.00025 | Gpr56         | -1.28128           | 0.00360 | Tiparp    | -0.82292           | 0.01920 |
| Slc10a6       | -3.20877           | 0.00200 | Scara5        | -1.27429           | 0.00005 | Hal       | -0.82200           | 0.00230 |
| Grb10         | -3.16304           | 0.00005 | Atp6v0d2      | -1.27121           | 0.00155 | Gskip     | -0.82165           | 0.00010 |
| Slc41a3       | -3.12535           | 0.00005 | Tbc1d16       | -1.26816           | 0.00005 | Gpx3      | -0.81614           | 0.00140 |
| Ngp           | -3.03636           | 0.00010 | Cabyr         | -1.26673           | 0.01515 | Fam222a   | -0.81442           | 0.00225 |
| Ly6d          | -2.98331           | 0.00005 | Pdk4          | -1.25987           | 0.00345 | Gpr116    | -0.81416           | 0.00005 |
| Tmem158       | -2.98196           | 0.01030 | Setd7         | -1.25564           | 0.00005 | Fbxo44    | -0.80770           | 0.01620 |
| Fgf21         | -2.97817           | 0.00115 | Lgals4        | -1.25314           | 0.00005 | Cd63      | -0.80746           | 0.01910 |
| Ccnb2         | -2.92383           | 0.00600 | 1500012F01Rik | -1.24904           | 0.01810 | Ass1      | -0.80735           | 0.00080 |
| Fbxo32        | -2.87663           | 0.00005 | Dcaf6         | -1.24650           | 0.00005 | Gne       | -0.80692           | 0.00015 |
| Ii20rb        | -2.86042           | 0.00970 | Ctgf          | -1.24631           | 0.00005 | Naip5     | -0.80563           | 0.00810 |
| Cyp7a1        | -2.80459           | 0.00005 | Gng2          | -1.24353           | 0.02915 | Gm6768    | -0.80512           | 0.00005 |
| Nipal1        | -2.80135           | 0.00005 | Gnat1         | -1.23738           | 0.00005 | Rcan2     | -0.80458           | 0.00820 |
| Sftpa1        | -2.79300           | 0.00005 | Reep4         | -1.23354           | 0.00005 | Vcam1     | -0.80337           | 0.00005 |

|               |          |         |           |          |         |               |          |         |
|---------------|----------|---------|-----------|----------|---------|---------------|----------|---------|
| Mycl          | -2.78849 | 0.00005 | Slc27a1   | -1.23209 | 0.00010 | Tob1          | -0.80208 | 0.00005 |
| Fst           | -2.77693 | 0.00005 | Tmem87b   | -1.22656 | 0.00005 | Chd6          | -0.80173 | 0.04470 |
| Got1          | -2.76459 | 0.00005 | Gm4737    | -1.22240 | 0.00005 | Aspg          | -0.79995 | 0.00005 |
| Col1a1        | -2.70357 | 0.00010 | Ucp2      | -1.21034 | 0.00070 | Rnf144a       | -0.79862 | 0.00650 |
| Eif4ebp3      | -2.69766 | 0.00005 | Cyp3a59   | -1.21030 | 0.00005 | Haus4         | -0.79813 | 0.01495 |
| Map3k6        | -2.67610 | 0.02345 | S100pbp   | -1.20883 | 0.00005 | Naga          | -0.79541 | 0.00005 |
| Mcoln2        | -2.67601 | 0.00255 | Insig2    | -1.20829 | 0.00005 | Cnppd1        | -0.79343 | 0.00005 |
| Cxcl14        | -2.65732 | 0.02915 | Plin5     | -1.20567 | 0.00005 | Vopp1         | -0.79034 | 0.03845 |
| Fmo2          | -2.64559 | 0.00005 | Ect2      | -1.20292 | 0.02395 | Ano10         | -0.78930 | 0.00025 |
| Nrm           | -2.59245 | 0.04185 | Enc1      | -1.20076 | 0.00005 | Ctif          | -0.78765 | 0.00005 |
| Upp2          | -2.57247 | 0.00005 | Caln1     | -1.18860 | 0.00200 | Eef2          | -0.78703 | 0.00030 |
| Sorbs3        | -2.53539 | 0.00005 | Fgb       | -1.18613 | 0.01945 | D16Ert472e    | -0.78615 | 0.00255 |
| Ddit4         | -2.47569 | 0.00100 | Odf2      | -1.18492 | 0.00135 | 5031439G07Rik | -0.78454 | 0.02455 |
| Gpcpd1        | -2.46507 | 0.00005 | Itipr1    | -1.18279 | 0.00055 | Tmem62        | -0.78410 | 0.00070 |
| Cirbp         | -2.44329 | 0.02450 | Emb       | -1.18037 | 0.02685 | Ankrd16       | -0.78346 | 0.00335 |
| Pbx3          | -2.44118 | 0.00180 | Fuca2     | -1.18022 | 0.00255 | Rab27a        | -0.78283 | 0.01425 |
| Mfsd2a        | -2.42180 | 0.00005 | Brap      | -1.17845 | 0.00005 | Cfh           | -0.78238 | 0.00250 |
| Limk2         | -2.41017 | 0.00005 | Agpat9    | -1.17400 | 0.00015 | Pold4         | -0.78194 | 0.02090 |
| Cyp2b10       | -2.37909 | 0.00005 | Gm3839    | -1.16499 | 0.00165 | Ranbp10       | -0.78151 | 0.00005 |
| Sult1d1       | -2.37787 | 0.00005 | Slc45a3   | -1.15847 | 0.00005 | Snx21         | -0.78134 | 0.03520 |
| Serpina3n     | -2.37569 | 0.00005 | Cntfr     | -1.15770 | 0.02440 | Il22ra1       | -0.78016 | 0.00275 |
| Wipi1         | -2.36340 | 0.00005 | Slc6a8    | -1.15765 | 0.00015 | Arhgef37      | -0.77965 | 0.00385 |
| Arntl2        | -2.36222 | 0.00145 | Nrbp2     | -1.15681 | 0.00005 | Rbl2          | -0.77933 | 0.00100 |
| Chac1         | -2.34464 | 0.00005 | Klf4      | -1.15365 | 0.00645 | Txnrd3        | -0.77868 | 0.00845 |
| Ppbb          | -2.28271 | 0.00250 | Bbs4      | -1.15245 | 0.00070 | Abhd15        | -0.77456 | 0.01220 |
| Bmf           | -2.27297 | 0.00055 | Glit1d1   | -1.15163 | 0.00005 | Dirc2         | -0.77148 | 0.00030 |
| Tmtc2         | -2.25512 | 0.00005 | Fga       | -1.14770 | 0.01665 | Pdpr          | -0.76807 | 0.01270 |
| Slc22a26      | -2.22278 | 0.00070 | Omd       | -1.14622 | 0.01500 | Cbx4          | -0.76727 | 0.00360 |
| Lpin1         | -2.20947 | 0.00005 | Ppm1k     | -1.14453 | 0.00005 | Asrg1         | -0.76617 | 0.04720 |
| Clcf1         | -2.19361 | 0.00205 | Rdh9      | -1.13811 | 0.00005 | Zfp871        | -0.76604 | 0.00010 |
| Sox12         | -2.18135 | 0.00005 | Bmyc      | -1.13393 | 0.01065 | Chp2          | -0.76164 | 0.03510 |
| Hist1h4m      | -2.16191 | 0.00020 | Cox6b2    | -1.13387 | 0.02525 | Cpb2          | -0.75994 | 0.00005 |
| Fkbp5         | -2.14996 | 0.00005 | Hmga1-rs1 | -1.12590 | 0.03140 | Klf11         | -0.75937 | 0.02555 |
| Cyp8b1        | -2.14663 | 0.00005 | Trib3     | -1.12529 | 0.00040 | Zscan25       | -0.75898 | 0.00765 |
| Btbd11        | -2.13999 | 0.00005 | Hykk      | -1.12046 | 0.00005 | Tymp          | -0.75885 | 0.00445 |
| Rab30         | -2.13266 | 0.00005 | Cyp2e1    | -1.11885 | 0.00280 | Adcy9         | -0.75837 | 0.00035 |
| Adcy1         | -2.12260 | 0.00010 | Ly6c2     | -1.11879 | 0.01220 | Ncoa4         | -0.75792 | 0.00005 |
| Dpysl3        | -2.10337 | 0.00295 | Grn       | -1.11532 | 0.00005 | Phldb3        | -0.75268 | 0.01870 |
| Ppargc1a      | -2.10286 | 0.00005 | Nnmt      | -1.11343 | 0.00005 | AA474331      | -0.75180 | 0.01225 |
| 6330408A02Rik | -2.08551 | 0.01955 | Cenpa     | -1.11295 | 0.00680 | Acot12        | -0.75160 | 0.00005 |
| Ubash3b       | -2.07379 | 0.00610 | Hmgb2     | -1.11071 | 0.00090 | Slc25a32      | -0.75141 | 0.00045 |
| Rpgrip1       | -2.06169 | 0.00630 | Soat2     | -1.10926 | 0.00005 | Gm9938        | -0.74883 | 0.04610 |
| Cyp26b1       | -2.06034 | 0.00005 | Morc4     | -1.10884 | 0.02750 | Zfp36l2       | -0.74801 | 0.00005 |
| Tmem88b       | -2.05976 | 0.00005 | Myo1g     | -1.10522 | 0.03365 | Tmem56        | -0.74781 | 0.00005 |



|           |          |         |               |          |         |              |          |         |
|-----------|----------|---------|---------------|----------|---------|--------------|----------|---------|
| Cdkn2c    | -2.01903 | 0.00005 | Zkscan17      | -1.10204 | 0.00005 | Fam13a       | -0.74613 | 0.00460 |
| Gm8923    | -1.96414 | 0.01830 | mt-Co2        | -1.10192 | 0.00005 | Gm5424       | -0.74417 | 0.00320 |
| Peg3      | -1.95821 | 0.00005 | Dyrk1b        | -1.10130 | 0.00040 | Pptc7        | -0.74261 | 0.00015 |
| Saa2      | -1.94396 | 0.00005 | Sned1         | -1.09881 | 0.02420 | Trpm2        | -0.73791 | 0.03375 |
| Kcnt2     | -1.93025 | 0.00005 | Ankrd33b      | -1.09832 | 0.00005 | Dgka         | -0.73733 | 0.00515 |
| Rfx4      | -1.92934 | 0.00880 | Txnip         | -1.09567 | 0.00005 | Slc25a12     | -0.73690 | 0.00750 |
| Atoh8     | -1.91944 | 0.00005 | Arl2bp        | -1.09205 | 0.00035 | Arl6ip6      | -0.73416 | 0.03870 |
| Cdkn1a    | -1.91815 | 0.00005 | Abca6         | -1.09078 | 0.00005 | Wdr45        | -0.73378 | 0.00035 |
| Sez6l2    | -1.91710 | 0.02185 | N4bp2         | -1.09037 | 0.00110 | Amn1         | -0.73330 | 0.03110 |
| Hamp      | -1.91464 | 0.00005 | 4930546H06Rik | -1.09013 | 0.01445 | Ulk1         | -0.73234 | 0.00005 |
| Tmprss2   | -1.91405 | 0.03475 | Gapdh         | -1.08749 | 0.00005 | Tango2       | -0.72608 | 0.00005 |
| Fam71e1   | -1.90629 | 0.03750 | Fam109a       | -1.08701 | 0.00030 | Zfp703       | -0.72153 | 0.00630 |
| Wdr62     | -1.89551 | 0.01065 | Fbf1          | -1.08458 | 0.00320 | Ocln         | -0.72112 | 0.00345 |
| Slc8b1    | -1.89379 | 0.00005 | Fgg           | -1.08441 | 0.00915 | Sla          | -0.72074 | 0.00625 |
| Adra1a    | -1.89064 | 0.00005 | Tfdp2         | -1.08198 | 0.00005 | Ntmt1        | -0.72009 | 0.02710 |
| St3gal5   | -1.89004 | 0.00005 | Mxra8         | -1.08009 | 0.01510 | Atl2         | -0.71905 | 0.00005 |
| Rnf125    | -1.88086 | 0.00005 | Sgk1          | -1.07361 | 0.00005 | Nr2c2        | -0.71858 | 0.00395 |
| Tcp11l2   | -1.87463 | 0.00005 | Tmed5         | -1.07302 | 0.00035 | Slc25a15     | -0.71615 | 0.00015 |
| Birc5     | -1.87083 | 0.02390 | Lgalsl        | -1.06632 | 0.00005 | Cyp2d9       | -0.71358 | 0.00040 |
| Rgs1      | -1.85714 | 0.00005 | Hmga1         | -1.06237 | 0.00155 | Eif4ebp1     | -0.71077 | 0.00010 |
| Adora1    | -1.85168 | 0.00005 | Gmn           | -1.06112 | 0.00060 | Mbtd1        | -0.70984 | 0.00895 |
| Nlrp12    | -1.84641 | 0.00005 | Lrrc20        | -1.05842 | 0.00045 | Ptbp2        | -0.70860 | 0.00415 |
| Isyna1    | -1.84399 | 0.00005 | Cep70         | -1.05403 | 0.01915 | Csf2rb2      | -0.70686 | 0.01325 |
| Ppargc1b  | -1.83547 | 0.00300 | Nudt18        | -1.05373 | 0.00005 | Cyp39a1      | -0.70614 | 0.00010 |
| Defb1     | -1.83350 | 0.00050 | Sall2         | -1.05311 | 0.00270 | Lrfn3        | -0.70517 | 0.00280 |
| Fam134b   | -1.82210 | 0.00005 | Enpp3         | -1.05295 | 0.00005 | Bbs10        | -0.70491 | 0.01645 |
| Wnk4      | -1.81864 | 0.04645 | Obp2a         | -1.05287 | 0.01055 | Terf2        | -0.70490 | 0.04840 |
| Setdb2    | -1.81825 | 0.00005 | Gde1          | -1.05068 | 0.00005 | Dsc2         | -0.70364 | 0.00005 |
| Apcs      | -1.81743 | 0.00005 | Klhl3         | -1.04569 | 0.00580 | Arl4a        | -0.70316 | 0.00075 |
| Arl4d     | -1.80704 | 0.00005 | Cisd1         | -1.04143 | 0.00005 | Hoga1        | -0.70268 | 0.00005 |
| Extl1     | -1.80056 | 0.03760 | Baiap2        | -1.04124 | 0.00005 | Arl16        | -0.70039 | 0.03520 |
| Serpina3c | -1.80046 | 0.00820 | Cbx2          | -1.03770 | 0.00045 | Slc25a42     | -0.70037 | 0.00010 |
| Fzd8      | -1.80030 | 0.00005 | Gm10762       | -1.03769 | 0.00205 | Pmm1         | -0.69851 | 0.03010 |
| Ms4a8a    | -1.79570 | 0.00010 | Il6ra         | -1.03440 | 0.00005 | D19Erttd737e | -0.69719 | 0.03315 |
| Slco1a4   | -1.76862 | 0.00005 | Klf1          | -1.03426 | 0.00465 | Dgcr14       | -0.69708 | 0.02110 |
| G6pc      | -1.76614 | 0.00005 | Gjc3          | -1.03375 | 0.00715 | Prodh        | -0.69496 | 0.00025 |
| Pnpla2    | -1.75371 | 0.00005 | Ttll7         | -1.03258 | 0.01200 | Eci2         | -0.69492 | 0.00025 |
| Pdzrn3    | -1.75363 | 0.00005 | Fam25c        | -1.03161 | 0.00005 | Abca5        | -0.69402 | 0.01450 |
| Osbpl5    | -1.75319 | 0.00200 | Rmnd5a        | -1.02825 | 0.00005 | Cyp4a31      | -0.69283 | 0.00245 |
| Map2k6    | -1.75067 | 0.00005 | Ada           | -1.02820 | 0.01540 | Gpc1         | -0.69011 | 0.01300 |
| Ctsl      | -1.73670 | 0.00005 | Slc43a2       | -1.02701 | 0.00265 | Timp3        | -0.68896 | 0.00065 |
| Cbx7      | -1.72977 | 0.00015 | Limd2         | -1.01521 | 0.00215 | Tbc1d15      | -0.68823 | 0.00005 |
| Cux2      | -1.72957 | 0.02515 | Snape2        | -1.01310 | 0.00010 | Fam84b       | -0.68510 | 0.01105 |
| Saa1      | -1.72703 | 0.00005 | Msrb3         | -1.01074 | 0.00030 | Nucks1       | -0.68440 | 0.00005 |

|               |          |         |           |          |         |               |          |         |
|---------------|----------|---------|-----------|----------|---------|---------------|----------|---------|
| Mat1a         | -1.72540 | 0.00005 | Dixdc1    | -1.00881 | 0.00930 | Kremen1       | -0.67872 | 0.00165 |
| Cyp2j9        | -1.72453 | 0.00005 | Trp53inp1 | -1.00723 | 0.00005 | Ppp2r2d       | -0.67590 | 0.00045 |
| Tmem41a       | -1.70457 | 0.03975 | Stard8    | -1.00447 | 0.00105 | Dpyd          | -0.67561 | 0.00015 |
| Fmo4          | -1.69585 | 0.00005 | Arl15     | -1.00252 | 0.00005 | Syne4         | -0.67436 | 0.04495 |
| Calcoco1      | -1.69478 | 0.00005 | Izumo4    | -1.00089 | 0.00930 | AB124611      | -0.67094 | 0.00915 |
| Cpne8         | -1.67183 | 0.00005 | Eif4b     | -0.99763 | 0.00005 | Erlec1        | -0.66942 | 0.00135 |
| Cdip1         | -1.64390 | 0.00005 | Cdk1      | -0.99102 | 0.03420 | Nedd1         | -0.66838 | 0.00020 |
| Iffo1         | -1.63648 | 0.00005 | Nek2      | -0.99024 | 0.02965 | 2810474O19Rik | -0.66753 | 0.00485 |
| Cpsf4l        | -1.61778 | 0.02225 | Ahcy      | -0.98765 | 0.00005 | Tab2          | -0.66716 | 0.00005 |
| Bhlhb9        | -1.61342 | 0.00190 | Col1a2    | -0.98735 | 0.00165 | Lyve1         | -0.66654 | 0.00060 |
| Top2a         | -1.61308 | 0.02155 | Inca1     | -0.98463 | 0.00005 | Zfp810        | -0.66364 | 0.01120 |
| Mylip         | -1.60773 | 0.00005 | Inpp5k    | -0.98190 | 0.00095 | 2410131K14Rik | -0.66260 | 0.00205 |
| Gabbr1        | -1.60465 | 0.00190 | Itih4     | -0.98090 | 0.00260 | Gcnt4         | -0.66222 | 0.00540 |
| Mup13         | -1.59073 | 0.00005 | Mt2       | -0.97956 | 0.00005 | Ccdc28a       | -0.66211 | 0.03475 |
| Ldb1          | -1.58017 | 0.00005 | Cdk19     | -0.97953 | 0.00060 | Gnpda1        | -0.66108 | 0.04950 |
| Mt1           | -1.57532 | 0.00005 | Ccnf      | -0.97862 | 0.00005 | Erg           | -0.65845 | 0.02870 |
| Tmem161b      | -1.57332 | 0.00225 | Tmem106b  | -0.97783 | 0.00040 | Ppp1cc        | -0.65793 | 0.00230 |
| Bcl2l11       | -1.57047 | 0.00010 | Ccng2     | -0.97739 | 0.00020 | Bin3          | -0.65544 | 0.01190 |
| Tox           | -1.56923 | 0.00015 | Fam46c    | -0.97372 | 0.00060 | Dlg3          | -0.65535 | 0.04430 |
| Rasl11b       | -1.56709 | 0.00195 | Mlit6     | -0.96900 | 0.00010 | Clmn          | -0.65113 | 0.00010 |
| Fam115a       | -1.54582 | 0.01435 | Gm2058    | -0.96882 | 0.03355 | Ccl6          | -0.65109 | 0.00100 |
| Bik           | -1.54367 | 0.00050 | Nceh1     | -0.96877 | 0.00005 | Cited2        | -0.65057 | 0.00455 |
| Klhl24        | -1.54318 | 0.00005 | Bnip3     | -0.96578 | 0.00005 | Cep57         | -0.64938 | 0.02060 |
| Mcf2l         | -1.53733 | 0.02230 | Ankrd44   | -0.96513 | 0.01155 | Serping1      | -0.64835 | 0.00130 |
| Slc43a1       | -1.53000 | 0.00010 | Fzd6      | -0.96502 | 0.00430 | Zfp358        | -0.64751 | 0.00745 |
| Crebrf        | -1.52705 | 0.00005 | Slc16a5   | -0.96429 | 0.00030 | Tmem219       | -0.64712 | 0.00055 |
| Por           | -1.52341 | 0.00005 | Rdh13     | -0.96227 | 0.00025 | Ip6k2         | -0.64425 | 0.00055 |
| Kcnn2         | -1.52275 | 0.00005 | Spry1     | -0.96128 | 0.00415 | Atg16l2       | -0.64205 | 0.04700 |
| Zfp629        | -1.52004 | 0.01075 | Arg1      | -0.96082 | 0.00020 | Stmn1         | -0.64110 | 0.02765 |
| Cadm4         | -1.51896 | 0.00005 | Ttpa      | -0.95937 | 0.00005 | Dyrk2         | -0.64095 | 0.00745 |
| Mvb12b        | -1.51149 | 0.02670 | Mthfd1l   | -0.95757 | 0.03095 | Cblb          | -0.64050 | 0.01190 |
| Cd14          | -1.50975 | 0.00005 | Cyp3a25   | -0.95588 | 0.00005 | F830016B08Rik | -0.64037 | 0.00010 |
| Cyp2d12       | -1.50844 | 0.00115 | Odf3b     | -0.95446 | 0.02035 | Hmgb3         | -0.63971 | 0.04000 |
| Moxd1         | -1.50472 | 0.00910 | Pros1     | -0.95406 | 0.00005 | Ssh1          | -0.63910 | 0.03265 |
| Mafb          | -1.49843 | 0.00005 | Ctdsp2    | -0.94821 | 0.00005 | Cps1          | -0.63675 | 0.03480 |
| 8430419L09Rik | -1.49694 | 0.00005 | Abcd4     | -0.94771 | 0.00070 | Snx33         | -0.63543 | 0.00350 |
| Slc25a29      | -1.49462 | 0.00090 | Zfp777    | -0.93898 | 0.00335 | Crcp          | -0.63496 | 0.00100 |
| Cln6          | -1.49084 | 0.00095 | Cd163     | -0.93792 | 0.00005 | Slc25a20      | -0.63386 | 0.00010 |
| Cpt1a         | -1.48848 | 0.00005 | Tmc6      | -0.93689 | 0.01915 | Ube2u         | -0.63376 | 0.04280 |
| Smim22        | -1.48174 | 0.00345 | Gbp2b     | -0.93492 | 0.03170 | Arrdc2        | -0.63354 | 0.02340 |
| Saa3          | -1.47811 | 0.00005 | Sufu      | -0.93444 | 0.03695 | Rnf217        | -0.63221 | 0.01420 |
| Sds           | -1.47762 | 0.00005 | Rbp1      | -0.93246 | 0.00005 | Dennd4a       | -0.63158 | 0.00030 |
| Hamp2         | -1.47460 | 0.00005 | Poc1a     | -0.93199 | 0.02960 | Slc27a5       | -0.63126 | 0.00570 |
| Dact2         | -1.46763 | 0.00005 | Sh2d4a    | -0.93021 | 0.02465 | Ddx28         | -0.63026 | 0.00420 |

|             |          |         |               |          |         |          |          |         |
|-------------|----------|---------|---------------|----------|---------|----------|----------|---------|
| Lpin2       | -1.46753 | 0.00005 | Rgs16         | -0.92812 | 0.00265 | Slc25a25 | -0.62995 | 0.00035 |
| Sesn2       | -1.46316 | 0.00005 | Cdo1          | -0.92731 | 0.00010 | Tm4sf1   | -0.62988 | 0.00135 |
| Cyp3a13     | -1.46230 | 0.00005 | Serinc3       | -0.92711 | 0.00005 | Fn1      | -0.62778 | 0.00595 |
| Dynlt1c     | -1.45814 | 0.03105 | Agtr1a        | -0.92522 | 0.00005 | Acsm3    | -0.62649 | 0.00055 |
| Smpd3       | -1.45586 | 0.01250 | Stard5        | -0.92218 | 0.00005 | Tnfsf12  | -0.62648 | 0.00745 |
| Itgb3       | -1.45254 | 0.00005 | Hgsnat        | -0.92024 | 0.00005 | Slc36a4  | -0.62357 | 0.00685 |
| Olfm1       | -1.44695 | 0.00035 | Fam214a       | -0.92016 | 0.00795 | Cth      | -0.62193 | 0.00180 |
| Slc7a2      | -1.44289 | 0.00005 | Kng1          | -0.91735 | 0.00040 | Gyk      | -0.62162 | 0.00005 |
| Rasl2-9     | -1.43875 | 0.03430 | Mug1          | -0.91627 | 0.00305 | Rnf103   | -0.61916 | 0.00025 |
| Bmper       | -1.43417 | 0.00030 | Hist1h1c      | -0.91610 | 0.00005 | Manea    | -0.61753 | 0.00430 |
| Tdo2        | -1.41961 | 0.00065 | Nudt4         | -0.91314 | 0.00005 | Golgb1   | -0.61666 | 0.01380 |
| Socs2       | -1.41875 | 0.00005 | Npc1          | -0.91292 | 0.00005 | Fetub    | -0.61639 | 0.00045 |
| Rbm3        | -1.41835 | 0.00005 | Kng2          | -0.91288 | 0.00005 | Zfand4   | -0.61565 | 0.01185 |
| Erb3        | -1.41683 | 0.00005 | Klf9          | -0.91100 | 0.00005 | Tns1     | -0.61484 | 0.00020 |
| Gfra1       | -1.41603 | 0.00005 | Hilpda        | -0.91017 | 0.00875 | Tat      | -0.61368 | 0.02125 |
| AA986860    | -1.41479 | 0.00005 | Ttc30b        | -0.90721 | 0.00700 | Pank1    | -0.61325 | 0.00020 |
| Angptl4     | -1.41224 | 0.00005 | Chpf2         | -0.90346 | 0.00005 | Gna12    | -0.61135 | 0.00005 |
| Slc25a47    | -1.40965 | 0.00005 | Ccdc82        | -0.89487 | 0.02035 | Zbtb44   | -0.61134 | 0.02605 |
| D17H6S56E-5 | -1.40953 | 0.00020 | Nos3          | -0.89383 | 0.00605 | Tgfb3    | -0.61057 | 0.01810 |
| Spata24     | -1.40871 | 0.00180 | Ei24          | -0.89263 | 0.00005 | Mmp14    | -0.61028 | 0.00030 |
| Zfp108      | -1.40725 | 0.01245 | Slc25a30      | -0.89173 | 0.00080 | Pdk1     | -0.60936 | 0.02755 |
| Itih3       | -1.40691 | 0.00005 | Lmbr1l        | -0.89152 | 0.00195 | H2-Q7    | -0.60927 | 0.00135 |
| Patz1       | -1.39993 | 0.00075 | Dhtkd1        | -0.88964 | 0.00070 | Sertad3  | -0.60883 | 0.04290 |
| Tbc1d30     | -1.39758 | 0.00020 | Adam23        | -0.88929 | 0.00005 | Fam160b2 | -0.60836 | 0.01130 |
| Fam214b     | -1.38850 | 0.00310 | Zkscan14      | -0.88387 | 0.00310 | March6   | -0.60728 | 0.00030 |
| Rgs12       | -1.38511 | 0.00565 | Igfbp1        | -0.88344 | 0.00005 | Fbxo46   | -0.60669 | 0.03660 |
| Marveld3    | -1.38434 | 0.00695 | Slc22a5       | -0.88224 | 0.00005 | Nxt2     | -0.60651 | 0.00065 |
| Cyp17a1     | -1.38274 | 0.00005 | Ube2cbp       | -0.88175 | 0.03790 | Mxi1     | -0.60643 | 0.00220 |
| Dcp1b       | -1.38236 | 0.00250 | Rhbdd2        | -0.88158 | 0.00190 | Mif4gd   | -0.60190 | 0.04530 |
| Heca        | -1.38035 | 0.00005 | Csnk1g1       | -0.87638 | 0.01790 | Ccpg1    | -0.60182 | 0.00120 |
| Cyp2c39     | -1.37732 | 0.00005 | Rhoq          | -0.87579 | 0.00360 | Zfp707   | -0.60085 | 0.00930 |
| Zfp956      | -1.37700 | 0.00705 | 1810055G02Rik | -0.87423 | 0.00005 | Igfbp3   | -0.60057 | 0.00635 |
| Des         | -1.36999 | 0.00045 | Il17rb        | -0.87414 | 0.00040 | Scd1     | -0.59856 | 0.00270 |
| Btg3        | -1.36855 | 0.00005 | Clasp2        | -0.87187 | 0.00075 | Khynyn   | -0.59827 | 0.01700 |
| Slc25a22    | -1.36753 | 0.00005 | Tmco4         | -0.87003 | 0.00385 | Qsox1    | -0.59660 | 0.00090 |
| Hrg         | -1.35735 | 0.00005 | Adrb3         | -0.86749 | 0.01185 | Gm9846   | -0.59590 | 0.00270 |
| Galnt15     | -1.35264 | 0.00065 | Slc37a4       | -0.86597 | 0.00005 | Il18     | -0.59577 | 0.04900 |
| Nim1        | -1.35096 | 0.00095 | Nudt16        | -0.86201 | 0.00565 | Pfkfb2   | -0.59503 | 0.00465 |
| Ipmk        | -1.34780 | 0.00005 | Wbp1l         | -0.86176 | 0.00005 | Casp6    | -0.59430 | 0.00325 |
| Slc25a34    | -1.34706 | 0.00005 | Gltsr2        | -0.85926 | 0.00005 | Arhgap23 | -0.59338 | 0.01310 |
| B3galt1     | -1.34364 | 0.00005 | Gpt2          | -0.85839 | 0.00005 | Rnase4   | -0.59335 | 0.04120 |
| Acpp        | -1.34357 | 0.00005 | Camk1d        | -0.85798 | 0.02685 | Inpp4a   | -0.59233 | 0.00620 |
| Smim13      | -1.34229 | 0.00005 | Miip          | -0.85793 | 0.00215 | Gab1     | -0.59166 | 0.01815 |
| Kcnj16      | -1.33973 | 0.02805 | P2ry2         | -0.85567 | 0.00010 | Oplah    | -0.58928 | 0.00350 |

|       |          |         |         |          |         |        |          |         |
|-------|----------|---------|---------|----------|---------|--------|----------|---------|
| Rad18 | -1.33517 | 0.00200 | Ddx26b  | -0.85427 | 0.00530 | Kynu   | -0.58798 | 0.00105 |
| Aim1  | -1.32969 | 0.00005 | Slc27a2 | -0.84937 | 0.00030 | Zfp746 | -0.58632 | 0.00185 |
| Cdca3 | -1.32757 | 0.01660 | Clec1b  | -0.84697 | 0.00030 | Armc10 | -0.58616 | 0.03360 |
| Ypel3 | -1.32326 | 0.00005 | Fgl1    | -0.84396 | 0.00065 | Sco2   | -0.58598 | 0.04865 |

**Supplementary Table 4.** The primer sequences for qRT-PCR analysis.

| Gene name | Species      | Primer sequences (5' -> 3')                                          |
|-----------|--------------|----------------------------------------------------------------------|
| Sparcl1   | Mus musculus | Forward: GGCAATCCCGACAAGTACAAG<br>Reverse: TGGTTTTCTATGTCTGCTGTAGC   |
| Sparc     | Mus musculus | Forward: GTGGAAATGGGAGAATTTGAGGA<br>Reverse: CTCACACACCTTGCCATGTTT   |
| Nrg4      | Mus musculus | Forward: CACGCTGCGAAGAGGTTTTTC<br>Reverse: CGCGATGGTAAGAGTGAGGA      |
| Tnfa      | Mus musculus | Forward: CCCTCACACTCAGATCATCTTCT<br>Reverse: GCTACGACGTGGGCTACAG     |
| IL1b      | Mus musculus | Forward: GCAACTGTTCCCTGAACTCAACT<br>Reverse: ATCTTTTGGGGTCCGTCAACT   |
| IL2b      | Mus musculus | Forward: GTGCTCCTTGTC AACAGCG<br>Reverse: GGGGAGTTTCAGGTTCTGTA       |
| Ccl2      | Mus musculus | Forward: TTAAAAACCTGGATCGGAACCAA<br>Reverse: GCATTAGCTTCAGATTTACGGGT |
| Ccl5      | Mus musculus | Forward: GCTGCTTTGCCTACCTCTCC<br>Reverse: TCGAGTGACAAACACGACTGC      |
| Adgre1    | Mus musculus | Forward: TGA CTACCTTGTGGTCCTAA<br>Reverse: CTTCCCAGAATCCAGTCTTTCC    |
| Col1a1    | Mus musculus | Forward: GCTCCTCTTAGGGGCCACT<br>Reverse: CCACGTCTCACCATTGGGG         |
| Col1a2    | Mus musculus | Forward: GTA ACTTCGTGCCTAGCAACA<br>Reverse: CCTTTGTCAGAATACTGAGCAGC  |
| Acta2     | Mus musculus | Forward: CCCAACTGGGACCACATGG<br>Reverse: TACATGCGGGGGACATTGAAG       |
| Tgfb1     | Mus musculus | Forward: CTCCCGTGGCTTCTAGTGC<br>Reverse: GCCTTAGTTTGGACAGGATCTG      |
| Nos2      | Mus musculus | Forward: GTTCTCAGCCCAACAATACAAGA<br>Reverse: GTGGACGGGTTCGATGTCAC    |
| Rplp0     | Mus musculus | Forward: AGATTCCGGATATGCTGTTGGC<br>Reverse: TCGGGTCCTAGACCAGTGTTCC   |

## References

1. Liu B, et al. Proteome-wide analysis of USP14 substrates revealed its role in hepatosteatosis via stabilization of FASN. *Nat Commun.* 2018;9(1):4770.
2. Boekhoudt GH, et al. Communication between NF-kappa B and Sp1 controls histone acetylation within the proximal promoter of the monocyte chemoattractant protein 1 gene. *J Immunol.* 2003;170(8):4139-4147.
3. Yokoyama WM, et al. Production of monoclonal antibodies. *Curr Protoc Immunol.* 2013;102:Unit 2.5.
4. Bertola A, Mathews S, Ki SH, Wang H, Gao B. Mouse model of chronic and binge ethanol feeding (the NIAAA model). *Nat Protoc.* 2013;8(3):627-637.
